# Supplementary material for: Sanye Tablet Ameliorates Insulin Resistance and Dysregulated Lipid Metabolism in High-Fat Diet-Induced Obese Mice
Source: Front Pharmacol. 2021 Sep 29;12:713750. doi: 10.3389/fphar.2021.713750 (PMC8511530; doi:10.3389/fphar.2021.713750)
Supplement: Supplementary file 5 [file DataSheet1.ZIP]

Archive with 5 entries (4 files):
- raw data/raw data figure 6.tif
- raw data/raw data figure 7 proteomics-enrichment-go analysis.xls
- raw data/raw data figure 7 proteomics-enrichment-kegg analysis.xls
- raw data/raw data figure2-6.xlsx
- raw data/
