# Supplementary material for: Sanye Tablet Ameliorates Insulin Resistance and Dysregulated Lipid Metabolism in High-Fat Diet-Induced Obese Mice
Source: Front Pharmacol. 2021 Sep 29;12:713750. doi: 10.3389/fphar.2021.713750 (PMC8511530; doi:10.3389/fphar.2021.713750)
Supplement: Supplementary file 5 [file DataSheet1.ZIP › raw data/raw data figure 7 proteomics-enrichment-go analysis.xls]

id	term	category	ListHits	ListTotal	PopHits	PopTotal	pval	padj	Enrichment_score	Gene
GO:0008037	cell recognition	biological_process	1	83	1	151	0	0	1.819277108	Q8CCS3
GO:0009988	cell-cell recognition	biological_process	1	83	1	151	0	0	1.819277108	Q8CCS3
GO:0003334	keratinocyte development	biological_process	1	83	1	151	0	0	1.819277108	A2A513
GO:0005882	intermediate filament	cellular_component	7	83	7	151	0	0	1.819277108	A2A513; Q9QWL7; P08730; Q9Z2K1; Q3UV17; Q922U2; P50446
GO:0045095	keratin filament	cellular_component	5	83	5	151	0	0	1.819277108	A2A513; P08730; Q3UV17; Q922U2; P50446
GO:0045103	intermediate filament-based process	biological_process	4	83	4	151	0	0	1.819277108	A2A513; Q9QWL7; Q9Z2K1; P50446
GO:0045104	intermediate filament cytoskeleton organization	biological_process	4	83	4	151	0	0	1.819277108	A2A513; Q9QWL7; Q9Z2K1; P50446
GO:0045109	intermediate filament organization	biological_process	3	83	3	151	0	0	1.819277108	A2A513; Q9QWL7; P50446
GO:0045111	intermediate filament cytoskeleton	cellular_component	8	83	8	151	0	0	1.819277108	A2A513; Q9QWL7; P08730; Q9Z2K1; P27005; Q3UV17; Q922U2; P50446
GO:0045682	regulation of epidermis development	biological_process	2	83	2	151	0	0	1.819277108	A2A513; Q9QWL7
GO:0045684	positive regulation of epidermis development	biological_process	2	83	2	151	0	0	1.819277108	A2A513; Q9QWL7
GO:0051290	protein heterotetramerization	biological_process	1	83	1	151	0	0	1.819277108	A2A513
GO:0001909	leukocyte mediated cytotoxicity	biological_process	2	83	2	151	0	0	1.819277108	Q3U7T5; Q8CCC2
GO:0001913	T cell mediated cytotoxicity	biological_process	2	83	2	151	0	0	1.819277108	Q3U7T5; Q8CCC2
GO:0002443	leukocyte mediated immunity	biological_process	2	83	2	151	0	0	1.819277108	Q3U7T5; Q8CCC2
GO:0002449	lymphocyte mediated immunity	biological_process	2	83	2	151	0	0	1.819277108	Q3U7T5; Q8CCC2
GO:0002456	T cell mediated immunity	biological_process	2	83	2	151	0	0	1.819277108	Q3U7T5; Q8CCC2
GO:0002460	adaptive immune response based on somatic recombination of immune receptors built from immunoglobulin superfamily domains	biological_process	2	83	2	151	0	0	1.819277108	Q3U7T5; Q8CCC2
GO:0008656	cysteine-type endopeptidase activator activity involved in apoptotic process	molecular_function	1	83	1	151	0	0	1.819277108	Q3U7T5
GO:0016504	peptidase activator activity	molecular_function	1	83	1	151	0	0	1.819277108	Q3U7T5
GO:0016505	peptidase activator activity involved in apoptotic process	molecular_function	1	83	1	151	0	0	1.819277108	Q3U7T5
GO:0031404	chloride ion binding	molecular_function	1	83	1	151	0	0	1.819277108	Q3U7T5
GO:0043028	cysteine-type endopeptidase regulator activity involved in apoptotic process	molecular_function	1	83	1	151	0	0	1.819277108	Q3U7T5
GO:0043621	protein self-association	molecular_function	2	83	2	151	0	0	1.819277108	Q3U7T5; Q8C7U1
GO:0051087	chaperone binding	molecular_function	3	83	3	151	0	0	1.819277108	Q3U7T5; Q64446; A2ARV4
GO:2001235	positive regulation of apoptotic signaling pathway	biological_process	4	83	4	151	0	0	1.819277108	Q3U7T5; Q9CZW2; P27005; P31725
GO:0000060	protein import into nucleus, translocation	biological_process	1	83	1	151	0	0	1.819277108	B2RWS6
GO:0000123	histone acetyltransferase complex	cellular_component	1	83	1	151	0	0	1.819277108	B2RWS6
GO:0000975	regulatory region DNA binding	molecular_function	1	83	1	151	0	0	1.819277108	B2RWS6
GO:0000976	transcription regulatory region sequence-specific DNA binding	molecular_function	1	83	1	151	0	0	1.819277108	B2RWS6
GO:0000977	RNA polymerase II regulatory region sequence-specific DNA binding	molecular_function	1	83	1	151	0	0	1.819277108	B2RWS6
GO:0000978	RNA polymerase II core promoter proximal region sequence-specific DNA binding	molecular_function	1	83	1	151	0	0	1.819277108	B2RWS6
GO:0000979	RNA polymerase II core promoter sequence-specific DNA binding	molecular_function	1	83	1	151	0	0	1.819277108	B2RWS6
GO:0000981	RNA polymerase II transcription factor activity, sequence-specific DNA binding	molecular_function	1	83	1	151	0	0	1.819277108	B2RWS6
GO:0000987	core promoter proximal region sequence-specific DNA binding	molecular_function	1	83	1	151	0	0	1.819277108	B2RWS6
GO:0000988	transcription factor activity, protein binding	molecular_function	2	83	2	151	0	0	1.819277108	B2RWS6; F8WH42
GO:0000989	transcription factor activity, transcription factor binding	molecular_function	2	83	2	151	0	0	1.819277108	B2RWS6; F8WH42
GO:0001012	RNA polymerase II regulatory region DNA binding	molecular_function	1	83	1	151	0	0	1.819277108	B2RWS6
GO:0001046	core promoter sequence-specific DNA binding	molecular_function	1	83	1	151	0	0	1.819277108	B2RWS6
GO:0001047	core promoter binding	molecular_function	1	83	1	151	0	0	1.819277108	B2RWS6
GO:0001067	regulatory region nucleic acid binding	molecular_function	1	83	1	151	0	0	1.819277108	B2RWS6
GO:0001071	nucleic acid binding transcription factor activity	molecular_function	2	83	2	151	0	0	1.819277108	B2RWS6; A0A1B0GSS6
GO:0001085	RNA polymerase II transcription factor binding	molecular_function	1	83	1	151	0	0	1.819277108	B2RWS6
GO:0001102	RNA polymerase II activating transcription factor binding	molecular_function	1	83	1	151	0	0	1.819277108	B2RWS6
GO:0001159	core promoter proximal region DNA binding	molecular_function	1	83	1	151	0	0	1.819277108	B2RWS6
GO:0001228	transcriptional activator activity, RNA polymerase II transcription regulatory region sequence-specific binding	molecular_function	1	83	1	151	0	0	1.819277108	B2RWS6
GO:0001756	somitogenesis	biological_process	2	83	2	151	0	0	1.819277108	B2RWS6; A0A0A6YWT3
GO:0001889	liver development	biological_process	3	83	3	151	0	0	1.819277108	B2RWS6; Q3TIA9; P07724
GO:0003684	damaged DNA binding	molecular_function	1	83	1	151	0	0	1.819277108	B2RWS6
GO:0003690	double-stranded DNA binding	molecular_function	1	83	1	151	0	0	1.819277108	B2RWS6
GO:0003700	transcription factor activity, sequence-specific DNA binding	molecular_function	2	83	2	151	0	0	1.819277108	B2RWS6; A0A1B0GSS6
GO:0003712	transcription cofactor activity	molecular_function	1	83	1	151	0	0	1.819277108	B2RWS6
GO:0003713	transcription coactivator activity	molecular_function	1	83	1	151	0	0	1.819277108	B2RWS6
GO:0004402	histone acetyltransferase activity	molecular_function	1	83	1	151	0	0	1.819277108	B2RWS6
GO:0004468	lysine N-acetyltransferase activity, acting on acetyl phosphate as donor	molecular_function	1	83	1	151	0	0	1.819277108	B2RWS6
GO:0005667	transcription factor complex	cellular_component	1	83	1	151	0	0	1.819277108	B2RWS6
GO:0006473	protein acetylation	biological_process	3	83	3	151	0	0	1.819277108	B2RWS6; P70354; F8WH42
GO:0006474	N-terminal protein amino acid acetylation	biological_process	1	83	1	151	0	0	1.819277108	B2RWS6
GO:0006475	internal protein amino acid acetylation	biological_process	3	83	3	151	0	0	1.819277108	B2RWS6; P70354; F8WH42
GO:0006476	protein deacetylation	biological_process	1	83	1	151	0	0	1.819277108	B2RWS6
GO:0006986	response to unfolded protein	biological_process	1	83	1	151	0	0	1.819277108	B2RWS6
GO:0006990	positive regulation of transcription from RNA polymerase II promoter involved in unfolded protein response	biological_process	1	83	1	151	0	0	1.819277108	B2RWS6
GO:0008080	N-acetyltransferase activity	molecular_function	1	83	1	151	0	0	1.819277108	B2RWS6
GO:0008134	transcription factor binding	molecular_function	2	83	2	151	0	0	1.819277108	B2RWS6; Q80VP1
GO:0008630	intrinsic apoptotic signaling pathway in response to DNA damage	biological_process	1	83	1	151	0	0	1.819277108	B2RWS6
GO:0009755	hormone-mediated signaling pathway	biological_process	1	83	1	151	0	0	1.819277108	B2RWS6
GO:0009952	anterior/posterior pattern specification	biological_process	3	83	3	151	0	0	1.819277108	B2RWS6; A0A0A6YWT3; Q3ULL0
GO:0010559	regulation of glycoprotein biosynthetic process	biological_process	1	83	1	151	0	0	1.819277108	B2RWS6
GO:0010560	positive regulation of glycoprotein biosynthetic process	biological_process	1	83	1	151	0	0	1.819277108	B2RWS6
GO:0010712	regulation of collagen metabolic process	biological_process	1	83	1	151	0	0	1.819277108	B2RWS6
GO:0010714	positive regulation of collagen metabolic process	biological_process	1	83	1	151	0	0	1.819277108	B2RWS6
GO:0010742	macrophage derived foam cell differentiation	biological_process	1	83	1	151	0	0	1.819277108	B2RWS6
GO:0014074	response to purine-containing compound	biological_process	1	83	1	151	0	0	1.819277108	B2RWS6
GO:0014735	regulation of muscle atrophy	biological_process	1	83	1	151	0	0	1.819277108	B2RWS6
GO:0014737	positive regulation of muscle atrophy	biological_process	1	83	1	151	0	0	1.819277108	B2RWS6
GO:0014744	positive regulation of muscle adaptation	biological_process	1	83	1	151	0	0	1.819277108	B2RWS6
GO:0014889	muscle atrophy	biological_process	1	83	1	151	0	0	1.819277108	B2RWS6
GO:0016407	acetyltransferase activity	molecular_function	2	83	2	151	0	0	1.819277108	B2RWS6; Q8BQN4
GO:0016410	N-acyltransferase activity	molecular_function	1	83	1	151	0	0	1.819277108	B2RWS6
GO:0016573	histone acetylation	biological_process	3	83	3	151	0	0	1.819277108	B2RWS6; P70354; F8WH42
GO:0016746	transferase activity, transferring acyl groups	molecular_function	4	83	4	151	0	0	1.819277108	B2RWS6; Q3TUU3; Q8BQN4; A0A0R4J293
GO:0016747	transferase activity, transferring acyl groups other than amino-acyl groups	molecular_function	3	83	3	151	0	0	1.819277108	B2RWS6; Q3TUU3; Q8BQN4
GO:0018076	N-terminal peptidyl-lysine acetylation	biological_process	1	83	1	151	0	0	1.819277108	B2RWS6
GO:0018205	peptidyl-lysine modification	biological_process	5	83	5	151	0	0	1.819277108	B2RWS6; Q64446; P70354; G5E8N3; F8WH42
GO:0018393	internal peptidyl-lysine acetylation	biological_process	3	83	3	151	0	0	1.819277108	B2RWS6; P70354; F8WH42
GO:0018394	peptidyl-lysine acetylation	biological_process	3	83	3	151	0	0	1.819277108	B2RWS6; P70354; F8WH42
GO:0019080	viral gene expression	biological_process	1	83	1	151	0	0	1.819277108	B2RWS6
GO:0019083	viral transcription	biological_process	1	83	1	151	0	0	1.819277108	B2RWS6
GO:0030219	megakaryocyte differentiation	biological_process	1	83	1	151	0	0	1.819277108	B2RWS6
GO:0030220	platelet formation	biological_process	1	83	1	151	0	0	1.819277108	B2RWS6
GO:0030239	myofibril assembly	biological_process	2	83	2	151	0	0	1.819277108	B2RWS6; O55124
GO:0030518	intracellular steroid hormone receptor signaling pathway	biological_process	1	83	1	151	0	0	1.819277108	B2RWS6
GO:0030521	androgen receptor signaling pathway	biological_process	1	83	1	151	0	0	1.819277108	B2RWS6
GO:0030968	endoplasmic reticulum unfolded protein response	biological_process	1	83	1	151	0	0	1.819277108	B2RWS6
GO:0031056	regulation of histone modification	biological_process	3	83	3	151	0	0	1.819277108	B2RWS6; P70354; F8WH42
GO:0031058	positive regulation of histone modification	biological_process	2	83	2	151	0	0	1.819277108	B2RWS6; F8WH42
GO:0031248	protein acetyltransferase complex	cellular_component	1	83	1	151	0	0	1.819277108	B2RWS6
GO:0031333	negative regulation of protein complex assembly	biological_process	1	83	1	151	0	0	1.819277108	B2RWS6
GO:0031365	N-terminal protein amino acid modification	biological_process	1	83	1	151	0	0	1.819277108	B2RWS6
GO:0031648	protein destabilization	biological_process	1	83	1	151	0	0	1.819277108	B2RWS6
GO:0032092	positive regulation of protein binding	biological_process	1	83	1	151	0	0	1.819277108	B2RWS6
GO:0032459	regulation of protein oligomerization	biological_process	1	83	1	151	0	0	1.819277108	B2RWS6
GO:0032460	negative regulation of protein oligomerization	biological_process	1	83	1	151	0	0	1.819277108	B2RWS6
GO:0032526	response to retinoic acid	biological_process	2	83	2	151	0	0	1.819277108	B2RWS6; P08730
GO:0032963	collagen metabolic process	biological_process	1	83	1	151	0	0	1.819277108	B2RWS6
GO:0032964	collagen biosynthetic process	biological_process	1	83	1	151	0	0	1.819277108	B2RWS6
GO:0032965	regulation of collagen biosynthetic process	biological_process	1	83	1	151	0	0	1.819277108	B2RWS6
GO:0032967	positive regulation of collagen biosynthetic process	biological_process	1	83	1	151	0	0	1.819277108	B2RWS6
GO:0033143	regulation of intracellular steroid hormone receptor signaling pathway	biological_process	1	83	1	151	0	0	1.819277108	B2RWS6
GO:0033158	regulation of protein import into nucleus, translocation	biological_process	1	83	1	151	0	0	1.819277108	B2RWS6
GO:0033160	positive regulation of protein import into nucleus, translocation	biological_process	1	83	1	151	0	0	1.819277108	B2RWS6
GO:0033613	activating transcription factor binding	molecular_function	1	83	1	151	0	0	1.819277108	B2RWS6
GO:0034212	peptide N-acetyltransferase activity	molecular_function	1	83	1	151	0	0	1.819277108	B2RWS6
GO:0034250	positive regulation of cellular amide metabolic process	biological_process	2	83	2	151	0	0	1.819277108	B2RWS6; Q9QWL7
GO:0034612	response to tumor necrosis factor	biological_process	1	83	1	151	0	0	1.819277108	B2RWS6
GO:0034614	cellular response to reactive oxygen species	biological_process	3	83	3	151	0	0	1.819277108	B2RWS6; Q64446; Q99KL8
GO:0034620	cellular response to unfolded protein	biological_process	1	83	1	151	0	0	1.819277108	B2RWS6
GO:0034644	cellular response to UV	biological_process	1	83	1	151	0	0	1.819277108	B2RWS6
GO:0035065	regulation of histone acetylation	biological_process	3	83	3	151	0	0	1.819277108	B2RWS6; P70354; F8WH42
GO:0035066	positive regulation of histone acetylation	biological_process	2	83	2	151	0	0	1.819277108	B2RWS6; F8WH42
GO:0035257	nuclear hormone receptor binding	molecular_function	2	83	2	151	0	0	1.819277108	B2RWS6; A2ARV4
GO:0035258	steroid hormone receptor binding	molecular_function	2	83	2	151	0	0	1.819277108	B2RWS6; A2ARV4
GO:0035259	glucocorticoid receptor binding	molecular_function	1	83	1	151	0	0	1.819277108	B2RWS6
GO:0035282	segmentation	biological_process	3	83	3	151	0	0	1.819277108	B2RWS6; A0A0A6YWT3; Q3ULL0
GO:0035601	protein deacylation	biological_process	1	83	1	151	0	0	1.819277108	B2RWS6
GO:0035690	cellular response to drug	biological_process	1	83	1	151	0	0	1.819277108	B2RWS6
GO:0035855	megakaryocyte development	biological_process	1	83	1	151	0	0	1.819277108	B2RWS6
GO:0035966	response to topologically incorrect protein	biological_process	1	83	1	151	0	0	1.819277108	B2RWS6
GO:0035967	cellular response to topologically incorrect protein	biological_process	1	83	1	151	0	0	1.819277108	B2RWS6
GO:0035983	response to trichostatin A	biological_process	1	83	1	151	0	0	1.819277108	B2RWS6
GO:0035984	cellular response to trichostatin A	biological_process	1	83	1	151	0	0	1.819277108	B2RWS6
GO:0036002	pre-mRNA binding	molecular_function	1	83	1	151	0	0	1.819277108	B2RWS6
GO:0036344	platelet morphogenesis	biological_process	1	83	1	151	0	0	1.819277108	B2RWS6
GO:0042771	intrinsic apoptotic signaling pathway in response to DNA damage by p53 class mediator	biological_process	1	83	1	151	0	0	1.819277108	B2RWS6
GO:0042975	peroxisome proliferator activated receptor binding	molecular_function	1	83	1	151	0	0	1.819277108	B2RWS6
GO:0043254	regulation of protein complex assembly	biological_process	2	83	2	151	0	0	1.819277108	B2RWS6; F6RX08
GO:0043388	positive regulation of DNA binding	biological_process	1	83	1	151	0	0	1.819277108	B2RWS6
GO:0043393	regulation of protein binding	biological_process	1	83	1	151	0	0	1.819277108	B2RWS6
GO:0043401	steroid hormone mediated signaling pathway	biological_process	1	83	1	151	0	0	1.819277108	B2RWS6
GO:0043425	bHLH transcription factor binding	molecular_function	1	83	1	151	0	0	1.819277108	B2RWS6
GO:0043500	muscle adaptation	biological_process	1	83	1	151	0	0	1.819277108	B2RWS6
GO:0043502	regulation of muscle adaptation	biological_process	1	83	1	151	0	0	1.819277108	B2RWS6
GO:0043543	protein acylation	biological_process	3	83	3	151	0	0	1.819277108	B2RWS6; P70354; F8WH42
GO:0043921	modulation by host of viral transcription	biological_process	1	83	1	151	0	0	1.819277108	B2RWS6
GO:0043923	positive regulation by host of viral transcription	biological_process	1	83	1	151	0	0	1.819277108	B2RWS6
GO:0043966	histone H3 acetylation	biological_process	2	83	2	151	0	0	1.819277108	B2RWS6; F8WH42
GO:0043967	histone H4 acetylation	biological_process	1	83	1	151	0	0	1.819277108	B2RWS6
GO:0043969	histone H2B acetylation	biological_process	1	83	1	151	0	0	1.819277108	B2RWS6
GO:0044033	multi-organism metabolic process	biological_process	1	83	1	151	0	0	1.819277108	B2RWS6
GO:0044212	transcription regulatory region DNA binding	molecular_function	1	83	1	151	0	0	1.819277108	B2RWS6
GO:0044236	multicellular organism metabolic process	biological_process	1	83	1	151	0	0	1.819277108	B2RWS6
GO:0044246	regulation of multicellular organismal metabolic process	biological_process	1	83	1	151	0	0	1.819277108	B2RWS6
GO:0044253	positive regulation of multicellular organismal metabolic process	biological_process	1	83	1	151	0	0	1.819277108	B2RWS6
GO:0044259	multicellular organismal macromolecule metabolic process	biological_process	1	83	1	151	0	0	1.819277108	B2RWS6
GO:0045214	sarcomere organization	biological_process	2	83	2	151	0	0	1.819277108	B2RWS6; O55124
GO:0045727	positive regulation of translation	biological_process	2	83	2	151	0	0	1.819277108	B2RWS6; Q9QWL7
GO:0045793	positive regulation of cell size	biological_process	2	83	2	151	0	0	1.819277108	B2RWS6; Q64446
GO:0045815	positive regulation of gene expression, epigenetic	biological_process	1	83	1	151	0	0	1.819277108	B2RWS6
GO:0046332	SMAD binding	molecular_function	2	83	2	151	0	0	1.819277108	B2RWS6; Q8K173
GO:0046683	response to organophosphorus	biological_process	1	83	1	151	0	0	1.819277108	B2RWS6
GO:0046782	regulation of viral transcription	biological_process	1	83	1	151	0	0	1.819277108	B2RWS6
GO:0050434	positive regulation of viral transcription	biological_process	1	83	1	151	0	0	1.819277108	B2RWS6
GO:0050681	androgen receptor binding	molecular_function	1	83	1	151	0	0	1.819277108	B2RWS6
GO:0050714	positive regulation of protein secretion	biological_process	1	83	1	151	0	0	1.819277108	B2RWS6
GO:0051047	positive regulation of secretion	biological_process	4	83	4	151	0	0	1.819277108	B2RWS6; P27005; F8WH42; P31725
GO:0051059	NF-kappaB binding	molecular_function	1	83	1	151	0	0	1.819277108	B2RWS6
GO:0051090	regulation of sequence-specific DNA binding transcription factor activity	biological_process	1	83	1	151	0	0	1.819277108	B2RWS6
GO:0051091	positive regulation of sequence-specific DNA binding transcription factor activity	biological_process	1	83	1	151	0	0	1.819277108	B2RWS6
GO:0051098	regulation of binding	biological_process	2	83	2	151	0	0	1.819277108	B2RWS6; F8WH42
GO:0051099	positive regulation of binding	biological_process	1	83	1	151	0	0	1.819277108	B2RWS6
GO:0051101	regulation of DNA binding	biological_process	2	83	2	151	0	0	1.819277108	B2RWS6; F8WH42
GO:0051147	regulation of muscle cell differentiation	biological_process	1	83	1	151	0	0	1.819277108	B2RWS6
GO:0051149	positive regulation of muscle cell differentiation	biological_process	1	83	1	151	0	0	1.819277108	B2RWS6
GO:0051153	regulation of striated muscle cell differentiation	biological_process	1	83	1	151	0	0	1.819277108	B2RWS6
GO:0051155	positive regulation of striated muscle cell differentiation	biological_process	1	83	1	151	0	0	1.819277108	B2RWS6
GO:0051385	response to mineralocorticoid	biological_process	1	83	1	151	0	0	1.819277108	B2RWS6
GO:0051427	hormone receptor binding	molecular_function	2	83	2	151	0	0	1.819277108	B2RWS6; A2ARV4
GO:0051495	positive regulation of cytoskeleton organization	biological_process	1	83	1	151	0	0	1.819277108	B2RWS6
GO:0051591	response to cAMP	biological_process	1	83	1	151	0	0	1.819277108	B2RWS6
GO:0052312	modulation of transcription in other organism involved in symbiotic interaction	biological_process	1	83	1	151	0	0	1.819277108	B2RWS6
GO:0052472	modulation by host of symbiont transcription	biological_process	1	83	1	151	0	0	1.819277108	B2RWS6
GO:0060177	regulation of angiotensin metabolic process	biological_process	1	83	1	151	0	0	1.819277108	B2RWS6
GO:0060297	regulation of sarcomere organization	biological_process	1	83	1	151	0	0	1.819277108	B2RWS6
GO:0060298	positive regulation of sarcomere organization	biological_process	1	83	1	151	0	0	1.819277108	B2RWS6
GO:0060348	bone development	biological_process	1	83	1	151	0	0	1.819277108	B2RWS6
GO:0060765	regulation of androgen receptor signaling pathway	biological_process	1	83	1	151	0	0	1.819277108	B2RWS6
GO:0061008	hepaticobiliary system development	biological_process	3	83	3	151	0	0	1.819277108	B2RWS6; Q3TIA9; P07724
GO:0061053	somite development	biological_process	2	83	2	151	0	0	1.819277108	B2RWS6; A0A0A6YWT3
GO:0061515	myeloid cell development	biological_process	3	83	3	151	0	0	1.819277108	B2RWS6; D3YUE8; Q91VB8
GO:0061733	peptide-lysine-N-acetyltransferase activity	molecular_function	1	83	1	151	0	0	1.819277108	B2RWS6
GO:0070301	cellular response to hydrogen peroxide	biological_process	2	83	2	151	0	0	1.819277108	B2RWS6; Q99KL8
GO:0070542	response to fatty acid	biological_process	1	83	1	151	0	0	1.819277108	B2RWS6
GO:0071236	cellular response to antibiotic	biological_process	1	83	1	151	0	0	1.819277108	B2RWS6
GO:0071300	cellular response to retinoic acid	biological_process	2	83	2	151	0	0	1.819277108	B2RWS6; P08730
GO:0071320	cellular response to cAMP	biological_process	1	83	1	151	0	0	1.819277108	B2RWS6
GO:0071383	cellular response to steroid hormone stimulus	biological_process	3	83	3	151	0	0	1.819277108	B2RWS6; Q3SXH3; P19157
GO:0071384	cellular response to corticosteroid stimulus	biological_process	2	83	2	151	0	0	1.819277108	B2RWS6; P19157
GO:0071385	cellular response to glucocorticoid stimulus	biological_process	2	83	2	151	0	0	1.819277108	B2RWS6; P19157
GO:0071389	cellular response to mineralocorticoid stimulus	biological_process	1	83	1	151	0	0	1.819277108	B2RWS6
GO:0071478	cellular response to radiation	biological_process	1	83	1	151	0	0	1.819277108	B2RWS6
GO:0071482	cellular response to light stimulus	biological_process	1	83	1	151	0	0	1.819277108	B2RWS6
GO:0071548	response to dexamethasone	biological_process	1	83	1	151	0	0	1.819277108	B2RWS6
GO:0071549	cellular response to dexamethasone stimulus	biological_process	1	83	1	151	0	0	1.819277108	B2RWS6
GO:0072331	signal transduction by p53 class mediator	biological_process	2	83	2	151	0	0	1.819277108	B2RWS6; Q9CZW2
GO:0072332	intrinsic apoptotic signaling pathway by p53 class mediator	biological_process	1	83	1	151	0	0	1.819277108	B2RWS6
GO:0090042	tubulin deacetylation	biological_process	1	83	1	151	0	0	1.819277108	B2RWS6
GO:0090043	regulation of tubulin deacetylation	biological_process	1	83	1	151	0	0	1.819277108	B2RWS6
GO:0090077	foam cell differentiation	biological_process	1	83	1	151	0	0	1.819277108	B2RWS6
GO:0090311	regulation of protein deacetylation	biological_process	1	83	1	151	0	0	1.819277108	B2RWS6
GO:0090595	acetyl-CoA:L-lysine N6-acetyltransferase	molecular_function	1	83	1	151	0	0	1.819277108	B2RWS6
GO:0097157	pre-mRNA intronic binding	molecular_function	1	83	1	151	0	0	1.819277108	B2RWS6
GO:0097237	cellular response to toxic substance	biological_process	1	83	1	151	0	0	1.819277108	B2RWS6
GO:0097677	STAT family protein binding	molecular_function	1	83	1	151	0	0	1.819277108	B2RWS6
GO:0098732	macromolecule deacylation	biological_process	1	83	1	151	0	0	1.819277108	B2RWS6
GO:0098751	bone cell development	biological_process	1	83	1	151	0	0	1.819277108	B2RWS6
GO:1901522	positive regulation of transcription from RNA polymerase II promoter involved in cellular response to chemical stimulus	biological_process	1	83	1	151	0	0	1.819277108	B2RWS6
GO:1901654	response to ketone	biological_process	2	83	2	151	0	0	1.819277108	B2RWS6; Q9D4N6
GO:1901655	cellular response to ketone	biological_process	2	83	2	151	0	0	1.819277108	B2RWS6; Q9D4N6
GO:1901983	regulation of protein acetylation	biological_process	3	83	3	151	0	0	1.819277108	B2RWS6; P70354; F8WH42
GO:1901985	positive regulation of protein acetylation	biological_process	2	83	2	151	0	0	1.819277108	B2RWS6; F8WH42
GO:1902275	regulation of chromatin organization	biological_process	4	83	4	151	0	0	1.819277108	B2RWS6; P70354; F6RX08; F8WH42
GO:1902493	acetyltransferase complex	cellular_component	1	83	1	151	0	0	1.819277108	B2RWS6
GO:1903020	positive regulation of glycoprotein metabolic process	biological_process	1	83	1	151	0	0	1.819277108	B2RWS6
GO:1903308	regulation of chromatin modification	biological_process	4	83	4	151	0	0	1.819277108	B2RWS6; P70354; F6RX08; F8WH42
GO:1903310	positive regulation of chromatin modification	biological_process	3	83	3	151	0	0	1.819277108	B2RWS6; F6RX08; F8WH42
GO:1903532	positive regulation of secretion by cell	biological_process	2	83	2	151	0	0	1.819277108	B2RWS6; F8WH42
GO:1990089	response to nerve growth factor	biological_process	1	83	1	151	0	0	1.819277108	B2RWS6
GO:1990090	cellular response to nerve growth factor stimulus	biological_process	1	83	1	151	0	0	1.819277108	B2RWS6
GO:1990405	protein antigen binding	molecular_function	1	83	1	151	0	0	1.819277108	B2RWS6
GO:1990837	sequence-specific double-stranded DNA binding	molecular_function	1	83	1	151	0	0	1.819277108	B2RWS6
GO:1990841	promoter-specific chromatin binding	molecular_function	1	83	1	151	0	0	1.819277108	B2RWS6
GO:2000629	negative regulation of miRNA metabolic process	biological_process	1	83	1	151	0	0	1.819277108	B2RWS6
GO:2000756	regulation of peptidyl-lysine acetylation	biological_process	3	83	3	151	0	0	1.819277108	B2RWS6; P70354; F8WH42
GO:2000758	positive regulation of peptidyl-lysine acetylation	biological_process	2	83	2	151	0	0	1.819277108	B2RWS6; F8WH42
GO:0004142	diacylglycerol cholinephosphotransferase activity	molecular_function	1	83	1	151	0	0	1.819277108	D3YYG4
GO:0004307	ethanolaminephosphotransferase activity	molecular_function	1	83	1	151	0	0	1.819277108	D3YYG4
GO:0006646	phosphatidylethanolamine biosynthetic process	biological_process	1	83	1	151	0	0	1.819277108	D3YYG4
GO:0006657	CDP-choline pathway	biological_process	1	83	1	151	0	0	1.819277108	D3YYG4
GO:0016780	phosphotransferase activity, for other substituted phosphate groups	molecular_function	1	83	1	151	0	0	1.819277108	D3YYG4
GO:0017169	CDP-alcohol phosphatidyltransferase activity	molecular_function	1	83	1	151	0	0	1.819277108	D3YYG4
GO:0046337	phosphatidylethanolamine metabolic process	biological_process	1	83	1	151	0	0	1.819277108	D3YYG4
GO:0002040	sprouting angiogenesis	biological_process	2	83	2	151	0	0	1.819277108	Q80VP1; A0A0A6YWT3
GO:0005905	clathrin-coated pit	cellular_component	2	83	2	151	0	0	1.819277108	Q80VP1; A2ARV4
GO:0016525	negative regulation of angiogenesis	biological_process	2	83	2	151	0	0	1.819277108	Q80VP1; F8WH42
GO:0030276	clathrin binding	molecular_function	1	83	1	151	0	0	1.819277108	Q80VP1
GO:0031234	extrinsic component of cytoplasmic side of plasma membrane	cellular_component	1	83	1	151	0	0	1.819277108	Q80VP1
GO:0035615	clathrin adaptor activity	molecular_function	1	83	1	151	0	0	1.819277108	Q80VP1
GO:0043195	terminal bouton	cellular_component	1	83	1	151	0	0	1.819277108	Q80VP1
GO:0045765	regulation of angiogenesis	biological_process	2	83	2	151	0	0	1.819277108	Q80VP1; F8WH42
GO:0098748	endocytic adaptor activity	molecular_function	1	83	1	151	0	0	1.819277108	Q80VP1
GO:0098888	extrinsic component of presynaptic membrane	NA	1	83	1	151	0	0	1.819277108	Q80VP1
GO:0098890	extrinsic component of postsynaptic membrane	NA	1	83	1	151	0	0	1.819277108	Q80VP1
GO:1901342	regulation of vasculature development	biological_process	2	83	2	151	0	0	1.819277108	Q80VP1; F8WH42
GO:1901343	negative regulation of vasculature development	biological_process	2	83	2	151	0	0	1.819277108	Q80VP1; F8WH42
GO:1903670	regulation of sprouting angiogenesis	biological_process	1	83	1	151	0	0	1.819277108	Q80VP1
GO:1903671	negative regulation of sprouting angiogenesis	biological_process	1	83	1	151	0	0	1.819277108	Q80VP1
GO:2000181	negative regulation of blood vessel morphogenesis	biological_process	2	83	2	151	0	0	1.819277108	Q80VP1; F8WH42
GO:0005344	oxygen transporter activity	molecular_function	2	83	2	151	0	0	1.819277108	A8DUK4; Q91VB8
GO:0005833	hemoglobin complex	cellular_component	2	83	2	151	0	0	1.819277108	A8DUK4; Q91VB8
GO:0015669	gas transport	biological_process	2	83	2	151	0	0	1.819277108	A8DUK4; Q91VB8
GO:0015671	oxygen transport	biological_process	2	83	2	151	0	0	1.819277108	A8DUK4; Q91VB8
GO:0030492	hemoglobin binding	molecular_function	2	83	2	151	0	0	1.819277108	A8DUK4; A2ARV4
GO:0031720	haptoglobin binding	molecular_function	2	83	2	151	0	0	1.819277108	A8DUK4; Q91VB8
GO:0031721	hemoglobin alpha binding	molecular_function	1	83	1	151	0	0	1.819277108	A8DUK4
GO:0031722	hemoglobin beta binding	molecular_function	1	83	1	151	0	0	1.819277108	A8DUK4
GO:0031838	haptoglobin-hemoglobin complex	cellular_component	2	83	2	151	0	0	1.819277108	A8DUK4; Q91VB8
GO:0008202	steroid metabolic process	biological_process	3	83	3	151	0	0	1.819277108	Q3UWC2; A7YL62; P07724
GO:0008203	cholesterol metabolic process	biological_process	2	83	2	151	0	0	1.819277108	Q3UWC2; A7YL62
GO:0016125	sterol metabolic process	biological_process	2	83	2	151	0	0	1.819277108	Q3UWC2; A7YL62
GO:0034364	high-density lipoprotein particle	cellular_component	2	83	2	151	0	0	1.819277108	Q3UWC2; A7YL62
GO:1902652	secondary alcohol metabolic process	biological_process	2	83	2	151	0	0	1.819277108	Q3UWC2; A7YL62
GO:0004222	metalloendopeptidase activity	molecular_function	1	83	1	151	0	0	1.819277108	Q14B74
GO:0008237	metallopeptidase activity	molecular_function	2	83	2	151	0	0	1.819277108	Q14B74; Q7TPZ8
GO:0000303	response to superoxide	biological_process	2	83	2	151	0	0	1.819277108	Q64446; Q99KL8
GO:0000305	response to oxygen radical	biological_process	2	83	2	151	0	0	1.819277108	Q64446; Q99KL8
GO:0001942	hair follicle development	biological_process	2	83	2	151	0	0	1.819277108	Q64446; Q9QWL7
GO:0001974	blood vessel remodeling	biological_process	2	83	2	151	0	0	1.819277108	Q64446; F8WH42
GO:0002082	regulation of oxidative phosphorylation	biological_process	1	83	1	151	0	0	1.819277108	Q64446
GO:0002263	cell activation involved in immune response	biological_process	3	83	3	151	0	0	1.819277108	Q64446; P16045; Q8CCC2
GO:0002285	lymphocyte activation involved in immune response	biological_process	3	83	3	151	0	0	1.819277108	Q64446; P16045; Q8CCC2
GO:0002286	T cell activation involved in immune response	biological_process	2	83	2	151	0	0	1.819277108	Q64446; Q8CCC2
GO:0002287	alpha-beta T cell activation involved in immune response	biological_process	2	83	2	151	0	0	1.819277108	Q64446; Q8CCC2
GO:0002292	T cell differentiation involved in immune response	biological_process	2	83	2	151	0	0	1.819277108	Q64446; Q8CCC2
GO:0002293	alpha-beta T cell differentiation involved in immune response	biological_process	2	83	2	151	0	0	1.819277108	Q64446; Q8CCC2
GO:0002294	CD4-positive, alpha-beta T cell differentiation involved in immune response	biological_process	2	83	2	151	0	0	1.819277108	Q64446; Q8CCC2
GO:0002366	leukocyte activation involved in immune response	biological_process	3	83	3	151	0	0	1.819277108	Q64446; P16045; Q8CCC2
GO:0004008	copper-exporting ATPase activity	molecular_function	1	83	1	151	0	0	1.819277108	Q64446
GO:0005375	copper ion transmembrane transporter activity	molecular_function	1	83	1	151	0	0	1.819277108	Q64446
GO:0005507	copper ion binding	molecular_function	2	83	2	151	0	0	1.819277108	Q64446; Q6WIZ7
GO:0005770	late endosome	cellular_component	1	83	1	151	0	0	1.819277108	Q64446
GO:0005903	brush border	cellular_component	2	83	2	151	0	0	1.819277108	Q64446; A2ARV4
GO:0006119	oxidative phosphorylation	biological_process	1	83	1	151	0	0	1.819277108	Q64446
GO:0006568	tryptophan metabolic process	biological_process	1	83	1	151	0	0	1.819277108	Q64446
GO:0006570	tyrosine metabolic process	biological_process	2	83	2	151	0	0	1.819277108	Q64446; Q3UEH2
GO:0006584	catecholamine metabolic process	biological_process	1	83	1	151	0	0	1.819277108	Q64446
GO:0006586	indolalkylamine metabolic process	biological_process	1	83	1	151	0	0	1.819277108	Q64446
GO:0006801	superoxide metabolic process	biological_process	3	83	3	151	0	0	1.819277108	Q64446; Q99KL8; P19157
GO:0006818	hydrogen transport	biological_process	1	83	1	151	0	0	1.819277108	Q64446
GO:0006878	cellular copper ion homeostasis	biological_process	1	83	1	151	0	0	1.819277108	Q64446
GO:0009072	aromatic amino acid family metabolic process	biological_process	2	83	2	151	0	0	1.819277108	Q64446; Q3UEH2
GO:0009116	nucleoside metabolic process	biological_process	2	83	2	151	0	0	1.819277108	Q64446; D3YUE8
GO:0009118	regulation of nucleoside metabolic process	biological_process	1	83	1	151	0	0	1.819277108	Q64446
GO:0009119	ribonucleoside metabolic process	biological_process	2	83	2	151	0	0	1.819277108	Q64446; D3YUE8
GO:0009123	nucleoside monophosphate metabolic process	biological_process	2	83	2	151	0	0	1.819277108	Q64446; D3YUE8
GO:0009126	purine nucleoside monophosphate metabolic process	biological_process	2	83	2	151	0	0	1.819277108	Q64446; D3YUE8
GO:0009141	nucleoside triphosphate metabolic process	biological_process	2	83	2	151	0	0	1.819277108	Q64446; D3YUE8
GO:0009144	purine nucleoside triphosphate metabolic process	biological_process	2	83	2	151	0	0	1.819277108	Q64446; D3YUE8
GO:0009161	ribonucleoside monophosphate metabolic process	biological_process	2	83	2	151	0	0	1.819277108	Q64446; D3YUE8
GO:0009167	purine ribonucleoside monophosphate metabolic process	biological_process	2	83	2	151	0	0	1.819277108	Q64446; D3YUE8
GO:0009199	ribonucleoside triphosphate metabolic process	biological_process	2	83	2	151	0	0	1.819277108	Q64446; D3YUE8
GO:0009205	purine ribonucleoside triphosphate metabolic process	biological_process	2	83	2	151	0	0	1.819277108	Q64446; D3YUE8
GO:0009712	catechol-containing compound metabolic process	biological_process	1	83	1	151	0	0	1.819277108	Q64446
GO:0009713	catechol-containing compound biosynthetic process	biological_process	1	83	1	151	0	0	1.819277108	Q64446
GO:0010042	response to manganese ion	biological_process	1	83	1	151	0	0	1.819277108	Q64446
GO:0010155	regulation of proton transport	biological_process	1	83	1	151	0	0	1.819277108	Q64446
GO:0010273	detoxification of copper ion	biological_process	1	83	1	151	0	0	1.819277108	Q64446
GO:0010591	regulation of lamellipodium assembly	biological_process	1	83	1	151	0	0	1.819277108	Q64446
GO:0010592	positive regulation of lamellipodium assembly	biological_process	1	83	1	151	0	0	1.819277108	Q64446
GO:0014812	muscle cell migration	biological_process	1	83	1	151	0	0	1.819277108	Q64446
GO:0014909	smooth muscle cell migration	biological_process	1	83	1	151	0	0	1.819277108	Q64446
GO:0014910	regulation of smooth muscle cell migration	biological_process	1	83	1	151	0	0	1.819277108	Q64446
GO:0014911	positive regulation of smooth muscle cell migration	biological_process	1	83	1	151	0	0	1.819277108	Q64446
GO:0015679	plasma membrane copper ion transport	biological_process	1	83	1	151	0	0	1.819277108	Q64446
GO:0015992	proton transport	biological_process	1	83	1	151	0	0	1.819277108	Q64446
GO:0016530	metallochaperone activity	molecular_function	1	83	1	151	0	0	1.819277108	Q64446
GO:0016531	copper chaperone activity	molecular_function	1	83	1	151	0	0	1.819277108	Q64446
GO:0016532	superoxide dismutase copper chaperone activity	molecular_function	1	83	1	151	0	0	1.819277108	Q64446
GO:0018958	phenol-containing compound metabolic process	biological_process	1	83	1	151	0	0	1.819277108	Q64446
GO:0019430	removal of superoxide radicals	biological_process	2	83	2	151	0	0	1.819277108	Q64446; Q99KL8
GO:0019829	cation-transporting ATPase activity	molecular_function	1	83	1	151	0	0	1.819277108	Q64446
GO:0021859	pyramidal neuron differentiation	biological_process	1	83	1	151	0	0	1.819277108	Q64446
GO:0021860	pyramidal neuron development	biological_process	1	83	1	151	0	0	1.819277108	Q64446
GO:0021872	forebrain generation of neurons	biological_process	1	83	1	151	0	0	1.819277108	Q64446
GO:0021879	forebrain neuron differentiation	biological_process	1	83	1	151	0	0	1.819277108	Q64446
GO:0021884	forebrain neuron development	biological_process	1	83	1	151	0	0	1.819277108	Q64446
GO:0021954	central nervous system neuron development	biological_process	1	83	1	151	0	0	1.819277108	Q64446
GO:0022404	molting cycle process	biological_process	2	83	2	151	0	0	1.819277108	Q64446; Q9QWL7
GO:0022405	hair cycle process	biological_process	2	83	2	151	0	0	1.819277108	Q64446; Q9QWL7
GO:0030032	lamellipodium assembly	biological_process	1	83	1	151	0	0	1.819277108	Q64446
GO:0030141	secretory granule	cellular_component	3	83	3	151	0	0	1.819277108	Q64446; Q3UN62; F2Z472
GO:0030199	collagen fibril organization	biological_process	2	83	2	151	0	0	1.819277108	Q64446; Q8K173
GO:0030335	positive regulation of cell migration	biological_process	1	83	1	151	0	0	1.819277108	Q64446
GO:0031069	hair follicle morphogenesis	biological_process	2	83	2	151	0	0	1.819277108	Q64446; Q9QWL7
GO:0031526	brush border membrane	cellular_component	2	83	2	151	0	0	1.819277108	Q64446; A2ARV4
GO:0032767	copper-dependent protein binding	molecular_function	1	83	1	151	0	0	1.819277108	Q64446
GO:0034756	regulation of iron ion transport	biological_process	1	83	1	151	0	0	1.819277108	Q64446
GO:0034757	negative regulation of iron ion transport	biological_process	1	83	1	151	0	0	1.819277108	Q64446
GO:0034759	regulation of iron ion transmembrane transport	biological_process	1	83	1	151	0	0	1.819277108	Q64446
GO:0034760	negative regulation of iron ion transmembrane transport	biological_process	1	83	1	151	0	0	1.819277108	Q64446
GO:0034763	negative regulation of transmembrane transport	biological_process	2	83	2	151	0	0	1.819277108	Q64446; A7YL62
GO:0034766	negative regulation of ion transmembrane transport	biological_process	1	83	1	151	0	0	1.819277108	Q64446
GO:0035434	copper ion transmembrane transport	biological_process	1	83	1	151	0	0	1.819277108	Q64446
GO:0035710	CD4-positive, alpha-beta T cell activation	biological_process	2	83	2	151	0	0	1.819277108	Q64446; Q8CCC2
GO:0036119	response to platelet-derived growth factor	biological_process	1	83	1	151	0	0	1.819277108	Q64446
GO:0036120	cellular response to platelet-derived growth factor stimulus	biological_process	1	83	1	151	0	0	1.819277108	Q64446
GO:0040017	positive regulation of locomotion	biological_process	1	83	1	151	0	0	1.819277108	Q64446
GO:0042093	T-helper cell differentiation	biological_process	2	83	2	151	0	0	1.819277108	Q64446; Q8CCC2
GO:0042278	purine nucleoside metabolic process	biological_process	2	83	2	151	0	0	1.819277108	Q64446; D3YUE8
GO:0042303	molting cycle	biological_process	3	83	3	151	0	0	1.819277108	Q64446; Q9QWL7; Q9Z2K1
GO:0042414	epinephrine metabolic process	biological_process	1	83	1	151	0	0	1.819277108	Q64446
GO:0042415	norepinephrine metabolic process	biological_process	1	83	1	151	0	0	1.819277108	Q64446
GO:0042417	dopamine metabolic process	biological_process	1	83	1	151	0	0	1.819277108	Q64446
GO:0042421	norepinephrine biosynthetic process	biological_process	1	83	1	151	0	0	1.819277108	Q64446
GO:0042423	catecholamine biosynthetic process	biological_process	1	83	1	151	0	0	1.819277108	Q64446
GO:0042428	serotonin metabolic process	biological_process	1	83	1	151	0	0	1.819277108	Q64446
GO:0042430	indole-containing compound metabolic process	biological_process	1	83	1	151	0	0	1.819277108	Q64446
GO:0042633	hair cycle	biological_process	3	83	3	151	0	0	1.819277108	Q64446; Q9QWL7; Q9Z2K1
GO:0043271	negative regulation of ion transport	biological_process	1	83	1	151	0	0	1.819277108	Q64446
GO:0043367	CD4-positive, alpha-beta T cell differentiation	biological_process	2	83	2	151	0	0	1.819277108	Q64446; Q8CCC2
GO:0043467	regulation of generation of precursor metabolites and energy	biological_process	1	83	1	151	0	0	1.819277108	Q64446
GO:0043473	pigmentation	biological_process	3	83	3	151	0	0	1.819277108	Q64446; Q3UV17; A2APZ1
GO:0043524	negative regulation of neuron apoptotic process	biological_process	1	83	1	151	0	0	1.819277108	Q64446
GO:0043682	copper-transporting ATPase activity	molecular_function	1	83	1	151	0	0	1.819277108	Q64446
GO:0046034	ATP metabolic process	biological_process	2	83	2	151	0	0	1.819277108	Q64446; D3YUE8
GO:0046128	purine ribonucleoside metabolic process	biological_process	2	83	2	151	0	0	1.819277108	Q64446; D3YUE8
GO:0046189	phenol-containing compound biosynthetic process	biological_process	1	83	1	151	0	0	1.819277108	Q64446
GO:0046631	alpha-beta T cell activation	biological_process	2	83	2	151	0	0	1.819277108	Q64446; Q8CCC2
GO:0046632	alpha-beta T cell differentiation	biological_process	2	83	2	151	0	0	1.819277108	Q64446; Q8CCC2
GO:0046688	response to copper ion	biological_process	1	83	1	151	0	0	1.819277108	Q64446
GO:0046915	transition metal ion transmembrane transporter activity	molecular_function	1	83	1	151	0	0	1.819277108	Q64446
GO:0046916	cellular transition metal ion homeostasis	biological_process	1	83	1	151	0	0	1.819277108	Q64446
GO:0048251	elastic fiber assembly	biological_process	1	83	1	151	0	0	1.819277108	Q64446
GO:0048286	lung alveolus development	biological_process	2	83	2	151	0	0	1.819277108	Q64446; F8WH42
GO:0048552	regulation of metalloenzyme activity	biological_process	1	83	1	151	0	0	1.819277108	Q64446
GO:0048553	negative regulation of metalloenzyme activity	biological_process	1	83	1	151	0	0	1.819277108	Q64446
GO:0048554	positive regulation of metalloenzyme activity	biological_process	1	83	1	151	0	0	1.819277108	Q64446
GO:0048730	epidermis morphogenesis	biological_process	2	83	2	151	0	0	1.819277108	Q64446; Q9QWL7
GO:0048771	tissue remodeling	biological_process	2	83	2	151	0	0	1.819277108	Q64446; F8WH42
GO:0050679	positive regulation of epithelial cell proliferation	biological_process	2	83	2	151	0	0	1.819277108	Q64446; A0A0A6YWT3
GO:0051341	regulation of oxidoreductase activity	biological_process	2	83	2	151	0	0	1.819277108	Q64446; P19157
GO:0051353	positive regulation of oxidoreductase activity	biological_process	1	83	1	151	0	0	1.819277108	Q64446
GO:0051541	elastin metabolic process	biological_process	1	83	1	151	0	0	1.819277108	Q64446
GO:0051542	elastin biosynthetic process	biological_process	1	83	1	151	0	0	1.819277108	Q64446
GO:0055070	copper ion homeostasis	biological_process	1	83	1	151	0	0	1.819277108	Q64446
GO:0060003	copper ion export	biological_process	1	83	1	151	0	0	1.819277108	Q64446
GO:0061687	detoxification of inorganic compound	biological_process	1	83	1	151	0	0	1.819277108	Q64446
GO:0071280	cellular response to copper ion	biological_process	1	83	1	151	0	0	1.819277108	Q64446
GO:0071450	cellular response to oxygen radical	biological_process	2	83	2	151	0	0	1.819277108	Q64446; Q99KL8
GO:0071451	cellular response to superoxide	biological_process	2	83	2	151	0	0	1.819277108	Q64446; Q99KL8
GO:0085029	extracellular matrix assembly	biological_process	1	83	1	151	0	0	1.819277108	Q64446
GO:0097501	stress response to metal ion	biological_process	1	83	1	151	0	0	1.819277108	Q64446
GO:0097581	lamellipodium organization	biological_process	1	83	1	151	0	0	1.819277108	Q64446
GO:0098773	skin epidermis development	biological_process	2	83	2	151	0	0	1.819277108	Q64446; Q9QWL7
GO:0098862	cluster of actin-based cell projections	cellular_component	2	83	2	151	0	0	1.819277108	Q64446; A2ARV4
GO:0099503	secretory vesicle	cellular_component	2	83	2	151	0	0	1.819277108	Q64446; Q3UN62
GO:1901160	primary amino compound metabolic process	biological_process	1	83	1	151	0	0	1.819277108	Q64446
GO:1901215	negative regulation of neuron death	biological_process	1	83	1	151	0	0	1.819277108	Q64446
GO:1901657	glycosyl compound metabolic process	biological_process	2	83	2	151	0	0	1.819277108	Q64446; D3YUE8
GO:1902743	regulation of lamellipodium organization	biological_process	1	83	1	151	0	0	1.819277108	Q64446
GO:1902745	positive regulation of lamellipodium organization	biological_process	1	83	1	151	0	0	1.819277108	Q64446
GO:1903136	cuprous ion binding	molecular_function	1	83	1	151	0	0	1.819277108	Q64446
GO:1903578	regulation of ATP metabolic process	biological_process	1	83	1	151	0	0	1.819277108	Q64446
GO:1904063	negative regulation of cation transmembrane transport	biological_process	1	83	1	151	0	0	1.819277108	Q64446
GO:1904732	regulation of electron carrier activity	biological_process	1	83	1	151	0	0	1.819277108	Q64446
GO:1904738	vascular associated smooth muscle cell migration	biological_process	1	83	1	151	0	0	1.819277108	Q64446
GO:1904752	regulation of vascular associated smooth muscle cell migration	biological_process	1	83	1	151	0	0	1.819277108	Q64446
GO:1904754	positive regulation of vascular associated smooth muscle cell migration	biological_process	1	83	1	151	0	0	1.819277108	Q64446
GO:1904959	regulation of cytochrome-c oxidase activity	biological_process	1	83	1	151	0	0	1.819277108	Q64446
GO:1990169	stress response to copper ion	biological_process	1	83	1	151	0	0	1.819277108	Q64446
GO:1990267	response to transition metal nanoparticle	biological_process	4	83	4	151	0	0	1.819277108	Q64446; P27005; Q3UEH2; P31725
GO:2000147	positive regulation of cell motility	biological_process	1	83	1	151	0	0	1.819277108	Q64446
GO:0031424	keratinization	biological_process	3	83	3	151	0	0	1.819277108	Q9QWL7; Q9Z2K1; P50446
GO:0032395	MHC class II receptor activity	molecular_function	1	83	1	151	0	0	1.819277108	Q9QWL7
GO:0042287	MHC protein binding	molecular_function	1	83	1	151	0	0	1.819277108	Q9QWL7
GO:0042289	MHC class II protein binding	molecular_function	1	83	1	151	0	0	1.819277108	Q9QWL7
GO:0042634	regulation of hair cycle	biological_process	1	83	1	151	0	0	1.819277108	Q9QWL7
GO:0042635	positive regulation of hair cycle	biological_process	1	83	1	151	0	0	1.819277108	Q9QWL7
GO:0051797	regulation of hair follicle development	biological_process	1	83	1	151	0	0	1.819277108	Q9QWL7
GO:0051798	positive regulation of hair follicle development	biological_process	1	83	1	151	0	0	1.819277108	Q9QWL7
GO:0004082	bisphosphoglycerate mutase activity	molecular_function	1	83	1	151	0	0	1.819277108	D3YUE8
GO:0004083	bisphosphoglycerate 2-phosphatase activity	molecular_function	1	83	1	151	0	0	1.819277108	D3YUE8
GO:0004619	phosphoglycerate mutase activity	molecular_function	1	83	1	151	0	0	1.819277108	D3YUE8
GO:0006090	pyruvate metabolic process	biological_process	1	83	1	151	0	0	1.819277108	D3YUE8
GO:0006096	glycolytic process	biological_process	1	83	1	151	0	0	1.819277108	D3YUE8
GO:0006098	pentose-phosphate shunt	biological_process	1	83	1	151	0	0	1.819277108	D3YUE8
GO:0006165	nucleoside diphosphate phosphorylation	biological_process	1	83	1	151	0	0	1.819277108	D3YUE8
GO:0006733	oxidoreduction coenzyme metabolic process	biological_process	1	83	1	151	0	0	1.819277108	D3YUE8
GO:0006739	NADP metabolic process	biological_process	1	83	1	151	0	0	1.819277108	D3YUE8
GO:0006757	ATP generation from ADP	biological_process	1	83	1	151	0	0	1.819277108	D3YUE8
GO:0009132	nucleoside diphosphate metabolic process	biological_process	1	83	1	151	0	0	1.819277108	D3YUE8
GO:0009135	purine nucleoside diphosphate metabolic process	biological_process	1	83	1	151	0	0	1.819277108	D3YUE8
GO:0009179	purine ribonucleoside diphosphate metabolic process	biological_process	1	83	1	151	0	0	1.819277108	D3YUE8
GO:0009185	ribonucleoside diphosphate metabolic process	biological_process	1	83	1	151	0	0	1.819277108	D3YUE8
GO:0016866	intramolecular transferase activity	molecular_function	1	83	1	151	0	0	1.819277108	D3YUE8
GO:0016868	intramolecular transferase activity, phosphotransferases	molecular_function	1	83	1	151	0	0	1.819277108	D3YUE8
GO:0019362	pyridine nucleotide metabolic process	biological_process	1	83	1	151	0	0	1.819277108	D3YUE8
GO:0019682	glyceraldehyde-3-phosphate metabolic process	biological_process	1	83	1	151	0	0	1.819277108	D3YUE8
GO:0019748	secondary metabolic process	biological_process	1	83	1	151	0	0	1.819277108	D3YUE8
GO:0034416	bisphosphoglycerate phosphatase activity	molecular_function	1	83	1	151	0	0	1.819277108	D3YUE8
GO:0043455	regulation of secondary metabolic process	biological_process	1	83	1	151	0	0	1.819277108	D3YUE8
GO:0043456	regulation of pentose-phosphate shunt	biological_process	1	83	1	151	0	0	1.819277108	D3YUE8
GO:0043470	regulation of carbohydrate catabolic process	biological_process	1	83	1	151	0	0	1.819277108	D3YUE8
GO:0043471	regulation of cellular carbohydrate catabolic process	biological_process	1	83	1	151	0	0	1.819277108	D3YUE8
GO:0046031	ADP metabolic process	biological_process	1	83	1	151	0	0	1.819277108	D3YUE8
GO:0046496	nicotinamide nucleotide metabolic process	biological_process	1	83	1	151	0	0	1.819277108	D3YUE8
GO:0046538	2,3-bisphosphoglycerate-dependent phosphoglycerate mutase activity	molecular_function	1	83	1	151	0	0	1.819277108	D3YUE8
GO:0046939	nucleotide phosphorylation	biological_process	1	83	1	151	0	0	1.819277108	D3YUE8
GO:0048821	erythrocyte development	biological_process	2	83	2	151	0	0	1.819277108	D3YUE8; Q91VB8
GO:0051156	glucose 6-phosphate metabolic process	biological_process	1	83	1	151	0	0	1.819277108	D3YUE8
GO:0051193	regulation of cofactor metabolic process	biological_process	1	83	1	151	0	0	1.819277108	D3YUE8
GO:0051196	regulation of coenzyme metabolic process	biological_process	1	83	1	151	0	0	1.819277108	D3YUE8
GO:0072524	pyridine-containing compound metabolic process	biological_process	1	83	1	151	0	0	1.819277108	D3YUE8
GO:1902031	regulation of NADP metabolic process	biological_process	1	83	1	151	0	0	1.819277108	D3YUE8
GO:0004016	adenylate cyclase activity	molecular_function	1	83	1	151	0	0	1.819277108	Q9D4N6
GO:0004383	guanylate cyclase activity	molecular_function	1	83	1	151	0	0	1.819277108	Q9D4N6
GO:0006182	cGMP biosynthetic process	biological_process	1	83	1	151	0	0	1.819277108	Q9D4N6
GO:0007189	adenylate cyclase-activating G-protein coupled receptor signaling pathway	biological_process	1	83	1	151	0	0	1.819277108	Q9D4N6
GO:0007190	activation of adenylate cyclase activity	biological_process	1	83	1	151	0	0	1.819277108	Q9D4N6
GO:0008074	guanylate cyclase complex, soluble	cellular_component	1	83	1	151	0	0	1.819277108	Q9D4N6
GO:0008294	calcium- and calmodulin-responsive adenylate cyclase activity	molecular_function	1	83	1	151	0	0	1.819277108	Q9D4N6
GO:0009975	cyclase activity	molecular_function	1	83	1	151	0	0	1.819277108	Q9D4N6
GO:0016849	phosphorus-oxygen lyase activity	molecular_function	1	83	1	151	0	0	1.819277108	Q9D4N6
GO:0019933	cAMP-mediated signaling	biological_process	1	83	1	151	0	0	1.819277108	Q9D4N6
GO:0019935	cyclic-nucleotide-mediated signaling	biological_process	1	83	1	151	0	0	1.819277108	Q9D4N6
GO:0030801	positive regulation of cyclic nucleotide metabolic process	biological_process	1	83	1	151	0	0	1.819277108	Q9D4N6
GO:0030804	positive regulation of cyclic nucleotide biosynthetic process	biological_process	1	83	1	151	0	0	1.819277108	Q9D4N6
GO:0030810	positive regulation of nucleotide biosynthetic process	biological_process	1	83	1	151	0	0	1.819277108	Q9D4N6
GO:0030816	positive regulation of cAMP metabolic process	biological_process	1	83	1	151	0	0	1.819277108	Q9D4N6
GO:0030819	positive regulation of cAMP biosynthetic process	biological_process	1	83	1	151	0	0	1.819277108	Q9D4N6
GO:0031281	positive regulation of cyclase activity	biological_process	1	83	1	151	0	0	1.819277108	Q9D4N6
GO:0042752	regulation of circadian rhythm	biological_process	1	83	1	151	0	0	1.819277108	Q9D4N6
GO:0045762	positive regulation of adenylate cyclase activity	biological_process	1	83	1	151	0	0	1.819277108	Q9D4N6
GO:0045981	positive regulation of nucleotide metabolic process	biological_process	1	83	1	151	0	0	1.819277108	Q9D4N6
GO:0046068	cGMP metabolic process	biological_process	1	83	1	151	0	0	1.819277108	Q9D4N6
GO:0051349	positive regulation of lyase activity	biological_process	1	83	1	151	0	0	1.819277108	Q9D4N6
GO:1900373	positive regulation of purine nucleotide biosynthetic process	biological_process	1	83	1	151	0	0	1.819277108	Q9D4N6
GO:1900544	positive regulation of purine nucleotide metabolic process	biological_process	1	83	1	151	0	0	1.819277108	Q9D4N6
GO:1904321	response to forskolin	biological_process	1	83	1	151	0	0	1.819277108	Q9D4N6
GO:1904322	cellular response to forskolin	biological_process	1	83	1	151	0	0	1.819277108	Q9D4N6
GO:0043586	tongue development	biological_process	1	83	1	151	0	0	1.819277108	P08730
GO:0043587	tongue morphogenesis	biological_process	1	83	1	151	0	0	1.819277108	P08730
GO:0031057	negative regulation of histone modification	biological_process	1	83	1	151	0	0	1.819277108	P70354
GO:0035067	negative regulation of histone acetylation	biological_process	1	83	1	151	0	0	1.819277108	P70354
GO:1901984	negative regulation of protein acetylation	biological_process	1	83	1	151	0	0	1.819277108	P70354
GO:1903309	negative regulation of chromatin modification	biological_process	1	83	1	151	0	0	1.819277108	P70354
GO:2000757	negative regulation of peptidyl-lysine acetylation	biological_process	1	83	1	151	0	0	1.819277108	P70354
GO:2001251	negative regulation of chromosome organization	biological_process	2	83	2	151	0	0	1.819277108	P70354; F6RX08
GO:0005765	lysosomal membrane	cellular_component	2	83	2	151	0	0	1.819277108	A0JLR7; A2ARV4
GO:0043484	regulation of RNA splicing	biological_process	1	83	1	151	0	0	1.819277108	A0JLR7
GO:0097493	structural molecule activity conferring elasticity	molecular_function	2	83	2	151	0	0	1.819277108	A0JLR7; O55124
GO:0098852	lytic vacuole membrane	cellular_component	2	83	2	151	0	0	1.819277108	A0JLR7; A2ARV4
GO:1901385	regulation of voltage-gated calcium channel activity	biological_process	1	83	1	151	0	0	1.819277108	A0JLR7
GO:0002429	immune response-activating cell surface receptor signaling pathway	biological_process	1	83	1	151	0	0	1.819277108	Q3V3I1
GO:0002757	immune response-activating signal transduction	biological_process	1	83	1	151	0	0	1.819277108	Q3V3I1
GO:0002764	immune response-regulating signaling pathway	biological_process	1	83	1	151	0	0	1.819277108	Q3V3I1
GO:0002768	immune response-regulating cell surface receptor signaling pathway	biological_process	1	83	1	151	0	0	1.819277108	Q3V3I1
GO:0005070	SH3/SH2 adaptor activity	molecular_function	1	83	1	151	0	0	1.819277108	Q3V3I1
GO:0035591	signaling adaptor activity	molecular_function	1	83	1	151	0	0	1.819277108	Q3V3I1
GO:0042101	T cell receptor complex	cellular_component	1	83	1	151	0	0	1.819277108	Q3V3I1
GO:0043235	receptor complex	cellular_component	2	83	2	151	0	0	1.819277108	Q3V3I1; A2ARV4
GO:0050851	antigen receptor-mediated signaling pathway	biological_process	1	83	1	151	0	0	1.819277108	Q3V3I1
GO:0050852	T cell receptor signaling pathway	biological_process	1	83	1	151	0	0	1.819277108	Q3V3I1
GO:0098802	plasma membrane receptor complex	cellular_component	1	83	1	151	0	0	1.819277108	Q3V3I1
GO:0005581	collagen trimer	cellular_component	2	83	2	151	0	0	1.819277108	Q07563; Q8K173
GO:0030056	hemidesmosome	cellular_component	1	83	1	151	0	0	1.819277108	Q07563
GO:0031581	hemidesmosome assembly	biological_process	1	83	1	151	0	0	1.819277108	Q07563
GO:0004066	asparagine synthase (glutamine-hydrolyzing) activity	molecular_function	1	83	1	151	0	0	1.819277108	Q3TIA9
GO:0006528	asparagine metabolic process	biological_process	1	83	1	151	0	0	1.819277108	Q3TIA9
GO:0006529	asparagine biosynthetic process	biological_process	1	83	1	151	0	0	1.819277108	Q3TIA9
GO:0006541	glutamine metabolic process	biological_process	1	83	1	151	0	0	1.819277108	Q3TIA9
GO:0008652	cellular amino acid biosynthetic process	biological_process	1	83	1	151	0	0	1.819277108	Q3TIA9
GO:0009064	glutamine family amino acid metabolic process	biological_process	2	83	2	151	0	0	1.819277108	Q3TIA9; Q3UEH2
GO:0009066	aspartate family amino acid metabolic process	biological_process	1	83	1	151	0	0	1.819277108	Q3TIA9
GO:0009067	aspartate family amino acid biosynthetic process	biological_process	1	83	1	151	0	0	1.819277108	Q3TIA9
GO:0009612	response to mechanical stimulus	biological_process	2	83	2	151	0	0	1.819277108	Q3TIA9; Q8K173
GO:0016884	carbon-nitrogen ligase activity, with glutamine as amido-N-donor	molecular_function	1	83	1	151	0	0	1.819277108	Q3TIA9
GO:0031427	response to methotrexate	biological_process	1	83	1	151	0	0	1.819277108	Q3TIA9
GO:0032354	response to follicle-stimulating hormone	biological_process	1	83	1	151	0	0	1.819277108	Q3TIA9
GO:0034698	response to gonadotropin	biological_process	1	83	1	151	0	0	1.819277108	Q3TIA9
GO:0042149	cellular response to glucose starvation	biological_process	1	83	1	151	0	0	1.819277108	Q3TIA9
GO:0070981	L-asparagine biosynthetic process	biological_process	1	83	1	151	0	0	1.819277108	Q3TIA9
GO:0070982	L-asparagine metabolic process	biological_process	1	83	1	151	0	0	1.819277108	Q3TIA9
GO:1901607	alpha-amino acid biosynthetic process	biological_process	1	83	1	151	0	0	1.819277108	Q3TIA9
GO:0000578	embryonic axis specification	biological_process	1	83	1	151	0	0	1.819277108	A0A0A6YWT3
GO:0001935	endothelial cell proliferation	biological_process	1	83	1	151	0	0	1.819277108	A0A0A6YWT3
GO:0001936	regulation of endothelial cell proliferation	biological_process	1	83	1	151	0	0	1.819277108	A0A0A6YWT3
GO:0001938	positive regulation of endothelial cell proliferation	biological_process	1	83	1	151	0	0	1.819277108	A0A0A6YWT3
GO:0002043	blood vessel endothelial cell proliferation involved in sprouting angiogenesis	biological_process	1	83	1	151	0	0	1.819277108	A0A0A6YWT3
GO:0009798	axis specification	biological_process	3	83	3	151	0	0	1.819277108	A0A0A6YWT3; G5E8N3; A2ARV4
GO:0009880	embryonic pattern specification	biological_process	1	83	1	151	0	0	1.819277108	A0A0A6YWT3
GO:0009948	anterior/posterior axis specification	biological_process	1	83	1	151	0	0	1.819277108	A0A0A6YWT3
GO:0014807	regulation of somitogenesis	biological_process	1	83	1	151	0	0	1.819277108	A0A0A6YWT3
GO:0030177	positive regulation of Wnt signaling pathway	biological_process	2	83	2	151	0	0	1.819277108	A0A0A6YWT3; Q3ULL0
GO:0032525	somite rostral/caudal axis specification	biological_process	1	83	1	151	0	0	1.819277108	A0A0A6YWT3
GO:0045581	negative regulation of T cell differentiation	biological_process	1	83	1	151	0	0	1.819277108	A0A0A6YWT3
GO:0045620	negative regulation of lymphocyte differentiation	biological_process	1	83	1	151	0	0	1.819277108	A0A0A6YWT3
GO:0045746	negative regulation of Notch signaling pathway	biological_process	1	83	1	151	0	0	1.819277108	A0A0A6YWT3
GO:0045992	negative regulation of embryonic development	biological_process	1	83	1	151	0	0	1.819277108	A0A0A6YWT3
GO:0045995	regulation of embryonic development	biological_process	1	83	1	151	0	0	1.819277108	A0A0A6YWT3
GO:0090263	positive regulation of canonical Wnt signaling pathway	biological_process	1	83	1	151	0	0	1.819277108	A0A0A6YWT3
GO:1902359	Notch signaling pathway involved in somitogenesis	biological_process	1	83	1	151	0	0	1.819277108	A0A0A6YWT3
GO:1902366	regulation of Notch signaling pathway involved in somitogenesis	biological_process	1	83	1	151	0	0	1.819277108	A0A0A6YWT3
GO:1902367	negative regulation of Notch signaling pathway involved in somitogenesis	biological_process	1	83	1	151	0	0	1.819277108	A0A0A6YWT3
GO:0001669	acrosomal vesicle	cellular_component	1	83	1	151	0	0	1.819277108	Q3UN62
GO:0007281	germ cell development	biological_process	2	83	2	151	0	0	1.819277108	Q3UN62; Q62488
GO:0007286	spermatid development	biological_process	2	83	2	151	0	0	1.819277108	Q3UN62; Q62488
GO:0009566	fertilization	biological_process	1	83	1	151	0	0	1.819277108	Q3UN62
GO:0022412	cellular process involved in reproduction in multicellular organism	biological_process	2	83	2	151	0	0	1.819277108	Q3UN62; Q62488
GO:0048240	sperm capacitation	biological_process	1	83	1	151	0	0	1.819277108	Q3UN62
GO:0048469	cell maturation	biological_process	1	83	1	151	0	0	1.819277108	Q3UN62
GO:0048515	spermatid differentiation	biological_process	2	83	2	151	0	0	1.819277108	Q3UN62; Q62488
GO:0097223	sperm part	cellular_component	1	83	1	151	0	0	1.819277108	Q3UN62
GO:0038191	neuropilin binding	molecular_function	1	83	1	151	0	0	1.819277108	A2ABP5
GO:0050919	negative chemotaxis	biological_process	1	83	1	151	0	0	1.819277108	A2ABP5
GO:0001523	retinoid metabolic process	biological_process	1	83	1	151	0	0	1.819277108	A7YL62
GO:0001816	cytokine production	biological_process	3	83	3	151	0	0	1.819277108	A7YL62; Q8CCC2; P19157
GO:0001817	regulation of cytokine production	biological_process	3	83	3	151	0	0	1.819277108	A7YL62; Q8CCC2; P19157
GO:0001818	negative regulation of cytokine production	biological_process	3	83	3	151	0	0	1.819277108	A7YL62; Q8CCC2; P19157
GO:0001819	positive regulation of cytokine production	biological_process	2	83	2	151	0	0	1.819277108	A7YL62; Q8CCC2
GO:0002367	cytokine production involved in immune response	biological_process	2	83	2	151	0	0	1.819277108	A7YL62; Q8CCC2
GO:0002374	cytokine secretion involved in immune response	biological_process	1	83	1	151	0	0	1.819277108	A7YL62
GO:0002440	production of molecular mediator of immune response	biological_process	2	83	2	151	0	0	1.819277108	A7YL62; Q8CCC2
GO:0002700	regulation of production of molecular mediator of immune response	biological_process	1	83	1	151	0	0	1.819277108	A7YL62
GO:0002701	negative regulation of production of molecular mediator of immune response	biological_process	1	83	1	151	0	0	1.819277108	A7YL62
GO:0002718	regulation of cytokine production involved in immune response	biological_process	1	83	1	151	0	0	1.819277108	A7YL62
GO:0002719	negative regulation of cytokine production involved in immune response	biological_process	1	83	1	151	0	0	1.819277108	A7YL62
GO:0002739	regulation of cytokine secretion involved in immune response	biological_process	1	83	1	151	0	0	1.819277108	A7YL62
GO:0002740	negative regulation of cytokine secretion involved in immune response	biological_process	1	83	1	151	0	0	1.819277108	A7YL62
GO:0008035	high-density lipoprotein particle binding	molecular_function	1	83	1	151	0	0	1.819277108	A7YL62
GO:0010872	regulation of cholesterol esterification	biological_process	1	83	1	151	0	0	1.819277108	A7YL62
GO:0010873	positive regulation of cholesterol esterification	biological_process	1	83	1	151	0	0	1.819277108	A7YL62
GO:0010901	regulation of very-low-density lipoprotein particle remodeling	biological_process	1	83	1	151	0	0	1.819277108	A7YL62
GO:0010903	negative regulation of very-low-density lipoprotein particle remodeling	biological_process	1	83	1	151	0	0	1.819277108	A7YL62
GO:0015248	sterol transporter activity	molecular_function	1	83	1	151	0	0	1.819277108	A7YL62
GO:0015485	cholesterol binding	molecular_function	1	83	1	151	0	0	1.819277108	A7YL62
GO:0015748	organophosphate ester transport	biological_process	1	83	1	151	0	0	1.819277108	A7YL62
GO:0015759	beta-glucoside transport	biological_process	1	83	1	151	0	0	1.819277108	A7YL62
GO:0015850	organic hydroxy compound transport	biological_process	1	83	1	151	0	0	1.819277108	A7YL62
GO:0015914	phospholipid transport	biological_process	1	83	1	151	0	0	1.819277108	A7YL62
GO:0015918	sterol transport	biological_process	1	83	1	151	0	0	1.819277108	A7YL62
GO:0017127	cholesterol transporter activity	molecular_function	1	83	1	151	0	0	1.819277108	A7YL62
GO:0018206	peptidyl-methionine modification	biological_process	1	83	1	151	0	0	1.819277108	A7YL62
GO:0019218	regulation of steroid metabolic process	biological_process	1	83	1	151	0	0	1.819277108	A7YL62
GO:0030258	lipid modification	biological_process	1	83	1	151	0	0	1.819277108	A7YL62
GO:0030299	intestinal cholesterol absorption	biological_process	1	83	1	151	0	0	1.819277108	A7YL62
GO:0030300	regulation of intestinal cholesterol absorption	biological_process	1	83	1	151	0	0	1.819277108	A7YL62
GO:0030301	cholesterol transport	biological_process	1	83	1	151	0	0	1.819277108	A7YL62
GO:0031100	animal organ regeneration	biological_process	4	83	4	151	0	0	1.819277108	A7YL62; F8WH42; P07724; P19157
GO:0031210	phosphatidylcholine binding	molecular_function	1	83	1	151	0	0	1.819277108	A7YL62
GO:0032368	regulation of lipid transport	biological_process	1	83	1	151	0	0	1.819277108	A7YL62
GO:0032369	negative regulation of lipid transport	biological_process	1	83	1	151	0	0	1.819277108	A7YL62
GO:0032371	regulation of sterol transport	biological_process	1	83	1	151	0	0	1.819277108	A7YL62
GO:0032372	negative regulation of sterol transport	biological_process	1	83	1	151	0	0	1.819277108	A7YL62
GO:0032374	regulation of cholesterol transport	biological_process	1	83	1	151	0	0	1.819277108	A7YL62
GO:0032375	negative regulation of cholesterol transport	biological_process	1	83	1	151	0	0	1.819277108	A7YL62
GO:0032410	negative regulation of transporter activity	biological_process	1	83	1	151	0	0	1.819277108	A7YL62
GO:0032637	interleukin-8 production	biological_process	1	83	1	151	0	0	1.819277108	A7YL62
GO:0032677	regulation of interleukin-8 production	biological_process	1	83	1	151	0	0	1.819277108	A7YL62
GO:0032757	positive regulation of interleukin-8 production	biological_process	1	83	1	151	0	0	1.819277108	A7YL62
GO:0032934	sterol binding	molecular_function	1	83	1	151	0	0	1.819277108	A7YL62
GO:0033344	cholesterol efflux	biological_process	1	83	1	151	0	0	1.819277108	A7YL62
GO:0033700	phospholipid efflux	biological_process	1	83	1	151	0	0	1.819277108	A7YL62
GO:0034190	apolipoprotein receptor binding	molecular_function	1	83	1	151	0	0	1.819277108	A7YL62
GO:0034366	spherical high-density lipoprotein particle	cellular_component	1	83	1	151	0	0	1.819277108	A7YL62
GO:0034367	macromolecular complex remodeling	biological_process	1	83	1	151	0	0	1.819277108	A7YL62
GO:0034368	protein-lipid complex remodeling	biological_process	1	83	1	151	0	0	1.819277108	A7YL62
GO:0034369	plasma lipoprotein particle remodeling	biological_process	1	83	1	151	0	0	1.819277108	A7YL62
GO:0034370	triglyceride-rich lipoprotein particle remodeling	biological_process	1	83	1	151	0	0	1.819277108	A7YL62
GO:0034372	very-low-density lipoprotein particle remodeling	biological_process	1	83	1	151	0	0	1.819277108	A7YL62
GO:0034374	low-density lipoprotein particle remodeling	biological_process	1	83	1	151	0	0	1.819277108	A7YL62
GO:0034375	high-density lipoprotein particle remodeling	biological_process	1	83	1	151	0	0	1.819277108	A7YL62
GO:0034377	plasma lipoprotein particle assembly	biological_process	1	83	1	151	0	0	1.819277108	A7YL62
GO:0034380	high-density lipoprotein particle assembly	biological_process	1	83	1	151	0	0	1.819277108	A7YL62
GO:0034384	high-density lipoprotein particle clearance	biological_process	1	83	1	151	0	0	1.819277108	A7YL62
GO:0034433	steroid esterification	biological_process	1	83	1	151	0	0	1.819277108	A7YL62
GO:0034434	sterol esterification	biological_process	1	83	1	151	0	0	1.819277108	A7YL62
GO:0034435	cholesterol esterification	biological_process	1	83	1	151	0	0	1.819277108	A7YL62
GO:0035376	sterol import	biological_process	1	83	1	151	0	0	1.819277108	A7YL62
GO:0035382	sterol transmembrane transport	biological_process	1	83	1	151	0	0	1.819277108	A7YL62
GO:0042035	regulation of cytokine biosynthetic process	biological_process	2	83	2	151	0	0	1.819277108	A7YL62; Q8CCC2
GO:0042089	cytokine biosynthetic process	biological_process	2	83	2	151	0	0	1.819277108	A7YL62; Q8CCC2
GO:0042107	cytokine metabolic process	biological_process	2	83	2	151	0	0	1.819277108	A7YL62; Q8CCC2
GO:0042108	positive regulation of cytokine biosynthetic process	biological_process	2	83	2	151	0	0	1.819277108	A7YL62; Q8CCC2
GO:0042157	lipoprotein metabolic process	biological_process	1	83	1	151	0	0	1.819277108	A7YL62
GO:0042228	interleukin-8 biosynthetic process	biological_process	1	83	1	151	0	0	1.819277108	A7YL62
GO:0042627	chylomicron	cellular_component	1	83	1	151	0	0	1.819277108	A7YL62
GO:0042632	cholesterol homeostasis	biological_process	1	83	1	151	0	0	1.819277108	A7YL62
GO:0042946	glucoside transport	biological_process	1	83	1	151	0	0	1.819277108	A7YL62
GO:0043178	alcohol binding	molecular_function	1	83	1	151	0	0	1.819277108	A7YL62
GO:0043691	reverse cholesterol transport	biological_process	1	83	1	151	0	0	1.819277108	A7YL62
GO:0044058	regulation of digestive system process	biological_process	1	83	1	151	0	0	1.819277108	A7YL62
GO:0044241	lipid digestion	biological_process	1	83	1	151	0	0	1.819277108	A7YL62
GO:0045414	regulation of interleukin-8 biosynthetic process	biological_process	1	83	1	151	0	0	1.819277108	A7YL62
GO:0045416	positive regulation of interleukin-8 biosynthetic process	biological_process	1	83	1	151	0	0	1.819277108	A7YL62
GO:0045940	positive regulation of steroid metabolic process	biological_process	1	83	1	151	0	0	1.819277108	A7YL62
GO:0046339	diacylglycerol metabolic process	biological_process	1	83	1	151	0	0	1.819277108	A7YL62
GO:0046340	diacylglycerol catabolic process	biological_process	1	83	1	151	0	0	1.819277108	A7YL62
GO:0046461	neutral lipid catabolic process	biological_process	1	83	1	151	0	0	1.819277108	A7YL62
GO:0046464	acylglycerol catabolic process	biological_process	1	83	1	151	0	0	1.819277108	A7YL62
GO:0050663	cytokine secretion	biological_process	1	83	1	151	0	0	1.819277108	A7YL62
GO:0050707	regulation of cytokine secretion	biological_process	1	83	1	151	0	0	1.819277108	A7YL62
GO:0050710	negative regulation of cytokine secretion	biological_process	1	83	1	151	0	0	1.819277108	A7YL62
GO:0050994	regulation of lipid catabolic process	biological_process	1	83	1	151	0	0	1.819277108	A7YL62
GO:0050995	negative regulation of lipid catabolic process	biological_process	1	83	1	151	0	0	1.819277108	A7YL62
GO:0050996	positive regulation of lipid catabolic process	biological_process	1	83	1	151	0	0	1.819277108	A7YL62
GO:0050997	quaternary ammonium group binding	molecular_function	1	83	1	151	0	0	1.819277108	A7YL62
GO:0055088	lipid homeostasis	biological_process	1	83	1	151	0	0	1.819277108	A7YL62
GO:0055092	sterol homeostasis	biological_process	1	83	1	151	0	0	1.819277108	A7YL62
GO:0055102	lipase inhibitor activity	molecular_function	1	83	1	151	0	0	1.819277108	A7YL62
GO:0060192	negative regulation of lipase activity	biological_process	1	83	1	151	0	0	1.819277108	A7YL62
GO:0060228	phosphatidylcholine-sterol O-acyltransferase activator activity	molecular_function	1	83	1	151	0	0	1.819277108	A7YL62
GO:0060620	regulation of cholesterol import	biological_process	1	83	1	151	0	0	1.819277108	A7YL62
GO:0060621	negative regulation of cholesterol import	biological_process	1	83	1	151	0	0	1.819277108	A7YL62
GO:0060694	regulation of cholesterol transporter activity	biological_process	1	83	1	151	0	0	1.819277108	A7YL62
GO:0060695	negative regulation of cholesterol transporter activity	biological_process	1	83	1	151	0	0	1.819277108	A7YL62
GO:0065005	protein-lipid complex assembly	biological_process	1	83	1	151	0	0	1.819277108	A7YL62
GO:0070325	lipoprotein particle receptor binding	molecular_function	2	83	2	151	0	0	1.819277108	A7YL62; A2ARV4
GO:0070405	ammonium ion binding	molecular_function	1	83	1	151	0	0	1.819277108	A7YL62
GO:0070508	cholesterol import	biological_process	1	83	1	151	0	0	1.819277108	A7YL62
GO:0070653	high-density lipoprotein particle receptor binding	molecular_function	1	83	1	151	0	0	1.819277108	A7YL62
GO:0071813	lipoprotein particle binding	molecular_function	1	83	1	151	0	0	1.819277108	A7YL62
GO:0071814	protein-lipid complex binding	molecular_function	1	83	1	151	0	0	1.819277108	A7YL62
GO:0071825	protein-lipid complex subunit organization	biological_process	1	83	1	151	0	0	1.819277108	A7YL62
GO:0071827	plasma lipoprotein particle organization	biological_process	1	83	1	151	0	0	1.819277108	A7YL62
GO:1901264	carbohydrate derivative transport	biological_process	1	83	1	151	0	0	1.819277108	A7YL62
GO:1901656	glycoside transport	biological_process	1	83	1	151	0	0	1.819277108	A7YL62
GO:1904478	regulation of intestinal absorption	biological_process	1	83	1	151	0	0	1.819277108	A7YL62
GO:1904729	regulation of intestinal lipid absorption	biological_process	1	83	1	151	0	0	1.819277108	A7YL62
GO:2000909	regulation of sterol import	biological_process	1	83	1	151	0	0	1.819277108	A7YL62
GO:2000910	negative regulation of sterol import	biological_process	1	83	1	151	0	0	1.819277108	A7YL62
GO:0008131	primary amine oxidase activity	molecular_function	1	83	1	151	0	0	1.819277108	Q6WIZ7
GO:0016638	oxidoreductase activity, acting on the CH-NH2 group of donors	molecular_function	1	83	1	151	0	0	1.819277108	Q6WIZ7
GO:0016641	oxidoreductase activity, acting on the CH-NH2 group of donors, oxygen as acceptor	molecular_function	1	83	1	151	0	0	1.819277108	Q6WIZ7
GO:0048038	quinone binding	molecular_function	1	83	1	151	0	0	1.819277108	Q6WIZ7
GO:0005200	structural constituent of cytoskeleton	molecular_function	2	83	2	151	0	0	1.819277108	Q9Z2K1; O55124
GO:0051546	keratinocyte migration	biological_process	1	83	1	151	0	0	1.819277108	Q9Z2K1
GO:0061436	establishment of skin barrier	biological_process	1	83	1	151	0	0	1.819277108	Q9Z2K1
GO:0005201	extracellular matrix structural constituent	molecular_function	1	83	1	151	0	0	1.819277108	Q8K173
GO:0005583	fibrillar collagen trimer	cellular_component	1	83	1	151	0	0	1.819277108	Q8K173
GO:0005586	collagen type III trimer	cellular_component	1	83	1	151	0	0	1.819277108	Q8K173
GO:0007178	transmembrane receptor protein serine/threonine kinase signaling pathway	biological_process	3	83	3	151	0	0	1.819277108	Q8K173; P07724; A2ARV4
GO:0007179	transforming growth factor beta receptor signaling pathway	biological_process	1	83	1	151	0	0	1.819277108	Q8K173
GO:0007229	integrin-mediated signaling pathway	biological_process	1	83	1	151	0	0	1.819277108	Q8K173
GO:0018149	peptide cross-linking	biological_process	2	83	2	151	0	0	1.819277108	Q8K173; A0A0R4J293
GO:0021987	cerebral cortex development	biological_process	1	83	1	151	0	0	1.819277108	Q8K173
GO:0035025	positive regulation of Rho protein signal transduction	biological_process	1	83	1	151	0	0	1.819277108	Q8K173
GO:0035904	aorta development	biological_process	3	83	3	151	0	0	1.819277108	Q8K173; Q9CVL5; A2ARV4
GO:0035909	aorta morphogenesis	biological_process	1	83	1	151	0	0	1.819277108	Q8K173
GO:0043206	extracellular fibril organization	biological_process	1	83	1	151	0	0	1.819277108	Q8K173
GO:0046579	positive regulation of Ras protein signal transduction	biological_process	1	83	1	151	0	0	1.819277108	Q8K173
GO:0048407	platelet-derived growth factor binding	molecular_function	1	83	1	151	0	0	1.819277108	Q8K173
GO:0048644	muscle organ morphogenesis	biological_process	3	83	3	151	0	0	1.819277108	Q8K173; F8WH42; A2ARV4
GO:0048745	smooth muscle tissue development	biological_process	1	83	1	151	0	0	1.819277108	Q8K173
GO:0048844	artery morphogenesis	biological_process	2	83	2	151	0	0	1.819277108	Q8K173; A2ARV4
GO:0051057	positive regulation of small GTPase mediated signal transduction	biological_process	1	83	1	151	0	0	1.819277108	Q8K173
GO:0060414	aorta smooth muscle tissue morphogenesis	biological_process	1	83	1	151	0	0	1.819277108	Q8K173
GO:0060415	muscle tissue morphogenesis	biological_process	2	83	2	151	0	0	1.819277108	Q8K173; A2ARV4
GO:0060840	artery development	biological_process	3	83	3	151	0	0	1.819277108	Q8K173; Q9CVL5; A2ARV4
GO:0071559	response to transforming growth factor beta	biological_process	1	83	1	151	0	0	1.819277108	Q8K173
GO:0071560	cellular response to transforming growth factor beta stimulus	biological_process	1	83	1	151	0	0	1.819277108	Q8K173
GO:0098643	banded collagen fibril	cellular_component	1	83	1	151	0	0	1.819277108	Q8K173
GO:0098644	complex of collagen trimers	cellular_component	1	83	1	151	0	0	1.819277108	Q8K173
GO:2001223	negative regulation of neuron migration	biological_process	1	83	1	151	0	0	1.819277108	Q8K173
GO:0002544	chronic inflammatory response	biological_process	3	83	3	151	0	0	1.819277108	Q3UEK0; P27005; P31725
GO:0006766	vitamin metabolic process	biological_process	2	83	2	151	0	0	1.819277108	Q3UEK0; A2ARV4
GO:0006767	water-soluble vitamin metabolic process	biological_process	1	83	1	151	0	0	1.819277108	Q3UEK0
GO:0015939	pantothenate metabolic process	biological_process	1	83	1	151	0	0	1.819277108	Q3UEK0
GO:0016810	hydrolase activity, acting on carbon-nitrogen (but not peptide) bonds	molecular_function	1	83	1	151	0	0	1.819277108	Q3UEK0
GO:0016811	hydrolase activity, acting on carbon-nitrogen (but not peptide) bonds, in linear amides	molecular_function	1	83	1	151	0	0	1.819277108	Q3UEK0
GO:0017159	pantetheine hydrolase activity	molecular_function	1	83	1	151	0	0	1.819277108	Q3UEK0
GO:0031225	anchored component of membrane	cellular_component	1	83	1	151	0	0	1.819277108	Q3UEK0
GO:0033081	regulation of T cell differentiation in thymus	biological_process	1	83	1	151	0	0	1.819277108	Q3UEK0
GO:0033089	positive regulation of T cell differentiation in thymus	biological_process	1	83	1	151	0	0	1.819277108	Q3UEK0
GO:0034235	GPI anchor binding	molecular_function	1	83	1	151	0	0	1.819277108	Q3UEK0
GO:0051861	glycolipid binding	molecular_function	1	83	1	151	0	0	1.819277108	Q3UEK0
GO:2000398	regulation of thymocyte aggregation	biological_process	1	83	1	151	0	0	1.819277108	Q3UEK0
GO:2000400	positive regulation of thymocyte aggregation	biological_process	1	83	1	151	0	0	1.819277108	Q3UEK0
GO:0004181	metallocarboxypeptidase activity	molecular_function	1	83	1	151	0	0	1.819277108	Q7TPZ8
GO:0008235	metalloexopeptidase activity	molecular_function	1	83	1	151	0	0	1.819277108	Q7TPZ8
GO:0000075	cell cycle checkpoint	biological_process	2	83	2	151	0	0	1.819277108	Q9CZW2; F6RX08
GO:0000077	DNA damage checkpoint	biological_process	1	83	1	151	0	0	1.819277108	Q9CZW2
GO:0000082	G1/S transition of mitotic cell cycle	biological_process	2	83	2	151	0	0	1.819277108	Q9CZW2; A2ACL2
GO:0006977	DNA damage response, signal transduction by p53 class mediator resulting in cell cycle arrest	biological_process	1	83	1	151	0	0	1.819277108	Q9CZW2
GO:0007050	cell cycle arrest	biological_process	2	83	2	151	0	0	1.819277108	Q9CZW2; Q8CCC2
GO:0007093	mitotic cell cycle checkpoint	biological_process	2	83	2	151	0	0	1.819277108	Q9CZW2; F6RX08
GO:0010948	negative regulation of cell cycle process	biological_process	3	83	3	151	0	0	1.819277108	Q9CZW2; F6RX08; F8WH42
GO:0030330	DNA damage response, signal transduction by p53 class mediator	biological_process	1	83	1	151	0	0	1.819277108	Q9CZW2
GO:0031570	DNA integrity checkpoint	biological_process	1	83	1	151	0	0	1.819277108	Q9CZW2
GO:0031571	mitotic G1 DNA damage checkpoint	biological_process	1	83	1	151	0	0	1.819277108	Q9CZW2
GO:0042770	signal transduction in response to DNA damage	biological_process	1	83	1	151	0	0	1.819277108	Q9CZW2
GO:0044773	mitotic DNA damage checkpoint	biological_process	1	83	1	151	0	0	1.819277108	Q9CZW2
GO:0044774	mitotic DNA integrity checkpoint	biological_process	1	83	1	151	0	0	1.819277108	Q9CZW2
GO:0044783	G1 DNA damage checkpoint	biological_process	1	83	1	151	0	0	1.819277108	Q9CZW2
GO:0044819	mitotic G1/S transition checkpoint	biological_process	1	83	1	151	0	0	1.819277108	Q9CZW2
GO:0044843	cell cycle G1/S phase transition	biological_process	2	83	2	151	0	0	1.819277108	Q9CZW2; A2ACL2
GO:0045930	negative regulation of mitotic cell cycle	biological_process	2	83	2	151	0	0	1.819277108	Q9CZW2; F6RX08
GO:0071156	regulation of cell cycle arrest	biological_process	1	83	1	151	0	0	1.819277108	Q9CZW2
GO:0071158	positive regulation of cell cycle arrest	biological_process	1	83	1	151	0	0	1.819277108	Q9CZW2
GO:0072395	signal transduction involved in cell cycle checkpoint	biological_process	1	83	1	151	0	0	1.819277108	Q9CZW2
GO:0072401	signal transduction involved in DNA integrity checkpoint	biological_process	1	83	1	151	0	0	1.819277108	Q9CZW2
GO:0072413	signal transduction involved in mitotic cell cycle checkpoint	biological_process	1	83	1	151	0	0	1.819277108	Q9CZW2
GO:0072422	signal transduction involved in DNA damage checkpoint	biological_process	1	83	1	151	0	0	1.819277108	Q9CZW2
GO:0072431	signal transduction involved in mitotic G1 DNA damage checkpoint	biological_process	1	83	1	151	0	0	1.819277108	Q9CZW2
GO:1901988	negative regulation of cell cycle phase transition	biological_process	2	83	2	151	0	0	1.819277108	Q9CZW2; F6RX08
GO:1901991	negative regulation of mitotic cell cycle phase transition	biological_process	2	83	2	151	0	0	1.819277108	Q9CZW2; F6RX08
GO:1902043	positive regulation of extrinsic apoptotic signaling pathway via death domain receptors	biological_process	1	83	1	151	0	0	1.819277108	Q9CZW2
GO:1902400	intracellular signal transduction involved in G1 DNA damage checkpoint	biological_process	1	83	1	151	0	0	1.819277108	Q9CZW2
GO:1902402	signal transduction involved in mitotic DNA damage checkpoint	biological_process	1	83	1	151	0	0	1.819277108	Q9CZW2
GO:1902403	signal transduction involved in mitotic DNA integrity checkpoint	biological_process	1	83	1	151	0	0	1.819277108	Q9CZW2
GO:1902806	regulation of cell cycle G1/S phase transition	biological_process	1	83	1	151	0	0	1.819277108	Q9CZW2
GO:1902807	negative regulation of cell cycle G1/S phase transition	biological_process	1	83	1	151	0	0	1.819277108	Q9CZW2
GO:2000045	regulation of G1/S transition of mitotic cell cycle	biological_process	1	83	1	151	0	0	1.819277108	Q9CZW2
GO:2000134	negative regulation of G1/S transition of mitotic cell cycle	biological_process	1	83	1	151	0	0	1.819277108	Q9CZW2
GO:2001238	positive regulation of extrinsic apoptotic signaling pathway	biological_process	1	83	1	151	0	0	1.819277108	Q9CZW2
GO:0000932	P-body	cellular_component	1	83	1	151	0	0	1.819277108	A2ACL2
GO:0008543	fibroblast growth factor receptor signaling pathway	biological_process	1	83	1	151	0	0	1.819277108	A2ACL2
GO:0016441	posttranscriptional gene silencing	biological_process	1	83	1	151	0	0	1.819277108	A2ACL2
GO:0016458	gene silencing	biological_process	1	83	1	151	0	0	1.819277108	A2ACL2
GO:0030371	translation repressor activity	molecular_function	1	83	1	151	0	0	1.819277108	A2ACL2
GO:0031047	gene silencing by RNA	biological_process	1	83	1	151	0	0	1.819277108	A2ACL2
GO:0031050	dsRNA fragmentation	biological_process	1	83	1	151	0	0	1.819277108	A2ACL2
GO:0035194	posttranscriptional gene silencing by RNA	biological_process	1	83	1	151	0	0	1.819277108	A2ACL2
GO:0035195	gene silencing by miRNA	biological_process	1	83	1	151	0	0	1.819277108	A2ACL2
GO:0035196	production of miRNAs involved in gene silencing by miRNA	biological_process	1	83	1	151	0	0	1.819277108	A2ACL2
GO:0035198	miRNA binding	molecular_function	1	83	1	151	0	0	1.819277108	A2ACL2
GO:0035278	miRNA mediated inhibition of translation	biological_process	1	83	1	151	0	0	1.819277108	A2ACL2
GO:0040033	negative regulation of translation, ncRNA-mediated	biological_process	1	83	1	151	0	0	1.819277108	A2ACL2
GO:0043331	response to dsRNA	biological_process	1	83	1	151	0	0	1.819277108	A2ACL2
GO:0044344	cellular response to fibroblast growth factor stimulus	biological_process	1	83	1	151	0	0	1.819277108	A2ACL2
GO:0045182	translation regulator activity	molecular_function	1	83	1	151	0	0	1.819277108	A2ACL2
GO:0045974	regulation of translation, ncRNA-mediated	biological_process	1	83	1	151	0	0	1.819277108	A2ACL2
GO:0060147	regulation of posttranscriptional gene silencing	biological_process	1	83	1	151	0	0	1.819277108	A2ACL2
GO:0060148	positive regulation of posttranscriptional gene silencing	biological_process	1	83	1	151	0	0	1.819277108	A2ACL2
GO:0060964	regulation of gene silencing by miRNA	biological_process	1	83	1	151	0	0	1.819277108	A2ACL2
GO:0060966	regulation of gene silencing by RNA	biological_process	1	83	1	151	0	0	1.819277108	A2ACL2
GO:0060968	regulation of gene silencing	biological_process	1	83	1	151	0	0	1.819277108	A2ACL2
GO:0070918	production of small RNA involved in gene silencing by RNA	biological_process	1	83	1	151	0	0	1.819277108	A2ACL2
GO:0071359	cellular response to dsRNA	biological_process	1	83	1	151	0	0	1.819277108	A2ACL2
GO:0071774	response to fibroblast growth factor	biological_process	1	83	1	151	0	0	1.819277108	A2ACL2
GO:0072089	stem cell proliferation	biological_process	1	83	1	151	0	0	1.819277108	A2ACL2
GO:2000177	regulation of neural precursor cell proliferation	biological_process	2	83	2	151	0	0	1.819277108	A2ACL2; A2ARV4
GO:2000637	positive regulation of gene silencing by miRNA	biological_process	1	83	1	151	0	0	1.819277108	A2ACL2
GO:0002523	leukocyte migration involved in inflammatory response	biological_process	2	83	2	151	0	0	1.819277108	P27005; P31725
GO:0002793	positive regulation of peptide secretion	biological_process	3	83	3	151	0	0	1.819277108	P27005; F8WH42; P31725
GO:0010043	response to zinc ion	biological_process	2	83	2	151	0	0	1.819277108	P27005; P31725
GO:0017014	protein nitrosylation	biological_process	2	83	2	151	0	0	1.819277108	P27005; P31725
GO:0018119	peptidyl-cysteine S-nitrosylation	biological_process	2	83	2	151	0	0	1.819277108	P27005; P31725
GO:0018198	peptidyl-cysteine modification	biological_process	2	83	2	151	0	0	1.819277108	P27005; P31725
GO:0030593	neutrophil chemotaxis	biological_process	2	83	2	151	0	0	1.819277108	P27005; P31725
GO:0035325	Toll-like receptor binding	molecular_function	2	83	2	151	0	0	1.819277108	P27005; P31725
GO:0035662	Toll-like receptor 4 binding	molecular_function	2	83	2	151	0	0	1.819277108	P27005; P31725
GO:0050542	icosanoid binding	molecular_function	2	83	2	151	0	0	1.819277108	P27005; P31725
GO:0050543	icosatetraenoic acid binding	molecular_function	2	83	2	151	0	0	1.819277108	P27005; P31725
GO:0050544	arachidonic acid binding	molecular_function	2	83	2	151	0	0	1.819277108	P27005; P31725
GO:0050786	RAGE receptor binding	molecular_function	2	83	2	151	0	0	1.819277108	P27005; P31725
GO:0070488	neutrophil aggregation	biological_process	3	83	3	151	0	0	1.819277108	P27005; P31725; P19157
GO:0071621	granulocyte chemotaxis	biological_process	2	83	2	151	0	0	1.819277108	P27005; P31725
GO:0097530	granulocyte migration	biological_process	2	83	2	151	0	0	1.819277108	P27005; P31725
GO:1990266	neutrophil migration	biological_process	2	83	2	151	0	0	1.819277108	P27005; P31725
GO:2001244	positive regulation of intrinsic apoptotic signaling pathway	biological_process	2	83	2	151	0	0	1.819277108	P27005; P31725
GO:0003988	acetyl-CoA C-acyltransferase activity	molecular_function	1	83	1	151	0	0	1.819277108	Q3TUU3
GO:0016408	C-acyltransferase activity	molecular_function	1	83	1	151	0	0	1.819277108	Q3TUU3
GO:0007379	segment specification	biological_process	1	83	1	151	0	0	1.819277108	Q3ULL0
GO:0008023	transcription elongation factor complex	cellular_component	2	83	2	151	0	0	1.819277108	Q3ULL0; Q62488
GO:0070577	lysine-acetylated histone binding	molecular_function	1	83	1	151	0	0	1.819277108	Q3ULL0
GO:2000050	regulation of non-canonical Wnt signaling pathway	biological_process	1	83	1	151	0	0	1.819277108	Q3ULL0
GO:2000052	positive regulation of non-canonical Wnt signaling pathway	biological_process	1	83	1	151	0	0	1.819277108	Q3ULL0
GO:2000095	regulation of Wnt signaling pathway, planar cell polarity pathway	biological_process	1	83	1	151	0	0	1.819277108	Q3ULL0
GO:2000096	positive regulation of Wnt signaling pathway, planar cell polarity pathway	biological_process	1	83	1	151	0	0	1.819277108	Q3ULL0
GO:0030165	PDZ domain binding	molecular_function	2	83	2	151	0	0	1.819277108	Q8C7U1; A2ARV4
GO:0000011	vacuole inheritance	biological_process	1	83	1	151	0	0	1.819277108	A0A0N4SUN4
GO:0006895	Golgi to endosome transport	biological_process	1	83	1	151	0	0	1.819277108	A0A0N4SUN4
GO:0006896	Golgi to vacuole transport	biological_process	1	83	1	151	0	0	1.819277108	A0A0N4SUN4
GO:0006906	vesicle fusion	biological_process	1	83	1	151	0	0	1.819277108	A0A0N4SUN4
GO:0007030	Golgi organization	biological_process	1	83	1	151	0	0	1.819277108	A0A0N4SUN4
GO:0007033	vacuole organization	biological_process	1	83	1	151	0	0	1.819277108	A0A0N4SUN4
GO:0007034	vacuolar transport	biological_process	1	83	1	151	0	0	1.819277108	A0A0N4SUN4
GO:0007041	lysosomal transport	biological_process	1	83	1	151	0	0	1.819277108	A0A0N4SUN4
GO:0010009	cytoplasmic side of endosome membrane	cellular_component	1	83	1	151	0	0	1.819277108	A0A0N4SUN4
GO:0016197	endosomal transport	biological_process	3	83	3	151	0	0	1.819277108	A0A0N4SUN4; A2APZ1; A2ARV4
GO:0017137	Rab GTPase binding	molecular_function	1	83	1	151	0	0	1.819277108	A0A0N4SUN4
GO:0034058	endosomal vesicle fusion	biological_process	1	83	1	151	0	0	1.819277108	A0A0N4SUN4
GO:0034498	early endosome to Golgi transport	biological_process	1	83	1	151	0	0	1.819277108	A0A0N4SUN4
GO:0042147	retrograde transport, endosome to Golgi	biological_process	1	83	1	151	0	0	1.819277108	A0A0N4SUN4
GO:0044801	single-organism membrane fusion	biological_process	1	83	1	151	0	0	1.819277108	A0A0N4SUN4
GO:0045324	late endosome to vacuole transport	biological_process	1	83	1	151	0	0	1.819277108	A0A0N4SUN4
GO:0048284	organelle fusion	biological_process	1	83	1	151	0	0	1.819277108	A0A0N4SUN4
GO:0048308	organelle inheritance	biological_process	1	83	1	151	0	0	1.819277108	A0A0N4SUN4
GO:0061025	membrane fusion	biological_process	1	83	1	151	0	0	1.819277108	A0A0N4SUN4
GO:0090160	Golgi to lysosome transport	biological_process	1	83	1	151	0	0	1.819277108	A0A0N4SUN4
GO:0090174	organelle membrane fusion	biological_process	1	83	1	151	0	0	1.819277108	A0A0N4SUN4
GO:1903358	regulation of Golgi organization	biological_process	1	83	1	151	0	0	1.819277108	A0A0N4SUN4
GO:0048733	sebaceous gland development	biological_process	1	83	1	151	0	0	1.819277108	Q3UV17
GO:0001650	fibrillar center	cellular_component	2	83	2	151	0	0	1.819277108	Q62488; A0A0R4J135
GO:0035327	transcriptionally active chromatin	cellular_component	1	83	1	151	0	0	1.819277108	Q62488
GO:0044452	nucleolar part	cellular_component	2	83	2	151	0	0	1.819277108	Q62488; A0A0R4J135
GO:0047619	acylcarnitine hydrolase activity	molecular_function	1	83	1	151	0	0	1.819277108	Q91WG0
GO:0000189	MAPK import into nucleus	biological_process	1	83	1	151	0	0	1.819277108	F6RX08
GO:0000775	chromosome, centromeric region	cellular_component	1	83	1	151	0	0	1.819277108	F6RX08
GO:0000776	kinetochore	cellular_component	1	83	1	151	0	0	1.819277108	F6RX08
GO:0001672	regulation of chromatin assembly or disassembly	biological_process	1	83	1	151	0	0	1.819277108	F6RX08
GO:0005487	nucleocytoplasmic transporter activity	molecular_function	1	83	1	151	0	0	1.819277108	F6RX08
GO:0005868	cytoplasmic dynein complex	cellular_component	1	83	1	151	0	0	1.819277108	F6RX08
GO:0005875	microtubule associated complex	cellular_component	2	83	2	151	0	0	1.819277108	F6RX08; E9Q7P0
GO:0006404	RNA import into nucleus	biological_process	1	83	1	151	0	0	1.819277108	F6RX08
GO:0006405	RNA export from nucleus	biological_process	1	83	1	151	0	0	1.819277108	F6RX08
GO:0006406	mRNA export from nucleus	biological_process	1	83	1	151	0	0	1.819277108	F6RX08
GO:0006413	translational initiation	biological_process	1	83	1	151	0	0	1.819277108	F6RX08
GO:0006446	regulation of translational initiation	biological_process	1	83	1	151	0	0	1.819277108	F6RX08
GO:0006611	protein export from nucleus	biological_process	1	83	1	151	0	0	1.819277108	F6RX08
GO:0006999	nuclear pore organization	biological_process	1	83	1	151	0	0	1.819277108	F6RX08
GO:0007094	mitotic spindle assembly checkpoint	biological_process	1	83	1	151	0	0	1.819277108	F6RX08
GO:0009266	response to temperature stimulus	biological_process	1	83	1	151	0	0	1.819277108	F6RX08
GO:0009408	response to heat	biological_process	1	83	1	151	0	0	1.819277108	F6RX08
GO:0010847	regulation of chromatin assembly	biological_process	1	83	1	151	0	0	1.819277108	F6RX08
GO:0017056	structural constituent of nuclear pore	molecular_function	1	83	1	151	0	0	1.819277108	F6RX08
GO:0018995	host	cellular_component	1	83	1	151	0	0	1.819277108	F6RX08
GO:0030286	dynein complex	cellular_component	2	83	2	151	0	0	1.819277108	F6RX08; E9Q7P0
GO:0031396	regulation of protein ubiquitination	biological_process	1	83	1	151	0	0	1.819277108	F6RX08
GO:0031397	negative regulation of protein ubiquitination	biological_process	1	83	1	151	0	0	1.819277108	F6RX08
GO:0031445	regulation of heterochromatin assembly	biological_process	1	83	1	151	0	0	1.819277108	F6RX08
GO:0031453	positive regulation of heterochromatin assembly	biological_process	1	83	1	151	0	0	1.819277108	F6RX08
GO:0031507	heterochromatin assembly	biological_process	1	83	1	151	0	0	1.819277108	F6RX08
GO:0031577	spindle checkpoint	biological_process	1	83	1	151	0	0	1.819277108	F6RX08
GO:0031990	mRNA export from nucleus in response to heat stress	biological_process	1	83	1	151	0	0	1.819277108	F6RX08
GO:0032239	regulation of nucleobase-containing compound transport	biological_process	1	83	1	151	0	0	1.819277108	F6RX08
GO:0032240	negative regulation of nucleobase-containing compound transport	biological_process	1	83	1	151	0	0	1.819277108	F6RX08
GO:0032387	negative regulation of intracellular transport	biological_process	1	83	1	151	0	0	1.819277108	F6RX08
GO:0032435	negative regulation of proteasomal ubiquitin-dependent protein catabolic process	biological_process	1	83	1	151	0	0	1.819277108	F6RX08
GO:0033046	negative regulation of sister chromatid segregation	biological_process	1	83	1	151	0	0	1.819277108	F6RX08
GO:0033048	negative regulation of mitotic sister chromatid segregation	biological_process	1	83	1	151	0	0	1.819277108	F6RX08
GO:0034399	nuclear periphery	cellular_component	1	83	1	151	0	0	1.819277108	F6RX08
GO:0034605	cellular response to heat	biological_process	1	83	1	151	0	0	1.819277108	F6RX08
GO:0035455	response to interferon-alpha	biological_process	1	83	1	151	0	0	1.819277108	F6RX08
GO:0035457	cellular response to interferon-alpha	biological_process	1	83	1	151	0	0	1.819277108	F6RX08
GO:0042177	negative regulation of protein catabolic process	biological_process	1	83	1	151	0	0	1.819277108	F6RX08
GO:0042405	nuclear inclusion body	cellular_component	1	83	1	151	0	0	1.819277108	F6RX08
GO:0043495	protein anchor	molecular_function	1	83	1	151	0	0	1.819277108	F6RX08
GO:0043578	nuclear matrix organization	biological_process	1	83	1	151	0	0	1.819277108	F6RX08
GO:0043623	cellular protein complex assembly	biological_process	2	83	2	151	0	0	1.819277108	F6RX08; O55124
GO:0043657	host cell	cellular_component	1	83	1	151	0	0	1.819277108	F6RX08
GO:0044215	other organism	cellular_component	1	83	1	151	0	0	1.819277108	F6RX08
GO:0044216	other organism cell	cellular_component	1	83	1	151	0	0	1.819277108	F6RX08
GO:0044217	other organism part	cellular_component	1	83	1	151	0	0	1.819277108	F6RX08
GO:0044615	nuclear pore nuclear basket	cellular_component	1	83	1	151	0	0	1.819277108	F6RX08
GO:0045799	positive regulation of chromatin assembly or disassembly	biological_process	1	83	1	151	0	0	1.819277108	F6RX08
GO:0045839	negative regulation of mitotic nuclear division	biological_process	1	83	1	151	0	0	1.819277108	F6RX08
GO:0045841	negative regulation of mitotic metaphase/anaphase transition	biological_process	1	83	1	151	0	0	1.819277108	F6RX08
GO:0045947	negative regulation of translational initiation	biological_process	1	83	1	151	0	0	1.819277108	F6RX08
GO:0046823	negative regulation of nucleocytoplasmic transport	biological_process	1	83	1	151	0	0	1.819277108	F6RX08
GO:0046825	regulation of protein export from nucleus	biological_process	1	83	1	151	0	0	1.819277108	F6RX08
GO:0046827	positive regulation of protein export from nucleus	biological_process	1	83	1	151	0	0	1.819277108	F6RX08
GO:0046831	regulation of RNA export from nucleus	biological_process	1	83	1	151	0	0	1.819277108	F6RX08
GO:0046832	negative regulation of RNA export from nucleus	biological_process	1	83	1	151	0	0	1.819277108	F6RX08
GO:0046930	pore complex	cellular_component	1	83	1	151	0	0	1.819277108	F6RX08
GO:0046931	pore complex assembly	biological_process	1	83	1	151	0	0	1.819277108	F6RX08
GO:0051168	nuclear export	biological_process	1	83	1	151	0	0	1.819277108	F6RX08
GO:0051292	nuclear pore complex assembly	biological_process	1	83	1	151	0	0	1.819277108	F6RX08
GO:0051340	regulation of ligase activity	biological_process	1	83	1	151	0	0	1.819277108	F6RX08
GO:0051352	negative regulation of ligase activity	biological_process	1	83	1	151	0	0	1.819277108	F6RX08
GO:0051436	negative regulation of ubiquitin-protein ligase activity involved in mitotic cell cycle	biological_process	1	83	1	151	0	0	1.819277108	F6RX08
GO:0051438	regulation of ubiquitin-protein transferase activity	biological_process	1	83	1	151	0	0	1.819277108	F6RX08
GO:0051439	regulation of ubiquitin-protein ligase activity involved in mitotic cell cycle	biological_process	1	83	1	151	0	0	1.819277108	F6RX08
GO:0051444	negative regulation of ubiquitin-protein transferase activity	biological_process	1	83	1	151	0	0	1.819277108	F6RX08
GO:0051782	negative regulation of cell division	biological_process	2	83	2	151	0	0	1.819277108	F6RX08; F8WH42
GO:0051784	negative regulation of nuclear division	biological_process	2	83	2	151	0	0	1.819277108	F6RX08; F8WH42
GO:0051985	negative regulation of chromosome segregation	biological_process	1	83	1	151	0	0	1.819277108	F6RX08
GO:0060236	regulation of mitotic spindle organization	biological_process	1	83	1	151	0	0	1.819277108	F6RX08
GO:0070507	regulation of microtubule cytoskeleton organization	biological_process	1	83	1	151	0	0	1.819277108	F6RX08
GO:0070828	heterochromatin organization	biological_process	1	83	1	151	0	0	1.819277108	F6RX08
GO:0070840	dynein complex binding	molecular_function	1	83	1	151	0	0	1.819277108	F6RX08
GO:0070849	response to epidermal growth factor	biological_process	2	83	2	151	0	0	1.819277108	F6RX08; P19157
GO:0071166	ribonucleoprotein complex localization	biological_process	1	83	1	151	0	0	1.819277108	F6RX08
GO:0071173	spindle assembly checkpoint	biological_process	1	83	1	151	0	0	1.819277108	F6RX08
GO:0071174	mitotic spindle checkpoint	biological_process	1	83	1	151	0	0	1.819277108	F6RX08
GO:0071426	ribonucleoprotein complex export from nucleus	biological_process	1	83	1	151	0	0	1.819277108	F6RX08
GO:0071427	mRNA-containing ribonucleoprotein complex export from nucleus	biological_process	1	83	1	151	0	0	1.819277108	F6RX08
GO:0090169	regulation of spindle assembly	biological_process	1	83	1	151	0	0	1.819277108	F6RX08
GO:0090224	regulation of spindle organization	biological_process	1	83	1	151	0	0	1.819277108	F6RX08
GO:0090231	regulation of spindle checkpoint	biological_process	1	83	1	151	0	0	1.819277108	F6RX08
GO:0090232	positive regulation of spindle checkpoint	biological_process	1	83	1	151	0	0	1.819277108	F6RX08
GO:0090266	regulation of mitotic cell cycle spindle assembly checkpoint	biological_process	1	83	1	151	0	0	1.819277108	F6RX08
GO:0090267	positive regulation of mitotic cell cycle spindle assembly checkpoint	biological_process	1	83	1	151	0	0	1.819277108	F6RX08
GO:1901673	regulation of mitotic spindle assembly	biological_process	1	83	1	151	0	0	1.819277108	F6RX08
GO:1901799	negative regulation of proteasomal protein catabolic process	biological_process	1	83	1	151	0	0	1.819277108	F6RX08
GO:1901976	regulation of cell cycle checkpoint	biological_process	1	83	1	151	0	0	1.819277108	F6RX08
GO:1901978	positive regulation of cell cycle checkpoint	biological_process	1	83	1	151	0	0	1.819277108	F6RX08
GO:1902100	negative regulation of metaphase/anaphase transition of cell cycle	biological_process	1	83	1	151	0	0	1.819277108	F6RX08
GO:1903051	negative regulation of proteolysis involved in cellular protein catabolic process	biological_process	1	83	1	151	0	0	1.819277108	F6RX08
GO:1903320	regulation of protein modification by small protein conjugation or removal	biological_process	1	83	1	151	0	0	1.819277108	F6RX08
GO:1903321	negative regulation of protein modification by small protein conjugation or removal	biological_process	1	83	1	151	0	0	1.819277108	F6RX08
GO:1903363	negative regulation of cellular protein catabolic process	biological_process	1	83	1	151	0	0	1.819277108	F6RX08
GO:1903504	regulation of mitotic spindle checkpoint	biological_process	1	83	1	151	0	0	1.819277108	F6RX08
GO:1903650	negative regulation of cytoplasmic transport	biological_process	1	83	1	151	0	0	1.819277108	F6RX08
GO:2000816	negative regulation of mitotic sister chromatid separation	biological_process	1	83	1	151	0	0	1.819277108	F6RX08
GO:0000271	polysaccharide biosynthetic process	biological_process	1	83	1	151	0	0	1.819277108	Q3UYR9
GO:0001704	formation of primary germ layer	biological_process	1	83	1	151	0	0	1.819277108	Q3UYR9
GO:0001707	mesoderm formation	biological_process	1	83	1	151	0	0	1.819277108	Q3UYR9
GO:0006022	aminoglycan metabolic process	biological_process	1	83	1	151	0	0	1.819277108	Q3UYR9
GO:0006023	aminoglycan biosynthetic process	biological_process	1	83	1	151	0	0	1.819277108	Q3UYR9
GO:0006024	glycosaminoglycan biosynthetic process	biological_process	1	83	1	151	0	0	1.819277108	Q3UYR9
GO:0006029	proteoglycan metabolic process	biological_process	2	83	2	151	0	0	1.819277108	Q3UYR9; Q80UW0
GO:0007369	gastrulation	biological_process	1	83	1	151	0	0	1.819277108	Q3UYR9
GO:0007498	mesoderm development	biological_process	1	83	1	151	0	0	1.819277108	Q3UYR9
GO:0008375	acetylglucosaminyltransferase activity	molecular_function	1	83	1	151	0	0	1.819277108	Q3UYR9
GO:0015012	heparan sulfate proteoglycan biosynthetic process	biological_process	2	83	2	151	0	0	1.819277108	Q3UYR9; Q80UW0
GO:0015014	heparan sulfate proteoglycan biosynthetic process, polysaccharide chain biosynthetic process	biological_process	1	83	1	151	0	0	1.819277108	Q3UYR9
GO:0030166	proteoglycan biosynthetic process	biological_process	2	83	2	151	0	0	1.819277108	Q3UYR9; Q80UW0
GO:0030201	heparan sulfate proteoglycan metabolic process	biological_process	2	83	2	151	0	0	1.819277108	Q3UYR9; Q80UW0
GO:0030203	glycosaminoglycan metabolic process	biological_process	1	83	1	151	0	0	1.819277108	Q3UYR9
GO:0033692	cellular polysaccharide biosynthetic process	biological_process	1	83	1	151	0	0	1.819277108	Q3UYR9
GO:0034637	cellular carbohydrate biosynthetic process	biological_process	1	83	1	151	0	0	1.819277108	Q3UYR9
GO:0042328	heparan sulfate N-acetylglucosaminyltransferase activity	molecular_function	1	83	1	151	0	0	1.819277108	Q3UYR9
GO:0043541	UDP-N-acetylglucosamine transferase complex	cellular_component	1	83	1	151	0	0	1.819277108	Q3UYR9
GO:0048332	mesoderm morphogenesis	biological_process	1	83	1	151	0	0	1.819277108	Q3UYR9
GO:0050508	glucuronosyl-N-acetylglucosaminyl-proteoglycan 4-alpha-N-acetylglucosaminyltransferase activity	molecular_function	1	83	1	151	0	0	1.819277108	Q3UYR9
GO:0050509	N-acetylglucosaminyl-proteoglycan 4-beta-glucuronosyltransferase activity	molecular_function	1	83	1	151	0	0	1.819277108	Q3UYR9
GO:0002074	extraocular skeletal muscle development	biological_process	1	83	1	151	0	0	1.819277108	O55124
GO:0003779	actin binding	molecular_function	1	83	1	151	0	0	1.819277108	O55124
GO:0005859	muscle myosin complex	cellular_component	1	83	1	151	0	0	1.819277108	O55124
GO:0008307	structural constituent of muscle	molecular_function	1	83	1	151	0	0	1.819277108	O55124
GO:0016459	myosin complex	cellular_component	1	83	1	151	0	0	1.819277108	O55124
GO:0016460	myosin II complex	cellular_component	1	83	1	151	0	0	1.819277108	O55124
GO:0031033	myosin filament organization	biological_process	1	83	1	151	0	0	1.819277108	O55124
GO:0031034	myosin filament assembly	biological_process	1	83	1	151	0	0	1.819277108	O55124
GO:0042805	actinin binding	molecular_function	1	83	1	151	0	0	1.819277108	O55124
GO:0051015	actin filament binding	molecular_function	1	83	1	151	0	0	1.819277108	O55124
GO:0051371	muscle alpha-actinin binding	molecular_function	1	83	1	151	0	0	1.819277108	O55124
GO:0051393	alpha-actinin binding	molecular_function	1	83	1	151	0	0	1.819277108	O55124
GO:0071688	striated muscle myosin thick filament assembly	biological_process	1	83	1	151	0	0	1.819277108	O55124
GO:0008146	sulfotransferase activity	molecular_function	1	83	1	151	0	0	1.819277108	Q80UW0
GO:0015015	heparan sulfate proteoglycan biosynthetic process, enzymatic modification	biological_process	1	83	1	151	0	0	1.819277108	Q80UW0
GO:0016782	transferase activity, transferring sulfur-containing groups	molecular_function	1	83	1	151	0	0	1.819277108	Q80UW0
GO:0017095	heparan sulfate 6-O-sulfotransferase activity	molecular_function	1	83	1	151	0	0	1.819277108	Q80UW0
GO:0034483	heparan sulfate sulfotransferase activity	molecular_function	1	83	1	151	0	0	1.819277108	Q80UW0
GO:0030215	semaphorin receptor binding	molecular_function	1	83	1	151	0	0	1.819277108	Q6ZPG8
GO:0002312	B cell activation involved in immune response	biological_process	1	83	1	151	0	0	1.819277108	P16045
GO:0002313	mature B cell differentiation involved in immune response	biological_process	1	83	1	151	0	0	1.819277108	P16045
GO:0002317	plasma cell differentiation	biological_process	1	83	1	151	0	0	1.819277108	P16045
GO:0002335	mature B cell differentiation	biological_process	1	83	1	151	0	0	1.819277108	P16045
GO:0005534	galactose binding	molecular_function	1	83	1	151	0	0	1.819277108	P16045
GO:0007157	heterophilic cell-cell adhesion via plasma membrane cell adhesion molecules	biological_process	1	83	1	151	0	0	1.819277108	P16045
GO:0010977	negative regulation of neuron projection development	biological_process	1	83	1	151	0	0	1.819277108	P16045
GO:0016936	galactoside binding	molecular_function	1	83	1	151	0	0	1.819277108	P16045
GO:0030395	lactose binding	molecular_function	1	83	1	151	0	0	1.819277108	P16045
GO:0031294	lymphocyte costimulation	biological_process	1	83	1	151	0	0	1.819277108	P16045
GO:0031295	T cell costimulation	biological_process	1	83	1	151	0	0	1.819277108	P16045
GO:0031345	negative regulation of cell projection organization	biological_process	1	83	1	151	0	0	1.819277108	P16045
GO:0034117	erythrocyte aggregation	biological_process	1	83	1	151	0	0	1.819277108	P16045
GO:0034118	regulation of erythrocyte aggregation	biological_process	1	83	1	151	0	0	1.819277108	P16045
GO:0034120	positive regulation of erythrocyte aggregation	biological_process	1	83	1	151	0	0	1.819277108	P16045
GO:0035900	response to isolation stress	biological_process	1	83	1	151	0	0	1.819277108	P16045
GO:0043236	laminin binding	molecular_function	1	83	1	151	0	0	1.819277108	P16045
GO:0045185	maintenance of protein location	biological_process	1	83	1	151	0	0	1.819277108	P16045
GO:0045445	myoblast differentiation	biological_process	1	83	1	151	0	0	1.819277108	P16045
GO:0046598	positive regulation of viral entry into host cell	biological_process	1	83	1	151	0	0	1.819277108	P16045
GO:0048030	disaccharide binding	molecular_function	1	83	1	151	0	0	1.819277108	P16045
GO:0050840	extracellular matrix binding	molecular_function	1	83	1	151	0	0	1.819277108	P16045
GO:0070492	oligosaccharide binding	molecular_function	1	83	1	151	0	0	1.819277108	P16045
GO:0003955	NAD(P)H dehydrogenase (quinone) activity	molecular_function	1	83	1	151	0	0	1.819277108	Q99KL8
GO:0004784	superoxide dismutase activity	molecular_function	1	83	1	151	0	0	1.819277108	Q99KL8
GO:0016651	oxidoreductase activity, acting on NAD(P)H	molecular_function	1	83	1	151	0	0	1.819277108	Q99KL8
GO:0016655	oxidoreductase activity, acting on NAD(P)H, quinone or similar compound as acceptor	molecular_function	1	83	1	151	0	0	1.819277108	Q99KL8
GO:0016721	oxidoreductase activity, acting on superoxide radicals as acceptor	molecular_function	1	83	1	151	0	0	1.819277108	Q99KL8
GO:1904880	response to hydrogen sulfide	biological_process	1	83	1	151	0	0	1.819277108	Q99KL8
GO:0001562	response to protozoan	biological_process	1	83	1	151	0	0	1.819277108	Q8CCC2
GO:0001787	natural killer cell proliferation	biological_process	1	83	1	151	0	0	1.819277108	Q8CCC2
GO:0001866	NK T cell proliferation	biological_process	1	83	1	151	0	0	1.819277108	Q8CCC2
GO:0001910	regulation of leukocyte mediated cytotoxicity	biological_process	1	83	1	151	0	0	1.819277108	Q8CCC2
GO:0001912	positive regulation of leukocyte mediated cytotoxicity	biological_process	1	83	1	151	0	0	1.819277108	Q8CCC2
GO:0001914	regulation of T cell mediated cytotoxicity	biological_process	1	83	1	151	0	0	1.819277108	Q8CCC2
GO:0001916	positive regulation of T cell mediated cytotoxicity	biological_process	1	83	1	151	0	0	1.819277108	Q8CCC2
GO:0002228	natural killer cell mediated immunity	biological_process	1	83	1	151	0	0	1.819277108	Q8CCC2
GO:0002230	positive regulation of defense response to virus by host	biological_process	1	83	1	151	0	0	1.819277108	Q8CCC2
GO:0002323	natural killer cell activation involved in immune response	biological_process	1	83	1	151	0	0	1.819277108	Q8CCC2
GO:0002347	response to tumor cell	biological_process	1	83	1	151	0	0	1.819277108	Q8CCC2
GO:0002369	T cell cytokine production	biological_process	1	83	1	151	0	0	1.819277108	Q8CCC2
GO:0002418	immune response to tumor cell	biological_process	1	83	1	151	0	0	1.819277108	Q8CCC2
GO:0002420	natural killer cell mediated cytotoxicity directed against tumor cell target	biological_process	1	83	1	151	0	0	1.819277108	Q8CCC2
GO:0002423	natural killer cell mediated immune response to tumor cell	biological_process	1	83	1	151	0	0	1.819277108	Q8CCC2
GO:0002703	regulation of leukocyte mediated immunity	biological_process	1	83	1	151	0	0	1.819277108	Q8CCC2
GO:0002705	positive regulation of leukocyte mediated immunity	biological_process	1	83	1	151	0	0	1.819277108	Q8CCC2
GO:0002706	regulation of lymphocyte mediated immunity	biological_process	1	83	1	151	0	0	1.819277108	Q8CCC2
GO:0002708	positive regulation of lymphocyte mediated immunity	biological_process	1	83	1	151	0	0	1.819277108	Q8CCC2
GO:0002709	regulation of T cell mediated immunity	biological_process	1	83	1	151	0	0	1.819277108	Q8CCC2
GO:0002711	positive regulation of T cell mediated immunity	biological_process	1	83	1	151	0	0	1.819277108	Q8CCC2
GO:0002715	regulation of natural killer cell mediated immunity	biological_process	1	83	1	151	0	0	1.819277108	Q8CCC2
GO:0002717	positive regulation of natural killer cell mediated immunity	biological_process	1	83	1	151	0	0	1.819277108	Q8CCC2
GO:0002763	positive regulation of myeloid leukocyte differentiation	biological_process	2	83	2	151	0	0	1.819277108	Q8CCC2; F8WH42
GO:0002819	regulation of adaptive immune response	biological_process	1	83	1	151	0	0	1.819277108	Q8CCC2
GO:0002821	positive regulation of adaptive immune response	biological_process	1	83	1	151	0	0	1.819277108	Q8CCC2
GO:0002822	regulation of adaptive immune response based on somatic recombination of immune receptors built from immunoglobulin superfamily domains	biological_process	1	83	1	151	0	0	1.819277108	Q8CCC2
GO:0002824	positive regulation of adaptive immune response based on somatic recombination of immune receptors built from immunoglobulin superfamily domains	biological_process	1	83	1	151	0	0	1.819277108	Q8CCC2
GO:0002825	regulation of T-helper 1 type immune response	biological_process	1	83	1	151	0	0	1.819277108	Q8CCC2
GO:0002827	positive regulation of T-helper 1 type immune response	biological_process	1	83	1	151	0	0	1.819277108	Q8CCC2
GO:0002831	regulation of response to biotic stimulus	biological_process	1	83	1	151	0	0	1.819277108	Q8CCC2
GO:0002833	positive regulation of response to biotic stimulus	biological_process	1	83	1	151	0	0	1.819277108	Q8CCC2
GO:0002834	regulation of response to tumor cell	biological_process	1	83	1	151	0	0	1.819277108	Q8CCC2
GO:0002836	positive regulation of response to tumor cell	biological_process	1	83	1	151	0	0	1.819277108	Q8CCC2
GO:0002837	regulation of immune response to tumor cell	biological_process	1	83	1	151	0	0	1.819277108	Q8CCC2
GO:0002839	positive regulation of immune response to tumor cell	biological_process	1	83	1	151	0	0	1.819277108	Q8CCC2
GO:0002855	regulation of natural killer cell mediated immune response to tumor cell	biological_process	1	83	1	151	0	0	1.819277108	Q8CCC2
GO:0002857	positive regulation of natural killer cell mediated immune response to tumor cell	biological_process	1	83	1	151	0	0	1.819277108	Q8CCC2
GO:0002858	regulation of natural killer cell mediated cytotoxicity directed against tumor cell target	biological_process	1	83	1	151	0	0	1.819277108	Q8CCC2
GO:0002860	positive regulation of natural killer cell mediated cytotoxicity directed against tumor cell target	biological_process	1	83	1	151	0	0	1.819277108	Q8CCC2
GO:0005125	cytokine activity	molecular_function	2	83	2	151	0	0	1.819277108	Q8CCC2; F8WH42
GO:0005143	interleukin-12 receptor binding	molecular_function	1	83	1	151	0	0	1.819277108	Q8CCC2
GO:0005796	Golgi lumen	cellular_component	1	83	1	151	0	0	1.819277108	Q8CCC2
GO:0007259	JAK-STAT cascade	biological_process	2	83	2	151	0	0	1.819277108	Q8CCC2; F8WH42
GO:0007260	tyrosine phosphorylation of STAT protein	biological_process	2	83	2	151	0	0	1.819277108	Q8CCC2; F8WH42
GO:0008083	growth factor activity	molecular_function	2	83	2	151	0	0	1.819277108	Q8CCC2; F8WH42
GO:0009615	response to virus	biological_process	1	83	1	151	0	0	1.819277108	Q8CCC2
GO:0010224	response to UV-B	biological_process	1	83	1	151	0	0	1.819277108	Q8CCC2
GO:0010533	regulation of activation of Janus kinase activity	biological_process	1	83	1	151	0	0	1.819277108	Q8CCC2
GO:0010534	regulation of activation of JAK2 kinase activity	biological_process	1	83	1	151	0	0	1.819277108	Q8CCC2
GO:0010535	positive regulation of activation of JAK2 kinase activity	biological_process	1	83	1	151	0	0	1.819277108	Q8CCC2
GO:0010536	positive regulation of activation of Janus kinase activity	biological_process	1	83	1	151	0	0	1.819277108	Q8CCC2
GO:0010657	muscle cell apoptotic process	biological_process	1	83	1	151	0	0	1.819277108	Q8CCC2
GO:0010660	regulation of muscle cell apoptotic process	biological_process	1	83	1	151	0	0	1.819277108	Q8CCC2
GO:0010661	positive regulation of muscle cell apoptotic process	biological_process	1	83	1	151	0	0	1.819277108	Q8CCC2
GO:0018108	peptidyl-tyrosine phosphorylation	biological_process	3	83	3	151	0	0	1.819277108	Q8CCC2; Q8BSU1; F8WH42
GO:0018212	peptidyl-tyrosine modification	biological_process	3	83	3	151	0	0	1.819277108	Q8CCC2; Q8BSU1; F8WH42
GO:0019972	interleukin-12 binding	molecular_function	1	83	1	151	0	0	1.819277108	Q8CCC2
GO:0030101	natural killer cell activation	biological_process	2	83	2	151	0	0	1.819277108	Q8CCC2; Q9CVL5
GO:0030316	osteoclast differentiation	biological_process	1	83	1	151	0	0	1.819277108	Q8CCC2
GO:0031341	regulation of cell killing	biological_process	1	83	1	151	0	0	1.819277108	Q8CCC2
GO:0031343	positive regulation of cell killing	biological_process	1	83	1	151	0	0	1.819277108	Q8CCC2
GO:0031904	endosome lumen	cellular_component	2	83	2	151	0	0	1.819277108	Q8CCC2; A2ARV4
GO:0032604	granulocyte macrophage colony-stimulating factor production	biological_process	1	83	1	151	0	0	1.819277108	Q8CCC2
GO:0032609	interferon-gamma production	biological_process	1	83	1	151	0	0	1.819277108	Q8CCC2
GO:0032613	interleukin-10 production	biological_process	1	83	1	151	0	0	1.819277108	Q8CCC2
GO:0032615	interleukin-12 production	biological_process	1	83	1	151	0	0	1.819277108	Q8CCC2
GO:0032620	interleukin-17 production	biological_process	1	83	1	151	0	0	1.819277108	Q8CCC2
GO:0032640	tumor necrosis factor production	biological_process	2	83	2	151	0	0	1.819277108	Q8CCC2; P19157
GO:0032645	regulation of granulocyte macrophage colony-stimulating factor production	biological_process	1	83	1	151	0	0	1.819277108	Q8CCC2
GO:0032649	regulation of interferon-gamma production	biological_process	1	83	1	151	0	0	1.819277108	Q8CCC2
GO:0032653	regulation of interleukin-10 production	biological_process	1	83	1	151	0	0	1.819277108	Q8CCC2
GO:0032655	regulation of interleukin-12 production	biological_process	1	83	1	151	0	0	1.819277108	Q8CCC2
GO:0032660	regulation of interleukin-17 production	biological_process	1	83	1	151	0	0	1.819277108	Q8CCC2
GO:0032680	regulation of tumor necrosis factor production	biological_process	2	83	2	151	0	0	1.819277108	Q8CCC2; P19157
GO:0032693	negative regulation of interleukin-10 production	biological_process	1	83	1	151	0	0	1.819277108	Q8CCC2
GO:0032700	negative regulation of interleukin-17 production	biological_process	1	83	1	151	0	0	1.819277108	Q8CCC2
GO:0032725	positive regulation of granulocyte macrophage colony-stimulating factor production	biological_process	1	83	1	151	0	0	1.819277108	Q8CCC2
GO:0032729	positive regulation of interferon-gamma production	biological_process	1	83	1	151	0	0	1.819277108	Q8CCC2
GO:0032733	positive regulation of interleukin-10 production	biological_process	1	83	1	151	0	0	1.819277108	Q8CCC2
GO:0032735	positive regulation of interleukin-12 production	biological_process	1	83	1	151	0	0	1.819277108	Q8CCC2
GO:0032740	positive regulation of interleukin-17 production	biological_process	1	83	1	151	0	0	1.819277108	Q8CCC2
GO:0032760	positive regulation of tumor necrosis factor production	biological_process	1	83	1	151	0	0	1.819277108	Q8CCC2
GO:0032814	regulation of natural killer cell activation	biological_process	1	83	1	151	0	0	1.819277108	Q8CCC2
GO:0032816	positive regulation of natural killer cell activation	biological_process	1	83	1	151	0	0	1.819277108	Q8CCC2
GO:0032817	regulation of natural killer cell proliferation	biological_process	1	83	1	151	0	0	1.819277108	Q8CCC2
GO:0032819	positive regulation of natural killer cell proliferation	biological_process	1	83	1	151	0	0	1.819277108	Q8CCC2
GO:0032946	positive regulation of mononuclear cell proliferation	biological_process	1	83	1	151	0	0	1.819277108	Q8CCC2
GO:0033002	muscle cell proliferation	biological_process	1	83	1	151	0	0	1.819277108	Q8CCC2
GO:0034341	response to interferon-gamma	biological_process	1	83	1	151	0	0	1.819277108	Q8CCC2
GO:0034390	smooth muscle cell apoptotic process	biological_process	1	83	1	151	0	0	1.819277108	Q8CCC2
GO:0034391	regulation of smooth muscle cell apoptotic process	biological_process	1	83	1	151	0	0	1.819277108	Q8CCC2
GO:0034393	positive regulation of smooth muscle cell apoptotic process	biological_process	1	83	1	151	0	0	1.819277108	Q8CCC2
GO:0035743	CD4-positive, alpha-beta T cell cytokine production	biological_process	1	83	1	151	0	0	1.819277108	Q8CCC2
GO:0035744	T-helper 1 cell cytokine production	biological_process	1	83	1	151	0	0	1.819277108	Q8CCC2
GO:0042088	T-helper 1 type immune response	biological_process	1	83	1	151	0	0	1.819277108	Q8CCC2
GO:0042095	interferon-gamma biosynthetic process	biological_process	1	83	1	151	0	0	1.819277108	Q8CCC2
GO:0042102	positive regulation of T cell proliferation	biological_process	1	83	1	151	0	0	1.819277108	Q8CCC2
GO:0042104	positive regulation of activated T cell proliferation	biological_process	1	83	1	151	0	0	1.819277108	Q8CCC2
GO:0042164	interleukin-12 alpha subunit binding	molecular_function	1	83	1	151	0	0	1.819277108	Q8CCC2
GO:0042267	natural killer cell mediated cytotoxicity	biological_process	1	83	1	151	0	0	1.819277108	Q8CCC2
GO:0042269	regulation of natural killer cell mediated cytotoxicity	biological_process	1	83	1	151	0	0	1.819277108	Q8CCC2
GO:0042503	tyrosine phosphorylation of Stat3 protein	biological_process	2	83	2	151	0	0	1.819277108	Q8CCC2; F8WH42
GO:0042504	tyrosine phosphorylation of Stat4 protein	biological_process	1	83	1	151	0	0	1.819277108	Q8CCC2
GO:0042506	tyrosine phosphorylation of Stat5 protein	biological_process	1	83	1	151	0	0	1.819277108	Q8CCC2
GO:0042508	tyrosine phosphorylation of Stat1 protein	biological_process	2	83	2	151	0	0	1.819277108	Q8CCC2; F8WH42
GO:0042509	regulation of tyrosine phosphorylation of STAT protein	biological_process	2	83	2	151	0	0	1.819277108	Q8CCC2; F8WH42
GO:0042510	regulation of tyrosine phosphorylation of Stat1 protein	biological_process	2	83	2	151	0	0	1.819277108	Q8CCC2; F8WH42
GO:0042516	regulation of tyrosine phosphorylation of Stat3 protein	biological_process	2	83	2	151	0	0	1.819277108	Q8CCC2; F8WH42
GO:0042517	positive regulation of tyrosine phosphorylation of Stat3 protein	biological_process	2	83	2	151	0	0	1.819277108	Q8CCC2; F8WH42
GO:0042519	regulation of tyrosine phosphorylation of Stat4 protein	biological_process	1	83	1	151	0	0	1.819277108	Q8CCC2
GO:0042520	positive regulation of tyrosine phosphorylation of Stat4 protein	biological_process	1	83	1	151	0	0	1.819277108	Q8CCC2
GO:0042522	regulation of tyrosine phosphorylation of Stat5 protein	biological_process	1	83	1	151	0	0	1.819277108	Q8CCC2
GO:0042523	positive regulation of tyrosine phosphorylation of Stat5 protein	biological_process	1	83	1	151	0	0	1.819277108	Q8CCC2
GO:0042531	positive regulation of tyrosine phosphorylation of STAT protein	biological_process	2	83	2	151	0	0	1.819277108	Q8CCC2; F8WH42
GO:0042832	defense response to protozoan	biological_process	1	83	1	151	0	0	1.819277108	Q8CCC2
GO:0042976	activation of Janus kinase activity	biological_process	1	83	1	151	0	0	1.819277108	Q8CCC2
GO:0042977	activation of JAK2 kinase activity	biological_process	1	83	1	151	0	0	1.819277108	Q8CCC2
GO:0043514	interleukin-12 complex	cellular_component	1	83	1	151	0	0	1.819277108	Q8CCC2
GO:0044110	growth involved in symbiotic interaction	biological_process	2	83	2	151	0	0	1.819277108	Q8CCC2; P50446
GO:0044116	growth of symbiont involved in interaction with host	biological_process	2	83	2	151	0	0	1.819277108	Q8CCC2; P50446
GO:0044117	growth of symbiont in host	biological_process	1	83	1	151	0	0	1.819277108	Q8CCC2
GO:0044126	regulation of growth of symbiont in host	biological_process	1	83	1	151	0	0	1.819277108	Q8CCC2
GO:0044130	negative regulation of growth of symbiont in host	biological_process	1	83	1	151	0	0	1.819277108	Q8CCC2
GO:0044144	modulation of growth of symbiont involved in interaction with host	biological_process	2	83	2	151	0	0	1.819277108	Q8CCC2; P50446
GO:0044146	negative regulation of growth of symbiont involved in interaction with host	biological_process	2	83	2	151	0	0	1.819277108	Q8CCC2; P50446
GO:0045072	regulation of interferon-gamma biosynthetic process	biological_process	1	83	1	151	0	0	1.819277108	Q8CCC2
GO:0045078	positive regulation of interferon-gamma biosynthetic process	biological_process	1	83	1	151	0	0	1.819277108	Q8CCC2
GO:0045519	interleukin-23 receptor binding	molecular_function	1	83	1	151	0	0	1.819277108	Q8CCC2
GO:0045639	positive regulation of myeloid cell differentiation	biological_process	2	83	2	151	0	0	1.819277108	Q8CCC2; F8WH42
GO:0045670	regulation of osteoclast differentiation	biological_process	1	83	1	151	0	0	1.819277108	Q8CCC2
GO:0045672	positive regulation of osteoclast differentiation	biological_process	1	83	1	151	0	0	1.819277108	Q8CCC2
GO:0045954	positive regulation of natural killer cell mediated cytotoxicity	biological_process	1	83	1	151	0	0	1.819277108	Q8CCC2
GO:0046425	regulation of JAK-STAT cascade	biological_process	2	83	2	151	0	0	1.819277108	Q8CCC2; F8WH42
GO:0046427	positive regulation of JAK-STAT cascade	biological_process	2	83	2	151	0	0	1.819277108	Q8CCC2; F8WH42
GO:0046633	alpha-beta T cell proliferation	biological_process	1	83	1	151	0	0	1.819277108	Q8CCC2
GO:0046634	regulation of alpha-beta T cell activation	biological_process	1	83	1	151	0	0	1.819277108	Q8CCC2
GO:0046635	positive regulation of alpha-beta T cell activation	biological_process	1	83	1	151	0	0	1.819277108	Q8CCC2
GO:0046640	regulation of alpha-beta T cell proliferation	biological_process	1	83	1	151	0	0	1.819277108	Q8CCC2
GO:0046641	positive regulation of alpha-beta T cell proliferation	biological_process	1	83	1	151	0	0	1.819277108	Q8CCC2
GO:0048659	smooth muscle cell proliferation	biological_process	1	83	1	151	0	0	1.819277108	Q8CCC2
GO:0048660	regulation of smooth muscle cell proliferation	biological_process	1	83	1	151	0	0	1.819277108	Q8CCC2
GO:0048662	negative regulation of smooth muscle cell proliferation	biological_process	1	83	1	151	0	0	1.819277108	Q8CCC2
GO:0050671	positive regulation of lymphocyte proliferation	biological_process	1	83	1	151	0	0	1.819277108	Q8CCC2
GO:0050688	regulation of defense response to virus	biological_process	1	83	1	151	0	0	1.819277108	Q8CCC2
GO:0050691	regulation of defense response to virus by host	biological_process	1	83	1	151	0	0	1.819277108	Q8CCC2
GO:0050730	regulation of peptidyl-tyrosine phosphorylation	biological_process	3	83	3	151	0	0	1.819277108	Q8CCC2; Q8BSU1; F8WH42
GO:0050731	positive regulation of peptidyl-tyrosine phosphorylation	biological_process	3	83	3	151	0	0	1.819277108	Q8CCC2; Q8BSU1; F8WH42
GO:0051132	NK T cell activation	biological_process	1	83	1	151	0	0	1.819277108	Q8CCC2
GO:0051133	regulation of NK T cell activation	biological_process	1	83	1	151	0	0	1.819277108	Q8CCC2
GO:0051135	positive regulation of NK T cell activation	biological_process	1	83	1	151	0	0	1.819277108	Q8CCC2
GO:0051140	regulation of NK T cell proliferation	biological_process	1	83	1	151	0	0	1.819277108	Q8CCC2
GO:0051142	positive regulation of NK T cell proliferation	biological_process	1	83	1	151	0	0	1.819277108	Q8CCC2
GO:0051607	defense response to virus	biological_process	1	83	1	151	0	0	1.819277108	Q8CCC2
GO:0070665	positive regulation of leukocyte proliferation	biological_process	1	83	1	151	0	0	1.819277108	Q8CCC2
GO:0070743	interleukin-23 complex	cellular_component	1	83	1	151	0	0	1.819277108	Q8CCC2
GO:0071216	cellular response to biotic stimulus	biological_process	2	83	2	151	0	0	1.819277108	Q8CCC2; P19157
GO:0071219	cellular response to molecule of bacterial origin	biological_process	2	83	2	151	0	0	1.819277108	Q8CCC2; P19157
GO:0071222	cellular response to lipopolysaccharide	biological_process	2	83	2	151	0	0	1.819277108	Q8CCC2; P19157
GO:0071346	cellular response to interferon-gamma	biological_process	1	83	1	151	0	0	1.819277108	Q8CCC2
GO:0071706	tumor necrosis factor superfamily cytokine production	biological_process	2	83	2	151	0	0	1.819277108	Q8CCC2; P19157
GO:0097696	STAT cascade	biological_process	2	83	2	151	0	0	1.819277108	Q8CCC2; F8WH42
GO:1903555	regulation of tumor necrosis factor superfamily cytokine production	biological_process	2	83	2	151	0	0	1.819277108	Q8CCC2; P19157
GO:1903557	positive regulation of tumor necrosis factor superfamily cytokine production	biological_process	1	83	1	151	0	0	1.819277108	Q8CCC2
GO:1904892	regulation of STAT cascade	biological_process	2	83	2	151	0	0	1.819277108	Q8CCC2; F8WH42
GO:1904894	positive regulation of STAT cascade	biological_process	2	83	2	151	0	0	1.819277108	Q8CCC2; F8WH42
GO:0004092	carnitine O-acetyltransferase activity	molecular_function	1	83	1	151	0	0	1.819277108	Q8BQN4
GO:0006577	amino-acid betaine metabolic process	biological_process	1	83	1	151	0	0	1.819277108	Q8BQN4
GO:0008374	O-acyltransferase activity	molecular_function	1	83	1	151	0	0	1.819277108	Q8BQN4
GO:0009437	carnitine metabolic process	biological_process	1	83	1	151	0	0	1.819277108	Q8BQN4
GO:0016406	carnitine O-acyltransferase activity	molecular_function	1	83	1	151	0	0	1.819277108	Q8BQN4
GO:0016413	O-acetyltransferase activity	molecular_function	1	83	1	151	0	0	1.819277108	Q8BQN4
GO:0019254	carnitine metabolic process, CoA-linked	biological_process	1	83	1	151	0	0	1.819277108	Q8BQN4
GO:0001947	heart looping	biological_process	1	83	1	151	0	0	1.819277108	G5E8N3
GO:0003143	embryonic heart tube morphogenesis	biological_process	1	83	1	151	0	0	1.819277108	G5E8N3
GO:0006479	protein methylation	biological_process	1	83	1	151	0	0	1.819277108	G5E8N3
GO:0007368	determination of left/right symmetry	biological_process	1	83	1	151	0	0	1.819277108	G5E8N3
GO:0008170	N-methyltransferase activity	molecular_function	1	83	1	151	0	0	1.819277108	G5E8N3
GO:0008213	protein alkylation	biological_process	1	83	1	151	0	0	1.819277108	G5E8N3
GO:0008276	protein methyltransferase activity	molecular_function	1	83	1	151	0	0	1.819277108	G5E8N3
GO:0009799	specification of symmetry	biological_process	1	83	1	151	0	0	1.819277108	G5E8N3
GO:0009855	determination of bilateral symmetry	biological_process	1	83	1	151	0	0	1.819277108	G5E8N3
GO:0016278	lysine N-methyltransferase activity	molecular_function	1	83	1	151	0	0	1.819277108	G5E8N3
GO:0016279	protein-lysine N-methyltransferase activity	molecular_function	1	83	1	151	0	0	1.819277108	G5E8N3
GO:0016571	histone methylation	biological_process	1	83	1	151	0	0	1.819277108	G5E8N3
GO:0018022	peptidyl-lysine methylation	biological_process	1	83	1	151	0	0	1.819277108	G5E8N3
GO:0018024	histone-lysine N-methyltransferase activity	molecular_function	1	83	1	151	0	0	1.819277108	G5E8N3
GO:0034968	histone lysine methylation	biological_process	1	83	1	151	0	0	1.819277108	G5E8N3
GO:0035050	embryonic heart tube development	biological_process	1	83	1	151	0	0	1.819277108	G5E8N3
GO:0042054	histone methyltransferase activity	molecular_function	1	83	1	151	0	0	1.819277108	G5E8N3
GO:0046974	histone methyltransferase activity (H3-K9 specific)	molecular_function	1	83	1	151	0	0	1.819277108	G5E8N3
GO:0048562	embryonic organ morphogenesis	biological_process	1	83	1	151	0	0	1.819277108	G5E8N3
GO:0051567	histone H3-K9 methylation	biological_process	1	83	1	151	0	0	1.819277108	G5E8N3
GO:0060972	left/right pattern formation	biological_process	1	83	1	151	0	0	1.819277108	G5E8N3
GO:0061371	determination of heart left/right asymmetry	biological_process	1	83	1	151	0	0	1.819277108	G5E8N3
GO:0061647	histone H3-K9 modification	biological_process	1	83	1	151	0	0	1.819277108	G5E8N3
GO:0070986	left/right axis specification	biological_process	1	83	1	151	0	0	1.819277108	G5E8N3
GO:0097110	scaffold protein binding	molecular_function	1	83	1	151	0	0	1.819277108	Q922U2
GO:0003924	GTPase activity	molecular_function	2	83	2	151	0	0	1.819277108	A2APZ1; Q3UED7
GO:0012506	vesicle membrane	cellular_component	1	83	1	151	0	0	1.819277108	A2APZ1
GO:0019882	antigen processing and presentation	biological_process	1	83	1	151	0	0	1.819277108	A2APZ1
GO:0030139	endocytic vesicle	cellular_component	2	83	2	151	0	0	1.819277108	A2APZ1; A2ARV4
GO:0030659	cytoplasmic vesicle membrane	cellular_component	1	83	1	151	0	0	1.819277108	A2APZ1
GO:0030666	endocytic vesicle membrane	cellular_component	1	83	1	151	0	0	1.819277108	A2APZ1
GO:0030670	phagocytic vesicle membrane	cellular_component	1	83	1	151	0	0	1.819277108	A2APZ1
GO:0030742	GTP-dependent protein binding	molecular_function	1	83	1	151	0	0	1.819277108	A2APZ1
GO:0032438	melanosome organization	biological_process	1	83	1	151	0	0	1.819277108	A2APZ1
GO:0032482	Rab protein signal transduction	biological_process	1	83	1	151	0	0	1.819277108	A2APZ1
GO:0033059	cellular pigmentation	biological_process	1	83	1	151	0	0	1.819277108	A2APZ1
GO:0033162	melanosome membrane	cellular_component	1	83	1	151	0	0	1.819277108	A2APZ1
GO:0035646	endosome to melanosome transport	biological_process	1	83	1	151	0	0	1.819277108	A2APZ1
GO:0035650	AP-1 adaptor complex binding	molecular_function	1	83	1	151	0	0	1.819277108	A2APZ1
GO:0035651	AP-3 adaptor complex binding	molecular_function	1	83	1	151	0	0	1.819277108	A2APZ1
GO:0036461	BLOC-2 complex binding	molecular_function	1	83	1	151	0	0	1.819277108	A2APZ1
GO:0042470	melanosome	cellular_component	2	83	2	151	0	0	1.819277108	A2APZ1; O35887
GO:0043476	pigment accumulation	biological_process	1	83	1	151	0	0	1.819277108	A2APZ1
GO:0043482	cellular pigment accumulation	biological_process	1	83	1	151	0	0	1.819277108	A2APZ1
GO:0043485	endosome to pigment granule transport	biological_process	1	83	1	151	0	0	1.819277108	A2APZ1
GO:0044232	organelle membrane contact site	cellular_component	1	83	1	151	0	0	1.819277108	A2APZ1
GO:0044233	ER-mitochondrion membrane contact site	cellular_component	1	83	1	151	0	0	1.819277108	A2APZ1
GO:0045009	chitosome	cellular_component	1	83	1	151	0	0	1.819277108	A2APZ1
GO:0045335	phagocytic vesicle	cellular_component	1	83	1	151	0	0	1.819277108	A2APZ1
GO:0048066	developmental pigmentation	biological_process	1	83	1	151	0	0	1.819277108	A2APZ1
GO:0048753	pigment granule organization	biological_process	1	83	1	151	0	0	1.819277108	A2APZ1
GO:0048757	pigment granule maturation	biological_process	1	83	1	151	0	0	1.819277108	A2APZ1
GO:0048770	pigment granule	cellular_component	2	83	2	151	0	0	1.819277108	A2APZ1; O35887
GO:0050931	pigment cell differentiation	biological_process	1	83	1	151	0	0	1.819277108	A2APZ1
GO:0090382	phagosome maturation	biological_process	1	83	1	151	0	0	1.819277108	A2APZ1
GO:1903232	melanosome assembly	biological_process	1	83	1	151	0	0	1.819277108	A2APZ1
GO:0005779	integral component of peroxisomal membrane	cellular_component	1	83	1	151	0	0	1.819277108	Q9Z211
GO:0016557	peroxisome membrane biogenesis	biological_process	1	83	1	151	0	0	1.819277108	Q9Z211
GO:0031231	intrinsic component of peroxisomal membrane	cellular_component	1	83	1	151	0	0	1.819277108	Q9Z211
GO:0044091	membrane biogenesis	biological_process	1	83	1	151	0	0	1.819277108	Q9Z211
GO:0044375	regulation of peroxisome size	biological_process	1	83	1	151	0	0	1.819277108	Q9Z211
GO:0050873	brown fat cell differentiation	biological_process	1	83	1	151	0	0	1.819277108	Q9Z211
GO:0003873	6-phosphofructo-2-kinase activity	molecular_function	1	83	1	151	0	0	1.819277108	Q9ESY2
GO:0004331	fructose-2,6-bisphosphate 2-phosphatase activity	molecular_function	1	83	1	151	0	0	1.819277108	Q9ESY2
GO:0006000	fructose metabolic process	biological_process	1	83	1	151	0	0	1.819277108	Q9ESY2
GO:0006003	fructose 2,6-bisphosphate metabolic process	biological_process	1	83	1	151	0	0	1.819277108	Q9ESY2
GO:0008443	phosphofructokinase activity	molecular_function	1	83	1	151	0	0	1.819277108	Q9ESY2
GO:0019200	carbohydrate kinase activity	molecular_function	1	83	1	151	0	0	1.819277108	Q9ESY2
GO:0019203	carbohydrate phosphatase activity	molecular_function	1	83	1	151	0	0	1.819277108	Q9ESY2
GO:0046835	carbohydrate phosphorylation	biological_process	1	83	1	151	0	0	1.819277108	Q9ESY2
GO:0050308	sugar-phosphatase activity	molecular_function	1	83	1	151	0	0	1.819277108	Q9ESY2
GO:0035634	response to stilbenoid	biological_process	1	83	1	151	0	0	1.819277108	Q91VB8
GO:0080184	response to phenylpropanoid	biological_process	1	83	1	151	0	0	1.819277108	Q91VB8
GO:0004559	alpha-mannosidase activity	molecular_function	1	83	1	151	0	0	1.819277108	A2AJ14
GO:0004571	mannosyl-oligosaccharide 1,2-alpha-mannosidase activity	molecular_function	1	83	1	151	0	0	1.819277108	A2AJ14
GO:0006491	N-glycan processing	biological_process	1	83	1	151	0	0	1.819277108	A2AJ14
GO:0006517	protein deglycosylation	biological_process	1	83	1	151	0	0	1.819277108	A2AJ14
GO:0015924	mannosyl-oligosaccharide mannosidase activity	molecular_function	1	83	1	151	0	0	1.819277108	A2AJ14
GO:0030433	ubiquitin-dependent ERAD pathway	biological_process	1	83	1	151	0	0	1.819277108	A2AJ14
GO:0035977	protein deglycosylation involved in glycoprotein catabolic process	biological_process	1	83	1	151	0	0	1.819277108	A2AJ14
GO:0036503	ERAD pathway	biological_process	1	83	1	151	0	0	1.819277108	A2AJ14
GO:0036507	protein demannosylation	biological_process	1	83	1	151	0	0	1.819277108	A2AJ14
GO:0036508	protein alpha-1,2-demannosylation	biological_process	1	83	1	151	0	0	1.819277108	A2AJ14
GO:0036509	trimming of terminal mannose on B branch	biological_process	1	83	1	151	0	0	1.819277108	A2AJ14
GO:0044322	endoplasmic reticulum quality control compartment	cellular_component	1	83	1	151	0	0	1.819277108	A2AJ14
GO:0097466	glycoprotein ERAD pathway	biological_process	1	83	1	151	0	0	1.819277108	A2AJ14
GO:1904380	endoplasmic reticulum mannose trimming	biological_process	1	83	1	151	0	0	1.819277108	A2AJ14
GO:1904382	mannose trimming involved in glycoprotein ERAD pathway	biological_process	1	83	1	151	0	0	1.819277108	A2AJ14
GO:1904587	response to glycoprotein	biological_process	1	83	1	151	0	0	1.819277108	A2AJ14
GO:0044133	growth of symbiont on or near host	biological_process	1	83	1	151	0	0	1.819277108	P50446
GO:0044139	modulation of growth of symbiont on or near host	biological_process	1	83	1	151	0	0	1.819277108	P50446
GO:0044140	negative regulation of growth of symbiont on or near host surface	biological_process	1	83	1	151	0	0	1.819277108	P50446
GO:0050830	defense response to Gram-positive bacterium	biological_process	1	83	1	151	0	0	1.819277108	P50446
GO:0000209	protein polyubiquitination	biological_process	1	83	1	151	0	0	1.819277108	Q9CVL5
GO:0001779	natural killer cell differentiation	biological_process	1	83	1	151	0	0	1.819277108	Q9CVL5
GO:0003170	heart valve development	biological_process	1	83	1	151	0	0	1.819277108	Q9CVL5
GO:0003231	cardiac ventricle development	biological_process	2	83	2	151	0	0	1.819277108	Q9CVL5; A2ARV4
GO:0003281	ventricular septum development	biological_process	2	83	2	151	0	0	1.819277108	Q9CVL5; A2ARV4
GO:0042787	protein ubiquitination involved in ubiquitin-dependent protein catabolic process	biological_process	1	83	1	151	0	0	1.819277108	Q9CVL5
GO:0060706	cell differentiation involved in embryonic placenta development	biological_process	2	83	2	151	0	0	1.819277108	Q9CVL5; F8WH42
GO:0060707	trophoblast giant cell differentiation	biological_process	2	83	2	151	0	0	1.819277108	Q9CVL5; F8WH42
GO:0060708	spongiotrophoblast differentiation	biological_process	2	83	2	151	0	0	1.819277108	Q9CVL5; F8WH42
GO:0060712	spongiotrophoblast layer development	biological_process	2	83	2	151	0	0	1.819277108	Q9CVL5; F8WH42
GO:0070534	protein K63-linked ubiquitination	biological_process	1	83	1	151	0	0	1.819277108	Q9CVL5
GO:1903076	regulation of protein localization to plasma membrane	biological_process	1	83	1	151	0	0	1.819277108	Q9CVL5
GO:1903077	negative regulation of protein localization to plasma membrane	biological_process	1	83	1	151	0	0	1.819277108	Q9CVL5
GO:1903729	regulation of plasma membrane organization	biological_process	2	83	2	151	0	0	1.819277108	Q9CVL5; P31725
GO:1903828	negative regulation of cellular protein localization	biological_process	1	83	1	151	0	0	1.819277108	Q9CVL5
GO:1904375	regulation of protein localization to cell periphery	biological_process	1	83	1	151	0	0	1.819277108	Q9CVL5
GO:1904376	negative regulation of protein localization to cell periphery	biological_process	1	83	1	151	0	0	1.819277108	Q9CVL5
GO:0000185	activation of MAPKKK activity	biological_process	1	83	1	151	0	0	1.819277108	Q8BSU1
GO:0001639	PLC activating G-protein coupled glutamate receptor activity	molecular_function	1	83	1	151	0	0	1.819277108	Q8BSU1
GO:0002029	desensitization of G-protein coupled receptor protein signaling pathway	biological_process	1	83	1	151	0	0	1.819277108	Q8BSU1
GO:0006414	translational elongation	biological_process	1	83	1	151	0	0	1.819277108	Q8BSU1
GO:0006448	regulation of translational elongation	biological_process	1	83	1	151	0	0	1.819277108	Q8BSU1
GO:0007196	adenylate cyclase-inhibiting G-protein coupled glutamate receptor signaling pathway	biological_process	1	83	1	151	0	0	1.819277108	Q8BSU1
GO:0007200	phospholipase C-activating G-protein coupled receptor signaling pathway	biological_process	1	83	1	151	0	0	1.819277108	Q8BSU1
GO:0007205	protein kinase C-activating G-protein coupled receptor signaling pathway	biological_process	1	83	1	151	0	0	1.819277108	Q8BSU1
GO:0007206	phospholipase C-activating G-protein coupled glutamate receptor signaling pathway	biological_process	1	83	1	151	0	0	1.819277108	Q8BSU1
GO:0007215	glutamate receptor signaling pathway	biological_process	1	83	1	151	0	0	1.819277108	Q8BSU1
GO:0007216	G-protein coupled glutamate receptor signaling pathway	biological_process	1	83	1	151	0	0	1.819277108	Q8BSU1
GO:0007270	neuron-neuron synaptic transmission	biological_process	1	83	1	151	0	0	1.819277108	Q8BSU1
GO:0008066	glutamate receptor activity	molecular_function	1	83	1	151	0	0	1.819277108	Q8BSU1
GO:0010359	regulation of anion channel activity	biological_process	1	83	1	151	0	0	1.819277108	Q8BSU1
GO:0022401	negative adaptation of signaling pathway	biological_process	1	83	1	151	0	0	1.819277108	Q8BSU1
GO:0023058	adaptation of signaling pathway	biological_process	1	83	1	151	0	0	1.819277108	Q8BSU1
GO:0030594	neurotransmitter receptor activity	molecular_function	1	83	1	151	0	0	1.819277108	Q8BSU1
GO:0031685	adenosine receptor binding	molecular_function	1	83	1	151	0	0	1.819277108	Q8BSU1
GO:0031687	A2A adenosine receptor binding	molecular_function	1	83	1	151	0	0	1.819277108	Q8BSU1
GO:0035249	synaptic transmission, glutamatergic	biological_process	1	83	1	151	0	0	1.819277108	Q8BSU1
GO:0035584	calcium-mediated signaling using intracellular calcium source	biological_process	1	83	1	151	0	0	1.819277108	Q8BSU1
GO:0048168	regulation of neuronal synaptic plasticity	biological_process	1	83	1	151	0	0	1.819277108	Q8BSU1
GO:0048169	regulation of long-term neuronal synaptic plasticity	biological_process	1	83	1	151	0	0	1.819277108	Q8BSU1
GO:0048170	positive regulation of long-term neuronal synaptic plasticity	biological_process	1	83	1	151	0	0	1.819277108	Q8BSU1
GO:0051966	regulation of synaptic transmission, glutamatergic	biological_process	1	83	1	151	0	0	1.819277108	Q8BSU1
GO:0060078	regulation of postsynaptic membrane potential	biological_process	1	83	1	151	0	0	1.819277108	Q8BSU1
GO:0061097	regulation of protein tyrosine kinase activity	biological_process	1	83	1	151	0	0	1.819277108	Q8BSU1
GO:0061098	positive regulation of protein tyrosine kinase activity	biological_process	1	83	1	151	0	0	1.819277108	Q8BSU1
GO:0090647	modulation of age-related behavioral decline	biological_process	1	83	1	151	0	0	1.819277108	Q8BSU1
GO:0097386	glial cell projection	cellular_component	1	83	1	151	0	0	1.819277108	Q8BSU1
GO:0097449	astrocyte projection	cellular_component	1	83	1	151	0	0	1.819277108	Q8BSU1
GO:0098839	postsynaptic density membrane	cellular_component	1	83	1	151	0	0	1.819277108	Q8BSU1
GO:0098960	postsynaptic neurotransmitter receptor activity	NA	1	83	1	151	0	0	1.819277108	Q8BSU1
GO:0098988	G-protein coupled glutamate receptor activity	NA	1	83	1	151	0	0	1.819277108	Q8BSU1
GO:0099530	G-protein coupled receptor activity involved in regulation of postsynaptic membrane potential	molecular_function	1	83	1	151	0	0	1.819277108	Q8BSU1
GO:0099541	trans-synaptic signaling by lipid	biological_process	1	83	1	151	0	0	1.819277108	Q8BSU1
GO:0099542	trans-synaptic signaling by endocannabinoid	biological_process	1	83	1	151	0	0	1.819277108	Q8BSU1
GO:0099550	trans-synaptic signalling, modulating synaptic transmission	biological_process	1	83	1	151	0	0	1.819277108	Q8BSU1
GO:0099552	trans-synaptic signaling by lipid, modulating synaptic transmission	biological_process	1	83	1	151	0	0	1.819277108	Q8BSU1
GO:0099553	trans-synaptic signaling by endocannabinoid, modulating synaptic transmission	biological_process	1	83	1	151	0	0	1.819277108	Q8BSU1
GO:0099565	chemical synaptic transmission, postsynaptic	biological_process	1	83	1	151	0	0	1.819277108	Q8BSU1
GO:0099566	regulation of postsynaptic cytosolic calcium ion concentration	biological_process	1	83	1	151	0	0	1.819277108	Q8BSU1
GO:0099583	neurotransmitter receptor activity involved in regulation of postsynaptic cytosolic calcium ion concentration	molecular_function	1	83	1	151	0	0	1.819277108	Q8BSU1
GO:0099634	postsynaptic specialization membrane	cellular_component	1	83	1	151	0	0	1.819277108	Q8BSU1
GO:1902938	regulation of intracellular calcium activated chloride channel activity	biological_process	1	83	1	151	0	0	1.819277108	Q8BSU1
GO:1903795	regulation of inorganic anion transmembrane transport	biological_process	1	83	1	151	0	0	1.819277108	Q8BSU1
GO:1904645	response to beta-amyloid	biological_process	1	83	1	151	0	0	1.819277108	Q8BSU1
GO:1904646	cellular response to beta-amyloid	biological_process	1	83	1	151	0	0	1.819277108	Q8BSU1
GO:2001225	regulation of chloride transport	biological_process	1	83	1	151	0	0	1.819277108	Q8BSU1
GO:0035456	response to interferon-beta	biological_process	1	83	1	151	0	0	1.819277108	Q3UED7
GO:0035458	cellular response to interferon-beta	biological_process	1	83	1	151	0	0	1.819277108	Q3UED7
GO:0001076	transcription factor activity, RNA polymerase II transcription factor binding	molecular_function	1	83	1	151	0	0	1.819277108	F8WH42
GO:0001134	transcription factor activity, transcription factor recruiting	molecular_function	1	83	1	151	0	0	1.819277108	F8WH42
GO:0001135	transcription factor activity, RNA polymerase II transcription factor recruiting	molecular_function	1	83	1	151	0	0	1.819277108	F8WH42
GO:0003337	mesenchymal to epithelial transition involved in metanephros morphogenesis	biological_process	1	83	1	151	0	0	1.819277108	F8WH42
GO:0003339	regulation of mesenchymal to epithelial transition involved in metanephros morphogenesis	biological_process	1	83	1	151	0	0	1.819277108	F8WH42
GO:0005146	leukemia inhibitory factor receptor binding	molecular_function	1	83	1	151	0	0	1.819277108	F8WH42
GO:0007126	meiotic nuclear division	biological_process	1	83	1	151	0	0	1.819277108	F8WH42
GO:0014013	regulation of gliogenesis	biological_process	2	83	2	151	0	0	1.819277108	F8WH42; A2ARV4
GO:0014015	positive regulation of gliogenesis	biological_process	2	83	2	151	0	0	1.819277108	F8WH42; A2ARV4
GO:0018105	peptidyl-serine phosphorylation	biological_process	1	83	1	151	0	0	1.819277108	F8WH42
GO:0018209	peptidyl-serine modification	biological_process	1	83	1	151	0	0	1.819277108	F8WH42
GO:0019827	stem cell population maintenance	biological_process	1	83	1	151	0	0	1.819277108	F8WH42
GO:0030225	macrophage differentiation	biological_process	1	83	1	151	0	0	1.819277108	F8WH42
GO:0030856	regulation of epithelial cell differentiation	biological_process	1	83	1	151	0	0	1.819277108	F8WH42
GO:0030858	positive regulation of epithelial cell differentiation	biological_process	1	83	1	151	0	0	1.819277108	F8WH42
GO:0033135	regulation of peptidyl-serine phosphorylation	biological_process	1	83	1	151	0	0	1.819277108	F8WH42
GO:0033138	positive regulation of peptidyl-serine phosphorylation	biological_process	1	83	1	151	0	0	1.819277108	F8WH42
GO:0033139	regulation of peptidyl-serine phosphorylation of STAT protein	biological_process	1	83	1	151	0	0	1.819277108	F8WH42
GO:0033141	positive regulation of peptidyl-serine phosphorylation of STAT protein	biological_process	1	83	1	151	0	0	1.819277108	F8WH42
GO:0040020	regulation of meiotic nuclear division	biological_process	1	83	1	151	0	0	1.819277108	F8WH42
GO:0042501	serine phosphorylation of STAT protein	biological_process	1	83	1	151	0	0	1.819277108	F8WH42
GO:0042511	positive regulation of tyrosine phosphorylation of Stat1 protein	biological_process	1	83	1	151	0	0	1.819277108	F8WH42
GO:0043409	negative regulation of MAPK cascade	biological_process	2	83	2	151	0	0	1.819277108	F8WH42; P19157
GO:0043974	histone H3-K27 acetylation	biological_process	1	83	1	151	0	0	1.819277108	F8WH42
GO:0044060	regulation of endocrine process	biological_process	1	83	1	151	0	0	1.819277108	F8WH42
GO:0045649	regulation of macrophage differentiation	biological_process	1	83	1	151	0	0	1.819277108	F8WH42
GO:0045651	positive regulation of macrophage differentiation	biological_process	1	83	1	151	0	0	1.819277108	F8WH42
GO:0045685	regulation of glial cell differentiation	biological_process	1	83	1	151	0	0	1.819277108	F8WH42
GO:0045687	positive regulation of glial cell differentiation	biological_process	1	83	1	151	0	0	1.819277108	F8WH42
GO:0045835	negative regulation of meiotic nuclear division	biological_process	1	83	1	151	0	0	1.819277108	F8WH42
GO:0046887	positive regulation of hormone secretion	biological_process	1	83	1	151	0	0	1.819277108	F8WH42
GO:0048710	regulation of astrocyte differentiation	biological_process	1	83	1	151	0	0	1.819277108	F8WH42
GO:0048711	positive regulation of astrocyte differentiation	biological_process	1	83	1	151	0	0	1.819277108	F8WH42
GO:0048861	leukemia inhibitory factor signaling pathway	biological_process	1	83	1	151	0	0	1.819277108	F8WH42
GO:0050886	endocrine process	biological_process	1	83	1	151	0	0	1.819277108	F8WH42
GO:0051321	meiotic cell cycle	biological_process	1	83	1	151	0	0	1.819277108	F8WH42
GO:0051445	regulation of meiotic cell cycle	biological_process	1	83	1	151	0	0	1.819277108	F8WH42
GO:0051447	negative regulation of meiotic cell cycle	biological_process	1	83	1	151	0	0	1.819277108	F8WH42
GO:0051458	corticotropin secretion	biological_process	1	83	1	151	0	0	1.819277108	F8WH42
GO:0051459	regulation of corticotropin secretion	biological_process	1	83	1	151	0	0	1.819277108	F8WH42
GO:0051461	positive regulation of corticotropin secretion	biological_process	1	83	1	151	0	0	1.819277108	F8WH42
GO:0060231	mesenchymal to epithelial transition	biological_process	1	83	1	151	0	0	1.819277108	F8WH42
GO:0060290	transdifferentiation	biological_process	1	83	1	151	0	0	1.819277108	F8WH42
GO:0060426	lung vasculature development	biological_process	1	83	1	151	0	0	1.819277108	F8WH42
GO:0060462	lung lobe development	biological_process	1	83	1	151	0	0	1.819277108	F8WH42
GO:0060463	lung lobe morphogenesis	biological_process	1	83	1	151	0	0	1.819277108	F8WH42
GO:0060986	endocrine hormone secretion	biological_process	1	83	1	151	0	0	1.819277108	F8WH42
GO:0070371	ERK1 and ERK2 cascade	biological_process	2	83	2	151	0	0	1.819277108	F8WH42; P19157
GO:0070372	regulation of ERK1 and ERK2 cascade	biological_process	2	83	2	151	0	0	1.819277108	F8WH42; P19157
GO:0070373	negative regulation of ERK1 and ERK2 cascade	biological_process	2	83	2	151	0	0	1.819277108	F8WH42; P19157
GO:0072028	nephron morphogenesis	biological_process	1	83	1	151	0	0	1.819277108	F8WH42
GO:0072077	renal vesicle morphogenesis	biological_process	1	83	1	151	0	0	1.819277108	F8WH42
GO:0072087	renal vesicle development	biological_process	1	83	1	151	0	0	1.819277108	F8WH42
GO:0072088	nephron epithelium morphogenesis	biological_process	1	83	1	151	0	0	1.819277108	F8WH42
GO:0072108	positive regulation of mesenchymal to epithelial transition involved in metanephros morphogenesis	biological_process	1	83	1	151	0	0	1.819277108	F8WH42
GO:0072160	nephron tubule epithelial cell differentiation	biological_process	1	83	1	151	0	0	1.819277108	F8WH42
GO:0072182	regulation of nephron tubule epithelial cell differentiation	biological_process	1	83	1	151	0	0	1.819277108	F8WH42
GO:0072215	regulation of metanephros development	biological_process	1	83	1	151	0	0	1.819277108	F8WH42
GO:0072216	positive regulation of metanephros development	biological_process	1	83	1	151	0	0	1.819277108	F8WH42
GO:0072257	metanephric nephron tubule epithelial cell differentiation	biological_process	1	83	1	151	0	0	1.819277108	F8WH42
GO:0072273	metanephric nephron morphogenesis	biological_process	1	83	1	151	0	0	1.819277108	F8WH42
GO:0072283	metanephric renal vesicle morphogenesis	biological_process	1	83	1	151	0	0	1.819277108	F8WH42
GO:0072307	regulation of metanephric nephron tubule epithelial cell differentiation	biological_process	1	83	1	151	0	0	1.819277108	F8WH42
GO:0090183	regulation of kidney development	biological_process	1	83	1	151	0	0	1.819277108	F8WH42
GO:0090184	positive regulation of kidney development	biological_process	1	83	1	151	0	0	1.819277108	F8WH42
GO:0090277	positive regulation of peptide hormone secretion	biological_process	1	83	1	151	0	0	1.819277108	F8WH42
GO:0098727	maintenance of cell number	biological_process	1	83	1	151	0	0	1.819277108	F8WH42
GO:1901674	regulation of histone H3-K27 acetylation	biological_process	1	83	1	151	0	0	1.819277108	F8WH42
GO:1901676	positive regulation of histone H3-K27 acetylation	biological_process	1	83	1	151	0	0	1.819277108	F8WH42
GO:1903025	regulation of RNA polymerase II regulatory region sequence-specific DNA binding	biological_process	1	83	1	151	0	0	1.819277108	F8WH42
GO:1903046	meiotic cell cycle process	biological_process	1	83	1	151	0	0	1.819277108	F8WH42
GO:2000241	regulation of reproductive process	biological_process	1	83	1	151	0	0	1.819277108	F8WH42
GO:2000242	negative regulation of reproductive process	biological_process	1	83	1	151	0	0	1.819277108	F8WH42
GO:2000677	regulation of transcription regulatory region DNA binding	biological_process	1	83	1	151	0	0	1.819277108	F8WH42
GO:2000696	regulation of epithelial cell differentiation involved in kidney development	biological_process	1	83	1	151	0	0	1.819277108	F8WH42
GO:0007320	insemination	biological_process	1	83	1	151	0	0	1.819277108	F2Z472
GO:0007617	mating behavior	biological_process	1	83	1	151	0	0	1.819277108	F2Z472
GO:0007618	mating	biological_process	1	83	1	151	0	0	1.819277108	F2Z472
GO:0007620	copulation	biological_process	1	83	1	151	0	0	1.819277108	F2Z472
GO:0019098	reproductive behavior	biological_process	1	83	1	151	0	0	1.819277108	F2Z472
GO:0042628	mating plug formation	biological_process	1	83	1	151	0	0	1.819277108	F2Z472
GO:0044704	single-organism reproductive behavior	biological_process	1	83	1	151	0	0	1.819277108	F2Z472
GO:0045297	post-mating behavior	biological_process	1	83	1	151	0	0	1.819277108	F2Z472
GO:0050817	coagulation	biological_process	3	83	3	151	0	0	1.819277108	F2Z472; A0A0R4J293; P31725
GO:1901317	regulation of sperm motility	biological_process	1	83	1	151	0	0	1.819277108	F2Z472
GO:1901318	negative regulation of sperm motility	biological_process	1	83	1	151	0	0	1.819277108	F2Z472
GO:0030317	flagellated sperm motility	biological_process	1	83	1	151	0	0	1.819277108	A0A0R4J0G1
GO:0004838	L-tyrosine:2-oxoglutarate aminotransferase activity	molecular_function	1	83	1	151	0	0	1.819277108	Q3UEH2
GO:0006103	2-oxoglutarate metabolic process	biological_process	1	83	1	151	0	0	1.819277108	Q3UEH2
GO:0006536	glutamate metabolic process	biological_process	1	83	1	151	0	0	1.819277108	Q3UEH2
GO:0006558	L-phenylalanine metabolic process	biological_process	1	83	1	151	0	0	1.819277108	Q3UEH2
GO:0006559	L-phenylalanine catabolic process	biological_process	1	83	1	151	0	0	1.819277108	Q3UEH2
GO:0006572	tyrosine catabolic process	biological_process	1	83	1	151	0	0	1.819277108	Q3UEH2
GO:0008483	transaminase activity	molecular_function	1	83	1	151	0	0	1.819277108	Q3UEH2
GO:0009074	aromatic amino acid family catabolic process	biological_process	1	83	1	151	0	0	1.819277108	Q3UEH2
GO:0016597	amino acid binding	molecular_function	1	83	1	151	0	0	1.819277108	Q3UEH2
GO:0016769	transferase activity, transferring nitrogenous groups	molecular_function	1	83	1	151	0	0	1.819277108	Q3UEH2
GO:0043648	dicarboxylic acid metabolic process	biological_process	1	83	1	151	0	0	1.819277108	Q3UEH2
GO:0046689	response to mercury ion	biological_process	1	83	1	151	0	0	1.819277108	Q3UEH2
GO:0070546	L-phenylalanine aminotransferase activity	molecular_function	1	83	1	151	0	0	1.819277108	Q3UEH2
GO:0070547	L-tyrosine aminotransferase activity	molecular_function	1	83	1	151	0	0	1.819277108	Q3UEH2
GO:0080130	L-phenylalanine:2-oxoglutarate aminotransferase activity	molecular_function	1	83	1	151	0	0	1.819277108	Q3UEH2
GO:1902221	erythrose 4-phosphate/phosphoenolpyruvate family amino acid metabolic process	biological_process	1	83	1	151	0	0	1.819277108	Q3UEH2
GO:1902222	erythrose 4-phosphate/phosphoenolpyruvate family amino acid catabolic process	biological_process	1	83	1	151	0	0	1.819277108	Q3UEH2
GO:0001542	ovulation from ovarian follicle	biological_process	1	83	1	151	0	0	1.819277108	P07724
GO:0007292	female gamete generation	biological_process	1	83	1	151	0	0	1.819277108	P07724
GO:0007548	sex differentiation	biological_process	2	83	2	151	0	0	1.819277108	P07724; A2ARV4
GO:0008207	C21-steroid hormone metabolic process	biological_process	1	83	1	151	0	0	1.819277108	P07724
GO:0008406	gonad development	biological_process	2	83	2	151	0	0	1.819277108	P07724; A2ARV4
GO:0008585	female gonad development	biological_process	1	83	1	151	0	0	1.819277108	P07724
GO:0022602	ovulation cycle process	biological_process	1	83	1	151	0	0	1.819277108	P07724
GO:0030728	ovulation	biological_process	1	83	1	151	0	0	1.819277108	P07724
GO:0031016	pancreas development	biological_process	1	83	1	151	0	0	1.819277108	P07724
GO:0034754	cellular hormone metabolic process	biological_process	1	83	1	151	0	0	1.819277108	P07724
GO:0042445	hormone metabolic process	biological_process	1	83	1	151	0	0	1.819277108	P07724
GO:0042448	progesterone metabolic process	biological_process	1	83	1	151	0	0	1.819277108	P07724
GO:0042698	ovulation cycle	biological_process	1	83	1	151	0	0	1.819277108	P07724
GO:0045137	development of primary sexual characteristics	biological_process	2	83	2	151	0	0	1.819277108	P07724; A2ARV4
GO:0046545	development of primary female sexual characteristics	biological_process	1	83	1	151	0	0	1.819277108	P07724
GO:0046660	female sex differentiation	biological_process	2	83	2	151	0	0	1.819277108	P07724; A2ARV4
GO:0060395	SMAD protein signal transduction	biological_process	1	83	1	151	0	0	1.819277108	P07724
GO:0042015	interleukin-20 binding	molecular_function	1	83	1	151	0	0	1.819277108	Q80XZ4
GO:0003774	motor activity	molecular_function	1	83	1	151	0	0	1.819277108	E9Q7P0
GO:0003777	microtubule motor activity	molecular_function	1	83	1	151	0	0	1.819277108	E9Q7P0
GO:0008569	ATP-dependent microtubule motor activity, minus-end-directed	molecular_function	1	83	1	151	0	0	1.819277108	E9Q7P0
GO:0031514	motile cilium	cellular_component	1	83	1	151	0	0	1.819277108	E9Q7P0
GO:0045502	dynein binding	molecular_function	1	83	1	151	0	0	1.819277108	E9Q7P0
GO:0045503	dynein light chain binding	molecular_function	1	83	1	151	0	0	1.819277108	E9Q7P0
GO:0045505	dynein intermediate chain binding	molecular_function	1	83	1	151	0	0	1.819277108	E9Q7P0
GO:0051959	dynein light intermediate chain binding	molecular_function	1	83	1	151	0	0	1.819277108	E9Q7P0
GO:1990939	ATP-dependent microtubule motor activity	NA	1	83	1	151	0	0	1.819277108	E9Q7P0
GO:0003810	protein-glutamine gamma-glutamyltransferase activity	molecular_function	1	83	1	151	0	0	1.819277108	A0A0R4J293
GO:0007596	blood coagulation	biological_process	2	83	2	151	0	0	1.819277108	A0A0R4J293; P31725
GO:0007599	hemostasis	biological_process	2	83	2	151	0	0	1.819277108	A0A0R4J293; P31725
GO:0016755	transferase activity, transferring amino-acyl groups	molecular_function	1	83	1	151	0	0	1.819277108	A0A0R4J293
GO:0072378	blood coagulation, fibrin clot formation	biological_process	1	83	1	151	0	0	1.819277108	A0A0R4J293
GO:0030193	regulation of blood coagulation	biological_process	1	83	1	151	0	0	1.819277108	P31725
GO:0030194	positive regulation of blood coagulation	biological_process	1	83	1	151	0	0	1.819277108	P31725
GO:0031532	actin cytoskeleton reorganization	biological_process	1	83	1	151	0	0	1.819277108	P31725
GO:0035606	peptidyl-cysteine S-trans-nitrosylation	biological_process	1	83	1	151	0	0	1.819277108	P31725
GO:0045112	integrin biosynthetic process	biological_process	1	83	1	151	0	0	1.819277108	P31725
GO:0045113	regulation of integrin biosynthetic process	biological_process	1	83	1	151	0	0	1.819277108	P31725
GO:0050818	regulation of coagulation	biological_process	1	83	1	151	0	0	1.819277108	P31725
GO:0050820	positive regulation of coagulation	biological_process	1	83	1	151	0	0	1.819277108	P31725
GO:0061041	regulation of wound healing	biological_process	1	83	1	151	0	0	1.819277108	P31725
GO:0090303	positive regulation of wound healing	biological_process	1	83	1	151	0	0	1.819277108	P31725
GO:1900046	regulation of hemostasis	biological_process	1	83	1	151	0	0	1.819277108	P31725
GO:1900048	positive regulation of hemostasis	biological_process	1	83	1	151	0	0	1.819277108	P31725
GO:0002674	negative regulation of acute inflammatory response	biological_process	1	83	1	151	0	0	1.819277108	P19157
GO:0004364	glutathione transferase activity	molecular_function	1	83	1	151	0	0	1.819277108	P19157
GO:0008432	JUN kinase binding	molecular_function	1	83	1	151	0	0	1.819277108	P19157
GO:0014003	oligodendrocyte development	biological_process	1	83	1	151	0	0	1.819277108	P19157
GO:0016765	transferase activity, transferring alkyl or aryl (other than methyl) groups	molecular_function	1	83	1	151	0	0	1.819277108	P19157
GO:0032602	chemokine production	biological_process	1	83	1	151	0	0	1.819277108	P19157
GO:0032611	interleukin-1 beta production	biological_process	1	83	1	151	0	0	1.819277108	P19157
GO:0032612	interleukin-1 production	biological_process	1	83	1	151	0	0	1.819277108	P19157
GO:0032642	regulation of chemokine production	biological_process	1	83	1	151	0	0	1.819277108	P19157
GO:0032651	regulation of interleukin-1 beta production	biological_process	1	83	1	151	0	0	1.819277108	P19157
GO:0032652	regulation of interleukin-1 production	biological_process	1	83	1	151	0	0	1.819277108	P19157
GO:0032682	negative regulation of chemokine production	biological_process	1	83	1	151	0	0	1.819277108	P19157
GO:0032691	negative regulation of interleukin-1 beta production	biological_process	1	83	1	151	0	0	1.819277108	P19157
GO:0032692	negative regulation of interleukin-1 production	biological_process	1	83	1	151	0	0	1.819277108	P19157
GO:0032720	negative regulation of tumor necrosis factor production	biological_process	1	83	1	151	0	0	1.819277108	P19157
GO:0032873	negative regulation of stress-activated MAPK cascade	biological_process	1	83	1	151	0	0	1.819277108	P19157
GO:0032928	regulation of superoxide anion generation	biological_process	1	83	1	151	0	0	1.819277108	P19157
GO:0032930	positive regulation of superoxide anion generation	biological_process	1	83	1	151	0	0	1.819277108	P19157
GO:0033591	response to L-ascorbic acid	biological_process	1	83	1	151	0	0	1.819277108	P19157
GO:0035726	common myeloid progenitor cell proliferation	biological_process	1	83	1	151	0	0	1.819277108	P19157
GO:0035730	S-nitrosoglutathione binding	molecular_function	1	83	1	151	0	0	1.819277108	P19157
GO:0035731	dinitrosyl-iron complex binding	molecular_function	1	83	1	151	0	0	1.819277108	P19157
GO:0042554	superoxide anion generation	biological_process	1	83	1	151	0	0	1.819277108	P19157
GO:0043124	negative regulation of I-kappaB kinase/NF-kappaB signaling	biological_process	1	83	1	151	0	0	1.819277108	P19157
GO:0043407	negative regulation of MAP kinase activity	biological_process	1	83	1	151	0	0	1.819277108	P19157
GO:0043508	negative regulation of JUN kinase activity	biological_process	1	83	1	151	0	0	1.819277108	P19157
GO:0046329	negative regulation of JNK cascade	biological_process	1	83	1	151	0	0	1.819277108	P19157
GO:0048144	fibroblast proliferation	biological_process	1	83	1	151	0	0	1.819277108	P19157
GO:0048145	regulation of fibroblast proliferation	biological_process	1	83	1	151	0	0	1.819277108	P19157
GO:0048147	negative regulation of fibroblast proliferation	biological_process	1	83	1	151	0	0	1.819277108	P19157
GO:0048709	oligodendrocyte differentiation	biological_process	1	83	1	151	0	0	1.819277108	P19157
GO:0051354	negative regulation of oxidoreductase activity	biological_process	1	83	1	151	0	0	1.819277108	P19157
GO:0051767	nitric-oxide synthase biosynthetic process	biological_process	1	83	1	151	0	0	1.819277108	P19157
GO:0051769	regulation of nitric-oxide synthase biosynthetic process	biological_process	1	83	1	151	0	0	1.819277108	P19157
GO:0051771	negative regulation of nitric-oxide synthase biosynthetic process	biological_process	1	83	1	151	0	0	1.819277108	P19157
GO:0070303	negative regulation of stress-activated protein kinase signaling cascade	biological_process	1	83	1	151	0	0	1.819277108	P19157
GO:0071364	cellular response to epidermal growth factor stimulus	biological_process	1	83	1	151	0	0	1.819277108	P19157
GO:0071460	cellular response to cell-matrix adhesion	biological_process	1	83	1	151	0	0	1.819277108	P19157
GO:0071605	monocyte chemotactic protein-1 production	biological_process	1	83	1	151	0	0	1.819277108	P19157
GO:0071637	regulation of monocyte chemotactic protein-1 production	biological_process	1	83	1	151	0	0	1.819277108	P19157
GO:0071638	negative regulation of monocyte chemotactic protein-1 production	biological_process	1	83	1	151	0	0	1.819277108	P19157
GO:0090322	regulation of superoxide metabolic process	biological_process	1	83	1	151	0	0	1.819277108	P19157
GO:0097057	TRAF2-GSTP1 complex	cellular_component	1	83	1	151	0	0	1.819277108	P19157
GO:1903556	negative regulation of tumor necrosis factor superfamily cytokine production	biological_process	1	83	1	151	0	0	1.819277108	P19157
GO:2000379	positive regulation of reactive oxygen species metabolic process	biological_process	1	83	1	151	0	0	1.819277108	P19157
GO:2000428	regulation of neutrophil aggregation	biological_process	1	83	1	151	0	0	1.819277108	P19157
GO:2000429	negative regulation of neutrophil aggregation	biological_process	1	83	1	151	0	0	1.819277108	P19157
GO:2000468	regulation of peroxidase activity	biological_process	1	83	1	151	0	0	1.819277108	P19157
GO:2000469	negative regulation of peroxidase activity	biological_process	1	83	1	151	0	0	1.819277108	P19157
GO:0030279	negative regulation of ossification	biological_process	1	83	1	151	0	0	1.819277108	Q14BU0
GO:0045668	negative regulation of osteoblast differentiation	biological_process	1	83	1	151	0	0	1.819277108	Q14BU0
GO:0004984	olfactory receptor activity	molecular_function	1	83	1	151	0	0	1.819277108	F8VQI7
GO:0007606	sensory perception of chemical stimulus	biological_process	1	83	1	151	0	0	1.819277108	F8VQI7
GO:0007608	sensory perception of smell	biological_process	1	83	1	151	0	0	1.819277108	F8VQI7
GO:0009593	detection of chemical stimulus	biological_process	1	83	1	151	0	0	1.819277108	F8VQI7
GO:0050906	detection of stimulus involved in sensory perception	biological_process	1	83	1	151	0	0	1.819277108	F8VQI7
GO:0050907	detection of chemical stimulus involved in sensory perception	biological_process	1	83	1	151	0	0	1.819277108	F8VQI7
GO:0050911	detection of chemical stimulus involved in sensory perception of smell	biological_process	1	83	1	151	0	0	1.819277108	F8VQI7
GO:0051606	detection of stimulus	biological_process	1	83	1	151	0	0	1.819277108	F8VQI7
GO:0002576	platelet degranulation	biological_process	1	83	1	151	0	0	1.819277108	O35887
GO:0014012	peripheral nervous system axon regeneration	biological_process	1	83	1	151	0	0	1.819277108	O35887
GO:0016528	sarcoplasm	cellular_component	1	83	1	151	0	0	1.819277108	O35887
GO:0016529	sarcoplasmic reticulum	cellular_component	1	83	1	151	0	0	1.819277108	O35887
GO:0033018	sarcoplasmic reticulum lumen	cellular_component	1	83	1	151	0	0	1.819277108	O35887
GO:0003128	heart field specification	biological_process	1	83	1	151	0	0	1.819277108	A2ARV4
GO:0003139	secondary heart field specification	biological_process	1	83	1	151	0	0	1.819277108	A2ARV4
GO:0003148	outflow tract septum morphogenesis	biological_process	1	83	1	151	0	0	1.819277108	A2ARV4
GO:0003151	outflow tract morphogenesis	biological_process	1	83	1	151	0	0	1.819277108	A2ARV4
GO:0003206	cardiac chamber morphogenesis	biological_process	1	83	1	151	0	0	1.819277108	A2ARV4
GO:0003208	cardiac ventricle morphogenesis	biological_process	1	83	1	151	0	0	1.819277108	A2ARV4
GO:0003223	ventricular compact myocardium morphogenesis	biological_process	1	83	1	151	0	0	1.819277108	A2ARV4
GO:0003229	ventricular cardiac muscle tissue development	biological_process	1	83	1	151	0	0	1.819277108	A2ARV4
GO:0006835	dicarboxylic acid transport	biological_process	1	83	1	151	0	0	1.819277108	A2ARV4
GO:0008584	male gonad development	biological_process	1	83	1	151	0	0	1.819277108	A2ARV4
GO:0009897	external side of plasma membrane	cellular_component	1	83	1	151	0	0	1.819277108	A2ARV4
GO:0009950	dorsal/ventral axis specification	biological_process	1	83	1	151	0	0	1.819277108	A2ARV4
GO:0009953	dorsal/ventral pattern formation	biological_process	1	83	1	151	0	0	1.819277108	A2ARV4
GO:0010092	specification of animal organ identity	biological_process	1	83	1	151	0	0	1.819277108	A2ARV4
GO:0015884	folic acid transport	biological_process	1	83	1	151	0	0	1.819277108	A2ARV4
GO:0015886	heme transport	biological_process	1	83	1	151	0	0	1.819277108	A2ARV4
GO:0017147	Wnt-protein binding	molecular_function	1	83	1	151	0	0	1.819277108	A2ARV4
GO:0020028	hemoglobin import	biological_process	1	83	1	151	0	0	1.819277108	A2ARV4
GO:0030509	BMP signaling pathway	biological_process	1	83	1	151	0	0	1.819277108	A2ARV4
GO:0030510	regulation of BMP signaling pathway	biological_process	1	83	1	151	0	0	1.819277108	A2ARV4
GO:0030514	negative regulation of BMP signaling pathway	biological_process	1	83	1	151	0	0	1.819277108	A2ARV4
GO:0030540	female genitalia development	biological_process	1	83	1	151	0	0	1.819277108	A2ARV4
GO:0038024	cargo receptor activity	molecular_function	1	83	1	151	0	0	1.819277108	A2ARV4
GO:0042562	hormone binding	molecular_function	1	83	1	151	0	0	1.819277108	A2ARV4
GO:0042813	Wnt-activated receptor activity	molecular_function	1	83	1	151	0	0	1.819277108	A2ARV4
GO:0042953	lipoprotein transport	biological_process	1	83	1	151	0	0	1.819277108	A2ARV4
GO:0044332	Wnt signaling pathway involved in dorsal/ventral axis specification	biological_process	1	83	1	151	0	0	1.819277108	A2ARV4
GO:0044872	lipoprotein localization	biological_process	1	83	1	151	0	0	1.819277108	A2ARV4
GO:0045056	transcytosis	biological_process	1	83	1	151	0	0	1.819277108	A2ARV4
GO:0046546	development of primary male sexual characteristics	biological_process	1	83	1	151	0	0	1.819277108	A2ARV4
GO:0046661	male sex differentiation	biological_process	1	83	1	151	0	0	1.819277108	A2ARV4
GO:0048645	animal organ formation	biological_process	1	83	1	151	0	0	1.819277108	A2ARV4
GO:0048806	genitalia development	biological_process	1	83	1	151	0	0	1.819277108	A2ARV4
GO:0050750	low-density lipoprotein particle receptor binding	molecular_function	1	83	1	151	0	0	1.819277108	A2ARV4
GO:0051180	vitamin transport	biological_process	1	83	1	151	0	0	1.819277108	A2ARV4
GO:0051181	cofactor transport	biological_process	1	83	1	151	0	0	1.819277108	A2ARV4
GO:0055008	cardiac muscle tissue morphogenesis	biological_process	1	83	1	151	0	0	1.819277108	A2ARV4
GO:0055010	ventricular cardiac muscle tissue morphogenesis	biological_process	1	83	1	151	0	0	1.819277108	A2ARV4
GO:0060068	vagina development	biological_process	1	83	1	151	0	0	1.819277108	A2ARV4
GO:0060411	cardiac septum morphogenesis	biological_process	1	83	1	151	0	0	1.819277108	A2ARV4
GO:0060914	heart formation	biological_process	1	83	1	151	0	0	1.819277108	A2ARV4
GO:0060976	coronary vasculature development	biological_process	1	83	1	151	0	0	1.819277108	A2ARV4
GO:0060977	coronary vasculature morphogenesis	biological_process	1	83	1	151	0	0	1.819277108	A2ARV4
GO:0060982	coronary artery morphogenesis	biological_process	1	83	1	151	0	0	1.819277108	A2ARV4
GO:0061156	pulmonary artery morphogenesis	biological_process	1	83	1	151	0	0	1.819277108	A2ARV4
GO:0070444	oligodendrocyte progenitor proliferation	biological_process	1	83	1	151	0	0	1.819277108	A2ARV4
GO:0070445	regulation of oligodendrocyte progenitor proliferation	biological_process	1	83	1	151	0	0	1.819277108	A2ARV4
GO:0070447	positive regulation of oligodendrocyte progenitor proliferation	biological_process	1	83	1	151	0	0	1.819277108	A2ARV4
GO:0071772	response to BMP	biological_process	1	83	1	151	0	0	1.819277108	A2ARV4
GO:0071773	cellular response to BMP stimulus	biological_process	1	83	1	151	0	0	1.819277108	A2ARV4
GO:0072337	modified amino acid transport	biological_process	1	83	1	151	0	0	1.819277108	A2ARV4
GO:0090092	regulation of transmembrane receptor protein serine/threonine kinase signaling pathway	biological_process	1	83	1	151	0	0	1.819277108	A2ARV4
GO:0090101	negative regulation of transmembrane receptor protein serine/threonine kinase signaling pathway	biological_process	1	83	1	151	0	0	1.819277108	A2ARV4
GO:0090288	negative regulation of cellular response to growth factor stimulus	biological_process	1	83	1	151	0	0	1.819277108	A2ARV4
GO:1901678	iron coordination entity transport	biological_process	1	83	1	151	0	0	1.819277108	A2ARV4
GO:1904447	folic acid import into cell	biological_process	1	83	1	151	0	0	1.819277108	A2ARV4
GO:2000179	positive regulation of neural precursor cell proliferation	biological_process	1	83	1	151	0	0	1.819277108	A2ARV4
GO:0005198	structural molecule activity	molecular_function	13	83	14	151	0.000133972	0.000277627	1.689328744	A2A513; Q9QWL7; P08730; A0JLR7; Q3UN62; Q9Z2K1; Q8K173; Q3UV17; F6RX08; O55124; Q922U2; P50446; F2Z472
GO:0005576	extracellular region	cellular_component	45	83	66	151	0.001096706	0.002271265	1.24041621	Q3U7T5; A8DUK4; Q3UWC2; Q14B74; Q9QWL7; D3YUE8; Q9D4N6; P08730; A0JLR7; Q07563; Q3UN62; A2ABP5; Q3SXH3; A7YL62; Q9Z2K1; Q8K173; Q3UEK0; Q7TPZ8; Q00898; P27005; Q3ULL0; A0A0N4SUN4; Q3UV17; A0A0R4J135; Q3UYR9; Q80UW0; P18419; P16045; Q99KL8; Q8CCC2; Q922U2; Q91VB8; A2AJ14; P50446; Q8BSU1; F8WH42; F2Z472; A0A0R4J0G1; P07724; A0A0R4J293; P31725; P19157; Q14BU0; O35887; A2ARV4
GO:0044421	extracellular region part	cellular_component	42	83	62	151	0.002404031	0.004975647	1.232413525	Q3U7T5; A8DUK4; Q3UWC2; Q14B74; Q9QWL7; D3YUE8; Q9D4N6; P08730; A0JLR7; Q07563; A2ABP5; Q3SXH3; A7YL62; Q9Z2K1; Q8K173; Q3UEK0; Q7TPZ8; Q00898; P27005; Q3ULL0; A0A0N4SUN4; Q3UV17; A0A0R4J135; Q3UYR9; Q80UW0; P18419; P16045; Q99KL8; Q8CCC2; Q922U2; Q91VB8; A2AJ14; P50446; Q8BSU1; F8WH42; A0A0R4J0G1; P07724; A0A0R4J293; P31725; P19157; Q14BU0; A2ARV4
GO:0005615	extracellular space	cellular_component	24	83	33	151	0.005196491	0.010748598	1.323110624	Q3U7T5; A8DUK4; Q3UWC2; A2ABP5; Q3SXH3; A7YL62; Q8K173; Q3UEK0; Q7TPZ8; Q00898; P27005; A0A0R4J135; P18419; P16045; Q8CCC2; Q91VB8; F8WH42; A0A0R4J0G1; P07724; A0A0R4J293; P31725; P19157; Q14BU0; A2ARV4
GO:0043588	skin development	biological_process	7	83	8	151	0.007105196	0.014651465	1.59186747	A2A513; Q64446; Q9QWL7; Q9Z2K1; Q8K173; Q3UV17; P50446
GO:0034248	regulation of cellular amide metabolic process	biological_process	7	83	8	151	0.007105196	0.014651465	1.59186747	B2RWS6; Q9QWL7; D3YUE8; A2ACL2; F6RX08; Q8BSU1; P31725
GO:0098754	detoxification	biological_process	7	83	8	151	0.007105196	0.014651465	1.59186747	A8DUK4; Q64446; P27005; Q99KL8; Q91VB8; P31725; P19157
GO:0098869	cellular oxidant detoxification	biological_process	7	83	8	151	0.007105196	0.014651465	1.59186747	A8DUK4; Q64446; P27005; Q99KL8; Q91VB8; P31725; P19157
GO:1990748	cellular detoxification	biological_process	7	83	8	151	0.007105196	0.014651465	1.59186747	A8DUK4; Q64446; P27005; Q99KL8; Q91VB8; P31725; P19157
GO:0014070	response to organic cyclic compound	biological_process	12	83	15	151	0.007747909	0.015966974	1.455421687	B2RWS6; Q9D4N6; Q3TIA9; Q3SXH3; A7YL62; A2ACL2; P16045; Q99KL8; Q91VB8; Q3UEH2; P19157; O35887
GO:0010033	response to organic substance	biological_process	27	83	39	151	0.010977091	0.022607821	1.259499537	Q3U7T5; B2RWS6; Q64446; Q9D4N6; P08730; Q3TIA9; Q3SXH3; A7YL62; Q8K173; A2ACL2; Q00898; P27005; F6RX08; P16045; Q99KL8; Q8CCC2; Q91VB8; A2AJ14; Q8BSU1; Q3UED7; Q3UEH2; P07724; Q80XZ4; P31725; P19157; O35887; A2ARV4
GO:0009636	response to toxic substance	biological_process	9	83	11	151	0.011307556	0.023274141	1.488499452	B2RWS6; A8DUK4; Q64446; Q3TIA9; P27005; Q99KL8; Q91VB8; P31725; P19157
GO:0033993	response to lipid	biological_process	11	83	14	151	0.013131939	0.027012664	1.429432014	B2RWS6; Q9D4N6; P08730; Q3SXH3; A7YL62; P27005; Q99KL8; Q8CCC2; Q3UEH2; P31725; P19157
GO:2001233	regulation of apoptotic signaling pathway	biological_process	6	83	7	151	0.013462477	0.027574244	1.559380379	Q3U7T5; Q3UEK0; Q9CZW2; P27005; P31725; P19157
GO:0006417	regulation of translation	biological_process	6	83	7	151	0.013462477	0.027574244	1.559380379	B2RWS6; Q9QWL7; A2ACL2; F6RX08; Q8BSU1; P31725
GO:0010608	posttranscriptional regulation of gene expression	biological_process	6	83	7	151	0.013462477	0.027574244	1.559380379	B2RWS6; Q9QWL7; A2ACL2; F6RX08; Q8BSU1; P31725
GO:0071396	cellular response to lipid	biological_process	6	83	7	151	0.013462477	0.027574244	1.559380379	B2RWS6; Q9D4N6; P08730; Q3SXH3; Q8CCC2; P19157
GO:0016209	antioxidant activity	molecular_function	6	83	7	151	0.013462477	0.027574244	1.559380379	A8DUK4; P27005; Q99KL8; Q91VB8; P31725; P19157
GO:0008284	positive regulation of cell proliferation	biological_process	6	83	7	151	0.013462477	0.027574244	1.559380379	Q64446; A0A0A6YWT3; A2AUN0; Q8CCC2; F8WH42; A2ARV4
GO:0016023	cytoplasmic, membrane-bounded vesicle	cellular_component	6	83	7	151	0.013462477	0.027574244	1.559380379	Q64446; Q3UN62; A2APZ1; F2Z472; O35887; A2ARV4
GO:0048729	tissue morphogenesis	biological_process	13	83	17	151	0.013473572	0.027580132	1.391211906	Q64446; Q9QWL7; A0A0A6YWT3; Q9Z2K1; Q8K173; A2ACL2; Q3ULL0; Q3UYR9; G5E8N3; P50446; Q9CVL5; F8WH42; A2ARV4
GO:0097190	apoptotic signaling pathway	biological_process	8	83	10	151	0.019787199	0.04038081	1.455421687	Q3U7T5; B2RWS6; Q64446; Q3UEK0; Q9CZW2; P27005; P31725; P19157
GO:0008270	zinc ion binding	molecular_function	8	83	10	151	0.019787199	0.04038081	1.455421687	B2RWS6; Q14B74; G3UYU0; Q7TPZ8; A2ACL2; P27005; G5E8N3; P31725
GO:0007159	leukocyte cell-cell adhesion	biological_process	8	83	10	151	0.019787199	0.04038081	1.455421687	Q64446; A0A0A6YWT3; Q3UEK0; P27005; P16045; Q8CCC2; P31725; P19157
GO:0034109	homotypic cell-cell adhesion	biological_process	8	83	10	151	0.019787199	0.04038081	1.455421687	Q64446; A0A0A6YWT3; Q3UEK0; P27005; P16045; Q8CCC2; P31725; P19157
GO:0070486	leukocyte aggregation	biological_process	8	83	10	151	0.019787199	0.04038081	1.455421687	Q64446; A0A0A6YWT3; Q3UEK0; P27005; P16045; Q8CCC2; P31725; P19157
GO:0032502	developmental process	biological_process	47	83	75	151	0.019860177	0.040480494	1.140080321	Q8CCS3; A2A513; Q3U7T5; B2RWS6; Q80VP1; Q64446; Q9QWL7; D3YUE8; Q9D4N6; P08730; P70354; Q3TIA9; A0A0A6YWT3; Q3UN62; A2ABP5; A7YL62; Q9Z2K1; Q8K173; Q3UEK0; A2ACL2; A2AUN0; P27005; Q3ULL0; Q8C7U1; Q3UV17; Q62488; Q3UYR9; O55124; Q6ZPG8; P16045; Q99KL8; Q8CCC2; G5E8N3; A2APZ1; Q9Z211; Q9ESY2; Q91VB8; P50446; Q9CVL5; Q8BSU1; F8WH42; P07724; P31725; P19157; Q14BU0; O35887; A2ARV4
GO:0044767	single-organism developmental process	biological_process	47	83	75	151	0.019860177	0.040480494	1.140080321	Q8CCS3; A2A513; Q3U7T5; B2RWS6; Q80VP1; Q64446; Q9QWL7; D3YUE8; Q9D4N6; P08730; P70354; Q3TIA9; A0A0A6YWT3; Q3UN62; A2ABP5; A7YL62; Q9Z2K1; Q8K173; Q3UEK0; A2ACL2; A2AUN0; P27005; Q3ULL0; Q8C7U1; Q3UV17; Q62488; Q3UYR9; O55124; Q6ZPG8; P16045; Q99KL8; Q8CCC2; G5E8N3; A2APZ1; Q9Z211; Q9ESY2; Q91VB8; P50446; Q9CVL5; Q8BSU1; F8WH42; P07724; P31725; P19157; Q14BU0; O35887; A2ARV4
GO:0042221	response to chemical	biological_process	34	83	52	151	0.020281015	0.041313179	1.18952734	A2A513; Q3U7T5; B2RWS6; A8DUK4; Q3UWC2; Q64446; Q9D4N6; P08730; Q3TIA9; A2ABP5; Q3SXH3; A7YL62; Q8K173; Q3UEK0; A2ACL2; Q00898; P27005; F6RX08; Q6ZPG8; P16045; Q99KL8; Q8CCC2; Q91VB8; A2AJ14; Q8BSU1; Q3UED7; Q3UEH2; P07724; Q80XZ4; P31725; P19157; F8VQI7; O35887; A2ARV4
GO:0010556	regulation of macromolecule biosynthetic process	biological_process	19	83	27	151	0.021883491	0.044550432	1.280232039	B2RWS6; Q9QWL7; P70354; Q3V3I1; A0A0A6YWT3; A7YL62; A2ACL2; Q3ULL0; Q62488; F6RX08; Q8CCC2; G5E8N3; Q80UY3; A0A1B0GSS6; Q8BSU1; F8WH42; P31725; P19157; A2ARV4
GO:1901701	cellular response to oxygen-containing compound	biological_process	10	83	13	151	0.021913036	0.044583526	1.39944393	B2RWS6; Q64446; Q9D4N6; P08730; Q8K173; P16045; Q99KL8; Q8CCC2; Q8BSU1; P19157
GO:0043169	cation binding	molecular_function	28	83	42	151	0.023241617	0.047257954	1.212851406	Q8CCS3; B2RWS6; D3YYG4; A8DUK4; Q14B74; Q64446; Q9D4N6; G3UYU0; A7YL62; Q6WIZ7; Q8K173; Q7TPZ8; A2ACL2; P27005; A0A0N4SUN4; Q3UHF8; Q3UYR9; G5E8N3; Q80UY3; A0A1B0GSS6; Q91VB8; A2AJ14; Q9CVL5; P07724; A0A0R4J293; P31725; O35887; A2ARV4
GO:0002790	peptide secretion	biological_process	5	83	6	151	0.025351418	0.05133012	1.516064257	B2RWS6; A7YL62; P27005; F8WH42; P31725
GO:0003002	regionalization	biological_process	5	83	6	151	0.025351418	0.05133012	1.516064257	B2RWS6; A0A0A6YWT3; Q3ULL0; G5E8N3; A2ARV4
GO:0007389	pattern specification process	biological_process	5	83	6	151	0.025351418	0.05133012	1.516064257	B2RWS6; A0A0A6YWT3; Q3ULL0; G5E8N3; A2ARV4
GO:0007517	muscle organ development	biological_process	5	83	6	151	0.025351418	0.05133012	1.516064257	B2RWS6; Q8K173; O55124; F8WH42; A2ARV4
GO:0045471	response to ethanol	biological_process	5	83	6	151	0.025351418	0.05133012	1.516064257	B2RWS6; P27005; Q99KL8; P31725; P19157
GO:0051046	regulation of secretion	biological_process	5	83	6	151	0.025351418	0.05133012	1.516064257	B2RWS6; A7YL62; P27005; F8WH42; P31725
GO:0042063	gliogenesis	biological_process	5	83	6	151	0.025351418	0.05133012	1.516064257	P27005; F8WH42; P31725; P19157; A2ARV4
GO:0051171	regulation of nitrogen compound metabolic process	biological_process	20	83	29	151	0.027761791	0.056176604	1.254673868	B2RWS6; Q64446; Q9QWL7; D3YUE8; Q9D4N6; P70354; A0JLR7; Q3V3I1; A0A0A6YWT3; A2ACL2; Q3ULL0; Q62488; F6RX08; G5E8N3; Q80UY3; A0A1B0GSS6; Q8BSU1; F8WH42; P31725; A2ARV4
GO:0046872	metal ion binding	molecular_function	27	83	41	151	0.033086855	0.066911633	1.198060535	Q8CCS3; B2RWS6; D3YYG4; A8DUK4; Q14B74; Q64446; Q9D4N6; G3UYU0; Q6WIZ7; Q8K173; Q7TPZ8; A2ACL2; P27005; A0A0N4SUN4; Q3UHF8; Q3UYR9; G5E8N3; Q80UY3; A0A1B0GSS6; Q91VB8; A2AJ14; Q9CVL5; P07724; A0A0R4J293; P31725; O35887; A2ARV4
GO:0097435	fibril organization	biological_process	7	83	9	151	0.034134755	0.068740758	1.414993307	A2A513; B2RWS6; Q64446; Q9QWL7; Q8K173; O55124; P50446
GO:0010942	positive regulation of cell death	biological_process	7	83	9	151	0.034134755	0.068740758	1.414993307	Q3U7T5; B2RWS6; Q9CZW2; P27005; Q99KL8; Q8CCC2; P31725
GO:0006357	regulation of transcription from RNA polymerase II promoter	biological_process	7	83	9	151	0.034134755	0.068740758	1.414993307	B2RWS6; P70354; Q3V3I1; A0A0A6YWT3; F6RX08; F8WH42; A2ARV4
GO:0006366	transcription from RNA polymerase II promoter	biological_process	7	83	9	151	0.034134755	0.068740758	1.414993307	B2RWS6; P70354; Q3V3I1; A0A0A6YWT3; F6RX08; F8WH42; A2ARV4
GO:0030098	lymphocyte differentiation	biological_process	7	83	9	151	0.034134755	0.068740758	1.414993307	B2RWS6; Q64446; A0A0A6YWT3; Q3UEK0; P16045; Q8CCC2; Q9CVL5
GO:0046903	secretion	biological_process	7	83	9	151	0.034134755	0.068740758	1.414993307	B2RWS6; A7YL62; P27005; F8WH42; P31725; O35887; A2ARV4
GO:0070848	response to growth factor	biological_process	7	83	9	151	0.034134755	0.068740758	1.414993307	B2RWS6; Q64446; Q8K173; A2ACL2; F6RX08; P19157; A2ARV4
GO:0002009	morphogenesis of an epithelium	biological_process	11	83	15	151	0.034668059	0.069772849	1.334136546	Q64446; Q9QWL7; A0A0A6YWT3; Q9Z2K1; A2ACL2; Q3ULL0; G5E8N3; P50446; Q9CVL5; F8WH42; A2ARV4
GO:0007275	multicellular organism development	biological_process	39	83	62	151	0.035369202	0.071141291	1.144383988	Q8CCS3; A2A513; B2RWS6; Q80VP1; Q64446; Q9QWL7; D3YUE8; Q9D4N6; P08730; P70354; Q3TIA9; A0A0A6YWT3; A2ABP5; A7YL62; Q9Z2K1; Q8K173; Q3UEK0; A2ACL2; P27005; Q3ULL0; Q8C7U1; Q3UV17; Q3UYR9; O55124; Q6ZPG8; P16045; Q8CCC2; G5E8N3; Q9ESY2; Q91VB8; P50446; Q9CVL5; Q8BSU1; F8WH42; P07724; P31725; P19157; O35887; A2ARV4
GO:0031988	membrane-bounded vesicle	cellular_component	31	83	48	151	0.035492162	0.071345838	1.174949799	Q3U7T5; Q3UWC2; Q64446; Q9QWL7; D3YUE8; Q9D4N6; P08730; A0JLR7; Q3UN62; A7YL62; Q9Z2K1; Q3UEK0; Q00898; P27005; Q3ULL0; A0A0N4SUN4; Q3UV17; A0A0R4J135; Q3UYR9; Q80UW0; P16045; Q99KL8; Q922U2; A2APZ1; P50446; Q8BSU1; F2Z472; P31725; P19157; O35887; A2ARV4
GO:1901700	response to oxygen-containing compound	biological_process	16	83	23	151	0.037723364	0.07578556	1.265584075	B2RWS6; Q64446; Q9D4N6; P08730; Q3TIA9; A7YL62; Q8K173; Q00898; P27005; P16045; Q99KL8; Q8CCC2; A2AJ14; Q8BSU1; P31725; P19157
GO:0048513	animal organ development	biological_process	28	83	43	151	0.03814496	0.076586678	1.184645559	A2A513; B2RWS6; Q80VP1; Q64446; Q9QWL7; D3YUE8; Q9D4N6; P08730; Q3TIA9; A0A0A6YWT3; A7YL62; Q9Z2K1; Q8K173; Q3UEK0; Q3ULL0; Q3UV17; O55124; P16045; Q8CCC2; G5E8N3; Q9ESY2; Q91VB8; P50446; Q9CVL5; F8WH42; P07724; P19157; A2ARV4
GO:0048856	anatomical structure development	biological_process	41	83	66	151	0.04223303	0.084743908	1.130156992	Q8CCS3; A2A513; B2RWS6; Q80VP1; Q64446; Q9QWL7; D3YUE8; Q9D4N6; P08730; P70354; Q3TIA9; A0A0A6YWT3; Q3UN62; A2ABP5; A7YL62; Q9Z2K1; Q8K173; Q3UEK0; A2ACL2; P27005; Q3ULL0; Q8C7U1; Q3UV17; Q62488; Q3UYR9; O55124; Q6ZPG8; P16045; Q8CCC2; G5E8N3; Q9ESY2; Q91VB8; P50446; Q9CVL5; Q8BSU1; F8WH42; P07724; P31725; P19157; O35887; A2ARV4
GO:0043230	extracellular organelle	cellular_component	29	83	45	151	0.043452624	0.08708695	1.172423025	Q3U7T5; A8DUK4; Q3UWC2; Q9QWL7; D3YUE8; Q9D4N6; P08730; A0JLR7; A7YL62; Q9Z2K1; Q3UEK0; Q00898; P27005; Q3ULL0; A0A0N4SUN4; Q3UV17; A0A0R4J135; Q3UYR9; Q80UW0; P16045; Q99KL8; Q922U2; Q91VB8; A2AJ14; P50446; Q8BSU1; P31725; P19157; A2ARV4
GO:1903561	extracellular vesicle	cellular_component	29	83	45	151	0.043452624	0.08708695	1.172423025	Q3U7T5; A8DUK4; Q3UWC2; Q9QWL7; D3YUE8; Q9D4N6; P08730; A0JLR7; A7YL62; Q9Z2K1; Q3UEK0; Q00898; P27005; Q3ULL0; A0A0N4SUN4; Q3UV17; A0A0R4J135; Q3UYR9; Q80UW0; P16045; Q99KL8; Q922U2; Q91VB8; A2AJ14; P50446; Q8BSU1; P31725; P19157; A2ARV4
GO:0009913	epidermal cell differentiation	biological_process	4	83	5	151	0.047452655	0.093814766	1.455421687	A2A513; Q9QWL7; Q9Z2K1; P50446
GO:0030216	keratinocyte differentiation	biological_process	4	83	5	151	0.047452655	0.093814766	1.455421687	A2A513; Q9QWL7; Q9Z2K1; P50446
GO:0006919	activation of cysteine-type endopeptidase activity involved in apoptotic process	biological_process	4	83	5	151	0.047452655	0.093814766	1.455421687	Q3U7T5; Q9CZW2; P27005; P31725
GO:0010950	positive regulation of endopeptidase activity	biological_process	4	83	5	151	0.047452655	0.093814766	1.455421687	Q3U7T5; Q9CZW2; P27005; P31725
GO:0010952	positive regulation of peptidase activity	biological_process	4	83	5	151	0.047452655	0.093814766	1.455421687	Q3U7T5; Q9CZW2; P27005; P31725
GO:0031638	zymogen activation	biological_process	4	83	5	151	0.047452655	0.093814766	1.455421687	Q3U7T5; Q9CZW2; P27005; P31725
GO:0043280	positive regulation of cysteine-type endopeptidase activity involved in apoptotic process	biological_process	4	83	5	151	0.047452655	0.093814766	1.455421687	Q3U7T5; Q9CZW2; P27005; P31725
GO:0097202	activation of cysteine-type endopeptidase activity	biological_process	4	83	5	151	0.047452655	0.093814766	1.455421687	Q3U7T5; Q9CZW2; P27005; P31725
GO:2001056	positive regulation of cysteine-type endopeptidase activity	biological_process	4	83	5	151	0.047452655	0.093814766	1.455421687	Q3U7T5; Q9CZW2; P27005; P31725
GO:0000122	negative regulation of transcription from RNA polymerase II promoter	biological_process	4	83	5	151	0.047452655	0.093814766	1.455421687	B2RWS6; P70354; A0A0A6YWT3; F6RX08
GO:0016570	histone modification	biological_process	4	83	5	151	0.047452655	0.093814766	1.455421687	B2RWS6; P70354; G5E8N3; F8WH42
GO:0031960	response to corticosteroid	biological_process	4	83	5	151	0.047452655	0.093814766	1.455421687	B2RWS6; A7YL62; Q3UEH2; P19157
GO:0033044	regulation of chromosome organization	biological_process	4	83	5	151	0.047452655	0.093814766	1.455421687	B2RWS6; P70354; F6RX08; F8WH42
GO:0034599	cellular response to oxidative stress	biological_process	4	83	5	151	0.047452655	0.093814766	1.455421687	B2RWS6; Q64446; Q3UEK0; Q99KL8
GO:0051384	response to glucocorticoid	biological_process	4	83	5	151	0.047452655	0.093814766	1.455421687	B2RWS6; A7YL62; Q3UEH2; P19157
GO:0071229	cellular response to acid chemical	biological_process	4	83	5	151	0.047452655	0.093814766	1.455421687	B2RWS6; Q64446; P08730; Q8K173
GO:0009308	amine metabolic process	biological_process	4	83	5	151	0.047452655	0.093814766	1.455421687	D3YYG4; Q64446; A7YL62; Q6WIZ7
GO:0097164	ammonium ion metabolic process	biological_process	4	83	5	151	0.047452655	0.093814766	1.455421687	D3YYG4; Q64446; A7YL62; Q8BQN4
GO:0048568	embryonic organ development	biological_process	4	83	5	151	0.047452655	0.093814766	1.455421687	Q80VP1; G5E8N3; Q9CVL5; F8WH42
GO:0045786	negative regulation of cell cycle	biological_process	4	83	5	151	0.047452655	0.093814766	1.455421687	Q9CZW2; F6RX08; Q8CCC2; F8WH42
GO:0002237	response to molecule of bacterial origin	biological_process	4	83	5	151	0.047452655	0.093814766	1.455421687	P27005; Q8CCC2; P31725; P19157
GO:0010001	glial cell differentiation	biological_process	4	83	5	151	0.047452655	0.093814766	1.455421687	P27005; F8WH42; P31725; P19157
GO:0032496	response to lipopolysaccharide	biological_process	4	83	5	151	0.047452655	0.093814766	1.455421687	P27005; Q8CCC2; P31725; P19157
GO:0009059	macromolecule biosynthetic process	biological_process	23	83	35	151	0.048226226	0.09528798	1.195524957	B2RWS6; Q64446; Q9QWL7; P70354; Q3V3I1; A0A0A6YWT3; A7YL62; A2ACL2; Q3ULL0; Q62488; F6RX08; Q3UYR9; Q80UW0; Q8CCC2; G5E8N3; Q80UY3; A0A1B0GSS6; A2AJ14; Q8BSU1; F8WH42; P31725; P19157; A2ARV4
GO:0009889	regulation of biosynthetic process	biological_process	20	83	30	151	0.048828789	0.09642177	1.212851406	B2RWS6; Q9QWL7; Q9D4N6; P70354; Q3V3I1; A0A0A6YWT3; A7YL62; A2ACL2; Q3ULL0; Q62488; F6RX08; Q8CCC2; G5E8N3; Q80UY3; A0A1B0GSS6; Q8BSU1; F8WH42; P31725; P19157; A2ARV4
GO:0044707	single-multicellular organism process	biological_process	43	83	70	151	0.04947767	0.097645636	1.117555938	Q8CCS3; A2A513; B2RWS6; Q80VP1; Q64446; Q9QWL7; D3YUE8; Q9D4N6; P08730; P70354; Q3TIA9; A0A0A6YWT3; A2ABP5; A7YL62; Q9Z2K1; Q8K173; Q3UEK0; A2ACL2; P27005; Q3ULL0; Q8C7U1; Q3UV17; Q3UYR9; O55124; Q6ZPG8; P16045; Q8CCC2; G5E8N3; Q9ESY2; Q91VB8; P50446; Q9CVL5; Q8BSU1; F8WH42; F2Z472; P07724; A0A0R4J293; P31725; P19157; Q14BU0; F8VQI7; O35887; A2ARV4
GO:0018193	peptidyl-amino acid modification	biological_process	10	83	14	151	0.054110391	0.106662962	1.299483649	B2RWS6; Q64446; P70354; A7YL62; P27005; Q8CCC2; G5E8N3; Q8BSU1; F8WH42; P31725
GO:0043603	cellular amide metabolic process	biological_process	10	83	14	151	0.054110391	0.106662962	1.299483649	B2RWS6; Q9QWL7; D3YUE8; Q3TIA9; Q3UEK0; A2ACL2; F6RX08; Q8BSU1; P31725; P19157
GO:0031982	vesicle	cellular_component	35	83	56	151	0.054590106	0.107545394	1.137048193	Q3U7T5; A8DUK4; Q3UWC2; Q64446; Q9QWL7; D3YUE8; Q9D4N6; P08730; A0JLR7; Q3UN62; A7YL62; Q9Z2K1; Q3UEK0; Q00898; P27005; Q3ULL0; A0A0N4SUN4; Q3UV17; A0A0R4J135; Q3UYR9; Q80UW0; P16045; Q99KL8; Q8CCC2; Q922U2; A2APZ1; Q91VB8; A2AJ14; P50446; Q8BSU1; F2Z472; P31725; P19157; O35887; A2ARV4
GO:0002376	immune system process	biological_process	18	83	27	151	0.057803297	0.113325965	1.212851406	Q3U7T5; B2RWS6; Q64446; D3YUE8; Q3V3I1; A0A0A6YWT3; A7YL62; Q9Z2K1; Q8K173; Q3UEK0; P27005; P16045; Q8CCC2; A2APZ1; Q91VB8; Q9CVL5; F8WH42; P31725
GO:0002521	leukocyte differentiation	biological_process	8	83	11	151	0.057945592	0.113325965	1.323110624	B2RWS6; Q64446; A0A0A6YWT3; Q3UEK0; P16045; Q8CCC2; Q9CVL5; F8WH42
GO:0008544	epidermis development	biological_process	6	83	8	151	0.057963444	0.113325965	1.364457831	A2A513; Q64446; Q9QWL7; Q9Z2K1; Q3UV17; P50446
GO:0043065	positive regulation of apoptotic process	biological_process	6	83	8	151	0.057963444	0.113325965	1.364457831	Q3U7T5; Q9CZW2; P27005; Q99KL8; Q8CCC2; P31725
GO:0043068	positive regulation of programmed cell death	biological_process	6	83	8	151	0.057963444	0.113325965	1.364457831	Q3U7T5; Q9CZW2; P27005; Q99KL8; Q8CCC2; P31725
GO:0006412	translation	biological_process	6	83	8	151	0.057963444	0.113325965	1.364457831	B2RWS6; Q9QWL7; A2ACL2; F6RX08; Q8BSU1; P31725
GO:0043043	peptide biosynthetic process	biological_process	6	83	8	151	0.057963444	0.113325965	1.364457831	B2RWS6; Q9QWL7; A2ACL2; F6RX08; Q8BSU1; P31725
GO:0048545	response to steroid hormone	biological_process	6	83	8	151	0.057963444	0.113325965	1.364457831	B2RWS6; Q3SXH3; A7YL62; Q99KL8; Q3UEH2; P19157
GO:0071363	cellular response to growth factor stimulus	biological_process	6	83	8	151	0.057963444	0.113325965	1.364457831	B2RWS6; Q64446; Q8K173; A2ACL2; P19157; A2ARV4
GO:0071407	cellular response to organic cyclic compound	biological_process	6	83	8	151	0.057963444	0.113325965	1.364457831	B2RWS6; Q9D4N6; Q3SXH3; A2ACL2; P16045; P19157
GO:0004888	transmembrane signaling receptor activity	molecular_function	6	83	8	151	0.057963444	0.113325965	1.364457831	Q9QWL7; Q8CCC2; Q8BSU1; Q80XZ4; F8VQI7; A2ARV4
GO:0003006	developmental process involved in reproduction	biological_process	6	83	8	151	0.057963444	0.113325965	1.364457831	Q3UN62; Q62488; Q9CVL5; F8WH42; P07724; A2ARV4
GO:0022402	cell cycle process	biological_process	6	83	8	151	0.057963444	0.113325965	1.364457831	Q9CZW2; A2ACL2; F6RX08; Q8CCC2; G5E8N3; F8WH42
GO:0070062	extracellular exosome	cellular_component	28	83	44	151	0.059506418	0.116274916	1.157721796	Q3U7T5; A8DUK4; Q3UWC2; Q9QWL7; D3YUE8; Q9D4N6; P08730; A0JLR7; A7YL62; Q9Z2K1; Q3UEK0; Q00898; P27005; Q3ULL0; A0A0N4SUN4; Q3UV17; A0A0R4J135; Q3UYR9; Q80UW0; P16045; Q99KL8; Q922U2; Q91VB8; P50446; Q8BSU1; P31725; P19157; A2ARV4
GO:0048731	system development	biological_process	37	83	60	151	0.065073021	0.127077989	1.12188755	Q8CCS3; A2A513; B2RWS6; Q80VP1; Q64446; Q9QWL7; D3YUE8; Q9D4N6; P08730; Q3TIA9; A0A0A6YWT3; A2ABP5; A7YL62; Q9Z2K1; Q8K173; Q3UEK0; A2ACL2; P27005; Q3ULL0; Q8C7U1; Q3UV17; O55124; Q6ZPG8; P16045; Q8CCC2; G5E8N3; Q9ESY2; Q91VB8; P50446; Q9CVL5; Q8BSU1; F8WH42; P07724; P31725; P19157; O35887; A2ARV4
GO:0030154	cell differentiation	biological_process	33	83	53	151	0.066761906	0.130300287	1.132757445	A2A513; B2RWS6; Q64446; Q9QWL7; D3YUE8; Q9D4N6; A0A0A6YWT3; Q3UN62; A2ABP5; Q9Z2K1; Q8K173; Q3UEK0; A2AUN0; P27005; Q8C7U1; Q62488; Q3UYR9; O55124; Q6ZPG8; P16045; Q8CCC2; A2APZ1; Q9Z211; Q91VB8; P50446; Q9CVL5; Q8BSU1; F8WH42; P31725; P19157; Q14BU0; O35887; A2ARV4
GO:2000112	regulation of cellular macromolecule biosynthetic process	biological_process	16	83	24	151	0.068041869	0.132721203	1.212851406	B2RWS6; Q9QWL7; P70354; Q3V3I1; A0A0A6YWT3; A2ACL2; Q3ULL0; Q62488; F6RX08; G5E8N3; Q80UY3; A0A1B0GSS6; Q8BSU1; F8WH42; P31725; A2ARV4
GO:0031326	regulation of cellular biosynthetic process	biological_process	19	83	29	151	0.068558199	0.133650644	1.191940174	B2RWS6; Q9QWL7; Q9D4N6; P70354; Q3V3I1; A0A0A6YWT3; A7YL62; A2ACL2; Q3ULL0; Q62488; F6RX08; Q8CCC2; G5E8N3; Q80UY3; A0A1B0GSS6; Q8BSU1; F8WH42; P31725; A2ARV4
GO:0006950	response to stress	biological_process	23	83	36	151	0.076302595	0.148661559	1.16231593	B2RWS6; Q3UWC2; Q64446; Q3TIA9; A7YL62; Q9Z2K1; Q8K173; Q3UEK0; Q9CZW2; P27005; F6RX08; P16045; Q99KL8; Q8CCC2; A2AJ14; P50446; Q3UED7; Q3UEH2; Q80XZ4; A0A0R4J293; P31725; P19157; O35887
GO:0009719	response to endogenous stimulus	biological_process	14	83	21	151	0.079673324	0.155048726	1.212851406	B2RWS6; Q64446; Q3TIA9; Q3SXH3; A7YL62; Q8K173; A2ACL2; Q00898; F6RX08; Q99KL8; Q8BSU1; Q3UEH2; P19157; A2ARV4
GO:0051252	regulation of RNA metabolic process	biological_process	14	83	21	151	0.079673324	0.155048726	1.212851406	B2RWS6; P70354; A0JLR7; Q3V3I1; A0A0A6YWT3; Q3ULL0; Q62488; F6RX08; G5E8N3; Q80UY3; A0A1B0GSS6; Q8BSU1; F8WH42; A2ARV4
GO:0005856	cytoskeleton	cellular_component	17	83	26	151	0.08113582	0.157620542	1.18952734	A2A513; Q3U7T5; Q3UWC2; Q9QWL7; P08730; A0JLR7; Q9Z2K1; P27005; Q8C7U1; Q3UV17; F6RX08; O55124; Q922U2; P50446; E9Q7P0; P31725; Q14BU0
GO:0009888	tissue development	biological_process	17	83	26	151	0.08113582	0.157620542	1.18952734	A2A513; B2RWS6; Q64446; Q9QWL7; A0A0A6YWT3; Q9Z2K1; Q8K173; A2ACL2; Q3ULL0; Q3UV17; Q3UYR9; O55124; G5E8N3; P50446; Q9CVL5; F8WH42; A2ARV4
GO:0019219	regulation of nucleobase-containing compound metabolic process	biological_process	17	83	26	151	0.08113582	0.157620542	1.18952734	B2RWS6; Q64446; D3YUE8; Q9D4N6; P70354; A0JLR7; Q3V3I1; A0A0A6YWT3; Q3ULL0; Q62488; F6RX08; G5E8N3; Q80UY3; A0A1B0GSS6; Q8BSU1; F8WH42; A2ARV4
GO:0071495	cellular response to endogenous stimulus	biological_process	9	83	13	151	0.082779269	0.160720166	1.259499537	B2RWS6; Q64446; Q3TIA9; Q3SXH3; Q8K173; A2ACL2; Q8BSU1; P19157; A2ARV4
GO:0002250	adaptive immune response	biological_process	3	83	4	151	0.088297978	0.166053653	1.364457831	Q3U7T5; Q3V3I1; Q8CCC2
GO:0001501	skeletal system development	biological_process	3	83	4	151	0.088297978	0.166053653	1.364457831	B2RWS6; Q64446; Q8K173
GO:0017038	protein import	biological_process	3	83	4	151	0.088297978	0.166053653	1.364457831	B2RWS6; F6RX08; A2ARV4
GO:0030323	respiratory tube development	biological_process	3	83	4	151	0.088297978	0.166053653	1.364457831	B2RWS6; Q64446; F8WH42
GO:0030324	lung development	biological_process	3	83	4	151	0.088297978	0.166053653	1.364457831	B2RWS6; Q64446; F8WH42
GO:0034504	protein localization to nucleus	biological_process	3	83	4	151	0.088297978	0.166053653	1.364457831	B2RWS6; F6RX08; F8WH42
GO:0048511	rhythmic process	biological_process	3	83	4	151	0.088297978	0.166053653	1.364457831	B2RWS6; Q9D4N6; P07724
GO:0060541	respiratory system development	biological_process	3	83	4	151	0.088297978	0.166053653	1.364457831	B2RWS6; Q64446; F8WH42
GO:1900180	regulation of protein localization to nucleus	biological_process	3	83	4	151	0.088297978	0.166053653	1.364457831	B2RWS6; F6RX08; F8WH42
GO:1900182	positive regulation of protein localization to nucleus	biological_process	3	83	4	151	0.088297978	0.166053653	1.364457831	B2RWS6; F6RX08; F8WH42
GO:1903530	regulation of secretion by cell	biological_process	3	83	4	151	0.088297978	0.166053653	1.364457831	B2RWS6; A7YL62; F8WH42
GO:2001252	positive regulation of chromosome organization	biological_process	3	83	4	151	0.088297978	0.166053653	1.364457831	B2RWS6; F6RX08; F8WH42
GO:0006576	cellular biogenic amine metabolic process	biological_process	3	83	4	151	0.088297978	0.166053653	1.364457831	D3YYG4; Q64446; A7YL62
GO:0044106	cellular amine metabolic process	biological_process	3	83	4	151	0.088297978	0.166053653	1.364457831	D3YYG4; Q64446; A7YL62
GO:1901617	organic hydroxy compound biosynthetic process	biological_process	3	83	4	151	0.088297978	0.166053653	1.364457831	D3YYG4; Q64446; A7YL62
GO:0098552	side of membrane	cellular_component	3	83	4	151	0.088297978	0.166053653	1.364457831	Q80VP1; A0A0N4SUN4; A2ARV4
GO:0004601	peroxidase activity	molecular_function	3	83	4	151	0.088297978	0.166053653	1.364457831	A8DUK4; Q91VB8; P19157
GO:0016684	oxidoreductase activity, acting on peroxide as acceptor	molecular_function	3	83	4	151	0.088297978	0.166053653	1.364457831	A8DUK4; Q91VB8; P19157
GO:0044445	cytosolic part	cellular_component	3	83	4	151	0.088297978	0.166053653	1.364457831	A8DUK4; Q9D4N6; Q91VB8
GO:0060326	cell chemotaxis	biological_process	3	83	4	151	0.088297978	0.166053653	1.364457831	Q3UWC2; P27005; P31725
GO:0006140	regulation of nucleotide metabolic process	biological_process	3	83	4	151	0.088297978	0.166053653	1.364457831	Q64446; D3YUE8; Q9D4N6
GO:0006163	purine nucleotide metabolic process	biological_process	3	83	4	151	0.088297978	0.166053653	1.364457831	Q64446; D3YUE8; Q9D4N6
GO:0006753	nucleoside phosphate metabolic process	biological_process	3	83	4	151	0.088297978	0.166053653	1.364457831	Q64446; D3YUE8; Q9D4N6
GO:0009117	nucleotide metabolic process	biological_process	3	83	4	151	0.088297978	0.166053653	1.364457831	Q64446; D3YUE8; Q9D4N6
GO:0009150	purine ribonucleotide metabolic process	biological_process	3	83	4	151	0.088297978	0.166053653	1.364457831	Q64446; D3YUE8; Q9D4N6
GO:0009259	ribonucleotide metabolic process	biological_process	3	83	4	151	0.088297978	0.166053653	1.364457831	Q64446; D3YUE8; Q9D4N6
GO:0019693	ribose phosphate metabolic process	biological_process	3	83	4	151	0.088297978	0.166053653	1.364457831	Q64446; D3YUE8; Q9D4N6
GO:1901605	alpha-amino acid metabolic process	biological_process	3	83	4	151	0.088297978	0.166053653	1.364457831	Q64446; Q3TIA9; Q3UEH2
GO:1903036	positive regulation of response to wounding	biological_process	3	83	4	151	0.088297978	0.166053653	1.364457831	Q64446; P27005; P31725
GO:0007346	regulation of mitotic cell cycle	biological_process	3	83	4	151	0.088297978	0.166053653	1.364457831	Q3TIA9; Q9CZW2; F6RX08
GO:0050878	regulation of body fluid levels	biological_process	3	83	4	151	0.088297978	0.166053653	1.364457831	Q9Z2K1; A0A0R4J293; P31725
GO:0051271	negative regulation of cellular component movement	biological_process	3	83	4	151	0.088297978	0.166053653	1.364457831	Q9Z2K1; Q8K173; F2Z472
GO:2000146	negative regulation of cell motility	biological_process	3	83	4	151	0.088297978	0.166053653	1.364457831	Q9Z2K1; Q8K173; F2Z472
GO:0002696	positive regulation of leukocyte activation	biological_process	3	83	4	151	0.088297978	0.166053653	1.364457831	Q3UEK0; P16045; Q8CCC2
GO:0034112	positive regulation of homotypic cell-cell adhesion	biological_process	3	83	4	151	0.088297978	0.166053653	1.364457831	Q3UEK0; P16045; Q8CCC2
GO:0050867	positive regulation of cell activation	biological_process	3	83	4	151	0.088297978	0.166053653	1.364457831	Q3UEK0; P16045; Q8CCC2
GO:0050870	positive regulation of T cell activation	biological_process	3	83	4	151	0.088297978	0.166053653	1.364457831	Q3UEK0; P16045; Q8CCC2
GO:0051251	positive regulation of lymphocyte activation	biological_process	3	83	4	151	0.088297978	0.166053653	1.364457831	Q3UEK0; P16045; Q8CCC2
GO:1902107	positive regulation of leukocyte differentiation	biological_process	3	83	4	151	0.088297978	0.166053653	1.364457831	Q3UEK0; Q8CCC2; F8WH42
GO:1903039	positive regulation of leukocyte cell-cell adhesion	biological_process	3	83	4	151	0.088297978	0.166053653	1.364457831	Q3UEK0; P16045; Q8CCC2
GO:1903708	positive regulation of hemopoiesis	biological_process	3	83	4	151	0.088297978	0.166053653	1.364457831	Q3UEK0; Q8CCC2; F8WH42
GO:2001242	regulation of intrinsic apoptotic signaling pathway	biological_process	3	83	4	151	0.088297978	0.166053653	1.364457831	Q3UEK0; P27005; P31725
GO:0044770	cell cycle phase transition	biological_process	3	83	4	151	0.088297978	0.166053653	1.364457831	Q9CZW2; A2ACL2; F6RX08
GO:0044772	mitotic cell cycle phase transition	biological_process	3	83	4	151	0.088297978	0.166053653	1.364457831	Q9CZW2; A2ACL2; F6RX08
GO:0016567	protein ubiquitination	biological_process	3	83	4	151	0.088297978	0.166053653	1.364457831	A2ACL2; F6RX08; Q9CVL5
GO:0032446	protein modification by small protein conjugation	biological_process	3	83	4	151	0.088297978	0.166053653	1.364457831	A2ACL2; F6RX08; Q9CVL5
GO:0070647	protein modification by small protein conjugation or removal	biological_process	3	83	4	151	0.088297978	0.166053653	1.364457831	A2ACL2; F6RX08; Q9CVL5
GO:0002791	regulation of peptide secretion	biological_process	3	83	4	151	0.088297978	0.166053653	1.364457831	P27005; F8WH42; P31725
GO:0021782	glial cell development	biological_process	3	83	4	151	0.088297978	0.166053653	1.364457831	P27005; P31725; P19157
GO:0031349	positive regulation of defense response	biological_process	3	83	4	151	0.088297978	0.166053653	1.364457831	P27005; Q8CCC2; P31725
GO:0048708	astrocyte differentiation	biological_process	3	83	4	151	0.088297978	0.166053653	1.364457831	P27005; F8WH42; P31725
GO:0090087	regulation of peptide transport	biological_process	3	83	4	151	0.088297978	0.166053653	1.364457831	P27005; F8WH42; P31725
GO:0006511	ubiquitin-dependent protein catabolic process	biological_process	3	83	4	151	0.088297978	0.166053653	1.364457831	F6RX08; A2AJ14; Q9CVL5
GO:0042742	defense response to bacterium	biological_process	3	83	4	151	0.088297978	0.166053653	1.364457831	Q8CCC2; P50446; Q80XZ4
GO:0098542	defense response to other organism	biological_process	3	83	4	151	0.088297978	0.166053653	1.364457831	Q8CCC2; P50446; Q80XZ4
GO:0010817	regulation of hormone levels	biological_process	3	83	4	151	0.088297978	0.166053653	1.364457831	F8WH42; P07724; A2ARV4
GO:0005509	calcium ion binding	molecular_function	7	83	10	151	0.091524979	0.17097233	1.273493976	Q8CCS3; P27005; Q3UHF8; A2AJ14; P31725; O35887; A2ARV4
GO:0030198	extracellular matrix organization	biological_process	7	83	10	151	0.091524979	0.17097233	1.273493976	A2A513; B2RWS6; Q64446; Q9QWL7; Q8K173; O55124; P50446
GO:0043062	extracellular structure organization	biological_process	7	83	10	151	0.091524979	0.17097233	1.273493976	A2A513; B2RWS6; Q64446; Q9QWL7; Q8K173; O55124; P50446
GO:0001101	response to acid chemical	biological_process	7	83	10	151	0.091524979	0.17097233	1.273493976	B2RWS6; Q64446; P08730; Q3TIA9; Q8K173; Q99KL8; P19157
GO:0001775	cell activation	biological_process	7	83	10	151	0.091524979	0.17097233	1.273493976	B2RWS6; Q64446; A0A0A6YWT3; Q3UEK0; P16045; Q8CCC2; Q9CVL5
GO:0006518	peptide metabolic process	biological_process	7	83	10	151	0.091524979	0.17097233	1.273493976	B2RWS6; Q9QWL7; A2ACL2; F6RX08; Q8BSU1; P31725; P19157
GO:0043604	amide biosynthetic process	biological_process	7	83	10	151	0.091524979	0.17097233	1.273493976	B2RWS6; Q9QWL7; Q3TIA9; A2ACL2; F6RX08; Q8BSU1; P31725
GO:0045321	leukocyte activation	biological_process	7	83	10	151	0.091524979	0.17097233	1.273493976	B2RWS6; Q64446; A0A0A6YWT3; Q3UEK0; P16045; Q8CCC2; Q9CVL5
GO:0046649	lymphocyte activation	biological_process	7	83	10	151	0.091524979	0.17097233	1.273493976	B2RWS6; Q64446; A0A0A6YWT3; Q3UEK0; P16045; Q8CCC2; Q9CVL5
GO:0051129	negative regulation of cellular component organization	biological_process	7	83	10	151	0.091524979	0.17097233	1.273493976	B2RWS6; P70354; A7YL62; F6RX08; P16045; Q9CVL5; F8WH42
GO:0001568	blood vessel development	biological_process	7	83	10	151	0.091524979	0.17097233	1.273493976	Q80VP1; Q64446; A0A0A6YWT3; Q8K173; Q9CVL5; F8WH42; A2ARV4
GO:0001944	vasculature development	biological_process	7	83	10	151	0.091524979	0.17097233	1.273493976	Q80VP1; Q64446; A0A0A6YWT3; Q8K173; Q9CVL5; F8WH42; A2ARV4
GO:0046914	transition metal ion binding	molecular_function	12	83	18	151	0.092821796	0.173298345	1.212851406	B2RWS6; A8DUK4; Q14B74; Q64446; G3UYU0; Q6WIZ7; Q7TPZ8; A2ACL2; P27005; G5E8N3; Q91VB8; P31725
GO:0044271	cellular nitrogen compound biosynthetic process	biological_process	18	83	28	151	0.094495571	0.176325162	1.169535284	B2RWS6; Q9QWL7; Q9D4N6; P70354; Q3V3I1; Q3TIA9; A0A0A6YWT3; A2ACL2; Q3ULL0; Q62488; F6RX08; G5E8N3; Q80UY3; A0A1B0GSS6; Q8BSU1; F8WH42; P31725; A2ARV4
GO:0005102	receptor binding	molecular_function	15	83	23	151	0.095645284	0.178272182	1.186485071	B2RWS6; Q3UWC2; Q9QWL7; A2ABP5; A7YL62; Q8K173; A2AUN0; P27005; Q6ZPG8; Q8CCC2; Q8BQN4; Q8BSU1; F8WH42; P31725; A2ARV4
GO:0019438	aromatic compound biosynthetic process	biological_process	15	83	23	151	0.095645284	0.178272182	1.186485071	B2RWS6; Q64446; Q9D4N6; P70354; Q3V3I1; A0A0A6YWT3; Q3ULL0; Q62488; F6RX08; G5E8N3; Q80UY3; A0A1B0GSS6; Q8BSU1; F8WH42; A2ARV4
GO:0002252	immune effector process	biological_process	5	83	7	151	0.096685065	0.178622463	1.299483649	Q3U7T5; Q64446; A7YL62; P16045; Q8CCC2
GO:0045862	positive regulation of proteolysis	biological_process	5	83	7	151	0.096685065	0.178622463	1.299483649	Q3U7T5; B2RWS6; Q9CZW2; P27005; P31725
GO:0005694	chromosome	cellular_component	5	83	7	151	0.096685065	0.178622463	1.299483649	B2RWS6; Q3ULL0; Q62488; F6RX08; G5E8N3
GO:0016568	chromatin modification	biological_process	5	83	7	151	0.096685065	0.178622463	1.299483649	B2RWS6; P70354; F6RX08; G5E8N3; F8WH42
GO:0032940	secretion by cell	biological_process	5	83	7	151	0.096685065	0.178622463	1.299483649	B2RWS6; A7YL62; F8WH42; O35887; A2ARV4
GO:0048514	blood vessel morphogenesis	biological_process	5	83	7	151	0.096685065	0.178622463	1.299483649	Q80VP1; A0A0A6YWT3; Q8K173; F8WH42; A2ARV4
GO:0002526	acute inflammatory response	biological_process	5	83	7	151	0.096685065	0.178622463	1.299483649	Q3UWC2; A7YL62; Q3UEK0; P27005; P19157
GO:0005578	proteinaceous extracellular matrix	cellular_component	5	83	7	151	0.096685065	0.178622463	1.299483649	Q14B74; Q07563; Q8K173; P16045; Q14BU0
GO:0070489	T cell aggregation	biological_process	5	83	7	151	0.096685065	0.178622463	1.299483649	Q64446; A0A0A6YWT3; Q3UEK0; P16045; Q8CCC2
GO:0071593	lymphocyte aggregation	biological_process	5	83	7	151	0.096685065	0.178622463	1.299483649	Q64446; A0A0A6YWT3; Q3UEK0; P16045; Q8CCC2
GO:0099600	transmembrane receptor activity	molecular_function	5	83	7	151	0.096685065	0.178622463	1.299483649	Q9QWL7; Q8CCC2; Q8BSU1; Q80XZ4; F8VQI7
GO:0000278	mitotic cell cycle	biological_process	5	83	7	151	0.096685065	0.178622463	1.299483649	Q3TIA9; Q9CZW2; A2ACL2; F6RX08; G5E8N3
GO:0034110	regulation of homotypic cell-cell adhesion	biological_process	5	83	7	151	0.096685065	0.178622463	1.299483649	A0A0A6YWT3; Q3UEK0; P16045; Q8CCC2; P19157
GO:1903037	regulation of leukocyte cell-cell adhesion	biological_process	5	83	7	151	0.096685065	0.178622463	1.299483649	A0A0A6YWT3; Q3UEK0; P16045; Q8CCC2; P19157
GO:0031099	regeneration	biological_process	5	83	7	151	0.096685065	0.178622463	1.299483649	A7YL62; F8WH42; P07724; P19157; O35887
GO:0042060	wound healing	biological_process	5	83	7	151	0.096685065	0.178622463	1.299483649	Q8K173; P27005; P50446; A0A0R4J293; P31725
GO:0007165	signal transduction	biological_process	29	83	47	151	0.097277662	0.179618358	1.122532684	Q3U7T5; B2RWS6; Q80VP1; Q64446; Q9QWL7; Q9D4N6; Q3V3I1; A0A0A6YWT3; Q8K173; Q3UEK0; Q9CZW2; A2ACL2; A2AUN0; P27005; Q3ULL0; F6RX08; P16045; Q8CCC2; A2APZ1; Q9Z211; P50446; Q8BSU1; F8WH42; P07724; Q80XZ4; P31725; P19157; F8VQI7; A2ARV4
GO:0051716	cellular response to stimulus	biological_process	38	83	63	151	0.099379693	0.183398718	1.097341748	A2A513; Q3U7T5; B2RWS6; Q80VP1; Q3UWC2; Q64446; Q9QWL7; Q9D4N6; P08730; Q3V3I1; Q3TIA9; A0A0A6YWT3; Q3SXH3; Q8K173; Q3UEK0; Q9CZW2; A2ACL2; A2AUN0; P27005; Q3ULL0; F6RX08; P16045; Q99KL8; Q8CCC2; A2APZ1; Q9Z211; A2AJ14; P50446; Q8BSU1; Q3UED7; F8WH42; P07724; Q80XZ4; P31725; P19157; F8VQI7; O35887; A2ARV4
GO:0065010	extracellular membrane-bounded organelle	cellular_component	26	83	42	151	0.105941621	0.195293483	1.126219162	Q3U7T5; Q3UWC2; Q9QWL7; D3YUE8; Q9D4N6; P08730; A0JLR7; A7YL62; Q9Z2K1; Q3UEK0; Q00898; P27005; Q3ULL0; A0A0N4SUN4; Q3UV17; A0A0R4J135; Q3UYR9; Q80UW0; P16045; Q99KL8; Q922U2; P50446; Q8BSU1; P31725; P19157; A2ARV4
GO:0034641	cellular nitrogen compound metabolic process	biological_process	26	83	42	151	0.105941621	0.195293483	1.126219162	B2RWS6; D3YYG4; Q64446; Q9QWL7; D3YUE8; Q9D4N6; P70354; A0JLR7; Q3V3I1; Q3TIA9; A0A0A6YWT3; A7YL62; Q3UEK0; A2ACL2; Q3ULL0; Q62488; F6RX08; Q8BQN4; G5E8N3; Q80UY3; A0A1B0GSS6; Q8BSU1; F8WH42; P31725; P19157; A2ARV4
GO:0099512	supramolecular fiber	cellular_component	10	83	15	151	0.107576802	0.197547985	1.212851406	A2A513; Q3UWC2; Q9QWL7; P08730; A0JLR7; Q9Z2K1; Q3UV17; O55124; Q922U2; P50446
GO:0051247	positive regulation of protein metabolic process	biological_process	10	83	15	151	0.107576802	0.197547985	1.212851406	Q3U7T5; B2RWS6; Q9QWL7; A7YL62; Q9CZW2; P27005; Q8CCC2; Q8BSU1; F8WH42; P31725
GO:0002520	immune system development	biological_process	10	83	15	151	0.107576802	0.197547985	1.212851406	B2RWS6; Q64446; D3YUE8; A0A0A6YWT3; Q3UEK0; P16045; Q8CCC2; Q91VB8; Q9CVL5; F8WH42
GO:0009790	embryo development	biological_process	10	83	15	151	0.107576802	0.197547985	1.212851406	B2RWS6; Q80VP1; A0A0A6YWT3; A2ACL2; Q3UYR9; G5E8N3; Q91VB8; Q9CVL5; F8WH42; A2ARV4
GO:0030097	hemopoiesis	biological_process	10	83	15	151	0.107576802	0.197547985	1.212851406	B2RWS6; Q64446; D3YUE8; A0A0A6YWT3; Q3UEK0; P16045; Q8CCC2; Q91VB8; Q9CVL5; F8WH42
GO:0048534	hematopoietic or lymphoid organ development	biological_process	10	83	15	151	0.107576802	0.197547985	1.212851406	B2RWS6; Q64446; D3YUE8; A0A0A6YWT3; Q3UEK0; P16045; Q8CCC2; Q91VB8; Q9CVL5; F8WH42
GO:1901698	response to nitrogen compound	biological_process	10	83	15	151	0.107576802	0.197547985	1.212851406	B2RWS6; Q64446; Q3TIA9; Q8K173; A2ACL2; Q00898; Q99KL8; A2AJ14; Q8BSU1; P19157
GO:0032501	multicellular organismal process	biological_process	45	83	76	151	0.111432978	0.204517309	1.077203551	Q8CCS3; A2A513; B2RWS6; Q80VP1; Q64446; Q9QWL7; D3YUE8; Q9D4N6; P08730; P70354; Q3TIA9; A0A0A6YWT3; Q3UN62; A2ABP5; A7YL62; Q9Z2K1; Q8K173; Q3UEK0; A2ACL2; P27005; Q3ULL0; Q8C7U1; Q3UV17; Q62488; Q3UYR9; O55124; Q6ZPG8; P16045; Q8CCC2; G5E8N3; Q9ESY2; Q91VB8; P50446; Q9CVL5; Q8BSU1; F8WH42; F2Z472; P07724; A0A0R4J293; P31725; P19157; Q14BU0; F8VQI7; O35887; A2ARV4
GO:0006351	transcription, DNA-templated	biological_process	13	83	20	151	0.112404189	0.205624893	1.18253012	B2RWS6; P70354; Q3V3I1; A0A0A6YWT3; Q3ULL0; Q62488; F6RX08; G5E8N3; Q80UY3; A0A1B0GSS6; Q8BSU1; F8WH42; A2ARV4
GO:0006355	regulation of transcription, DNA-templated	biological_process	13	83	20	151	0.112404189	0.205624893	1.18253012	B2RWS6; P70354; Q3V3I1; A0A0A6YWT3; Q3ULL0; Q62488; F6RX08; G5E8N3; Q80UY3; A0A1B0GSS6; Q8BSU1; F8WH42; A2ARV4
GO:0032774	RNA biosynthetic process	biological_process	13	83	20	151	0.112404189	0.205624893	1.18253012	B2RWS6; P70354; Q3V3I1; A0A0A6YWT3; Q3ULL0; Q62488; F6RX08; G5E8N3; Q80UY3; A0A1B0GSS6; Q8BSU1; F8WH42; A2ARV4
GO:0097659	nucleic acid-templated transcription	biological_process	13	83	20	151	0.112404189	0.205624893	1.18253012	B2RWS6; P70354; Q3V3I1; A0A0A6YWT3; Q3ULL0; Q62488; F6RX08; G5E8N3; Q80UY3; A0A1B0GSS6; Q8BSU1; F8WH42; A2ARV4
GO:1903506	regulation of nucleic acid-templated transcription	biological_process	13	83	20	151	0.112404189	0.205624893	1.18253012	B2RWS6; P70354; Q3V3I1; A0A0A6YWT3; Q3ULL0; Q62488; F6RX08; G5E8N3; Q80UY3; A0A1B0GSS6; Q8BSU1; F8WH42; A2ARV4
GO:2001141	regulation of RNA biosynthetic process	biological_process	13	83	20	151	0.112404189	0.205624893	1.18253012	B2RWS6; P70354; Q3V3I1; A0A0A6YWT3; Q3ULL0; Q62488; F6RX08; G5E8N3; Q80UY3; A0A1B0GSS6; Q8BSU1; F8WH42; A2ARV4
GO:0009653	anatomical structure morphogenesis	biological_process	20	83	32	151	0.121622309	0.22224556	1.137048193	B2RWS6; Q80VP1; Q64446; Q9QWL7; Q9D4N6; P08730; A0A0A6YWT3; Q9Z2K1; Q8K173; A2ACL2; Q3ULL0; Q8C7U1; Q3UYR9; O55124; Q6ZPG8; G5E8N3; P50446; Q9CVL5; F8WH42; A2ARV4
GO:0034645	cellular macromolecule biosynthetic process	biological_process	20	83	32	151	0.121622309	0.22224556	1.137048193	B2RWS6; Q64446; Q9QWL7; P70354; Q3V3I1; A0A0A6YWT3; A2ACL2; Q3ULL0; Q62488; F6RX08; Q3UYR9; Q80UW0; G5E8N3; Q80UY3; A0A1B0GSS6; A2AJ14; Q8BSU1; F8WH42; P31725; A2ARV4
GO:0010038	response to metal ion	biological_process	8	83	12	151	0.123905102	0.225068552	1.212851406	A2A513; B2RWS6; Q64446; Q9D4N6; P27005; Q99KL8; Q3UEH2; P31725
GO:0099513	polymeric cytoskeletal fiber	cellular_component	8	83	12	151	0.123905102	0.225068552	1.212851406	A2A513; Q3UWC2; Q9QWL7; P08730; Q9Z2K1; Q3UV17; Q922U2; P50446
GO:0009628	response to abiotic stimulus	biological_process	8	83	12	151	0.123905102	0.225068552	1.212851406	B2RWS6; P08730; Q3TIA9; Q8K173; F6RX08; Q99KL8; Q8CCC2; A2ARV4
GO:0009891	positive regulation of biosynthetic process	biological_process	8	83	12	151	0.123905102	0.225068552	1.212851406	B2RWS6; Q9QWL7; Q9D4N6; Q3V3I1; A7YL62; Q3ULL0; Q8CCC2; F8WH42
GO:0031328	positive regulation of cellular biosynthetic process	biological_process	8	83	12	151	0.123905102	0.225068552	1.212851406	B2RWS6; Q9QWL7; Q9D4N6; Q3V3I1; A7YL62; Q3ULL0; Q8CCC2; F8WH42
GO:0032403	protein complex binding	molecular_function	8	83	12	151	0.123905102	0.225068552	1.212851406	B2RWS6; Q3V3I1; Q8K173; P27005; F6RX08; O55124; A2APZ1; P31725
GO:0044711	single-organism biosynthetic process	biological_process	8	83	12	151	0.123905102	0.225068552	1.212851406	B2RWS6; D3YYG4; D3YUE8; Q9D4N6; Q3TIA9; A7YL62; Q3UYR9; Q80UW0
GO:0006954	inflammatory response	biological_process	8	83	12	151	0.123905102	0.225068552	1.212851406	Q3UWC2; A7YL62; Q9Z2K1; Q3UEK0; P27005; Q8CCC2; P31725; P19157
GO:0016337	single organismal cell-cell adhesion	biological_process	8	83	12	151	0.123905102	0.225068552	1.212851406	Q64446; A0A0A6YWT3; Q3UEK0; P27005; P16045; Q8CCC2; P31725; P19157
GO:0031410	cytoplasmic vesicle	cellular_component	8	83	12	151	0.123905102	0.225068552	1.212851406	Q64446; Q3UN62; A0A0N4SUN4; Q8CCC2; A2APZ1; F2Z472; O35887; A2ARV4
GO:0098602	single organism cell adhesion	biological_process	8	83	12	151	0.123905102	0.225068552	1.212851406	Q64446; A0A0A6YWT3; Q3UEK0; P27005; P16045; Q8CCC2; P31725; P19157
GO:0005829	cytosol	cellular_component	24	83	39	151	0.125911764	0.22858981	1.119555144	B2RWS6; Q80VP1; A8DUK4; Q3UWC2; Q64446; D3YUE8; Q9D4N6; A0JLR7; G3UYU0; Q3V3I1; Q3TIA9; A7YL62; Q9CZW2; P27005; A0A0N4SUN4; A0A0R4J135; P16045; Q99KL8; G5E8N3; Q91VB8; F8WH42; P07724; P31725; P19157
GO:0009058	biosynthetic process	biological_process	28	83	46	151	0.126388685	0.229331551	1.107386066	B2RWS6; D3YYG4; Q64446; Q9QWL7; D3YUE8; Q9D4N6; P70354; Q3V3I1; Q3TIA9; A0A0A6YWT3; A7YL62; A2ACL2; Q3ULL0; Q62488; F6RX08; Q3UYR9; Q80UW0; Q8CCC2; G5E8N3; Q80UY3; A0A1B0GSS6; A2AJ14; Q8BSU1; F8WH42; Q3UEH2; P31725; P19157; A2ARV4
GO:0060429	epithelium development	biological_process	14	83	22	151	0.131790932	0.238803777	1.157721796	A2A513; B2RWS6; Q64446; Q9QWL7; A0A0A6YWT3; Q9Z2K1; A2ACL2; Q3ULL0; Q3UV17; G5E8N3; P50446; Q9CVL5; F8WH42; A2ARV4
GO:0034654	nucleobase-containing compound biosynthetic process	biological_process	14	83	22	151	0.131790932	0.238803777	1.157721796	B2RWS6; Q9D4N6; P70354; Q3V3I1; A0A0A6YWT3; Q3ULL0; Q62488; F6RX08; G5E8N3; Q80UY3; A0A1B0GSS6; Q8BSU1; F8WH42; A2ARV4
GO:0006952	defense response	biological_process	11	83	17	151	0.131822532	0.238803777	1.177179305	Q3UWC2; A7YL62; Q9Z2K1; Q3UEK0; P27005; Q8CCC2; P50446; Q3UED7; Q80XZ4; P31725; P19157
GO:0044249	cellular biosynthetic process	biological_process	25	83	41	151	0.137720275	0.249353223	1.10931531	B2RWS6; D3YYG4; Q64446; Q9QWL7; Q9D4N6; P70354; Q3V3I1; Q3TIA9; A0A0A6YWT3; A7YL62; A2ACL2; Q3ULL0; Q62488; F6RX08; Q3UYR9; Q80UW0; Q8CCC2; G5E8N3; Q80UY3; A0A1B0GSS6; A2AJ14; Q8BSU1; F8WH42; P31725; A2ARV4
GO:0006979	response to oxidative stress	biological_process	6	83	9	151	0.141363858	0.255261433	1.212851406	B2RWS6; Q64446; Q3UEK0; Q99KL8; Q3UEH2; P19157
GO:0009314	response to radiation	biological_process	6	83	9	151	0.141363858	0.255261433	1.212851406	B2RWS6; P08730; Q3TIA9; Q8K173; Q8CCC2; A2ARV4
GO:1901699	cellular response to nitrogen compound	biological_process	6	83	9	151	0.141363858	0.255261433	1.212851406	B2RWS6; Q64446; Q8K173; A2ACL2; Q8BSU1; P19157
GO:0004872	receptor activity	molecular_function	6	83	9	151	0.141363858	0.255261433	1.212851406	Q9QWL7; Q8CCC2; Q8BSU1; Q80XZ4; F8VQI7; A2ARV4
GO:0038023	signaling receptor activity	molecular_function	6	83	9	151	0.141363858	0.255261433	1.212851406	Q9QWL7; Q8CCC2; Q8BSU1; Q80XZ4; F8VQI7; A2ARV4
GO:0023052	signaling	biological_process	30	83	50	151	0.147169329	0.264755303	1.091566265	Q8CCS3; Q3U7T5; B2RWS6; Q80VP1; Q64446; Q9QWL7; Q9D4N6; Q3V3I1; A0A0A6YWT3; Q8K173; Q3UEK0; Q9CZW2; A2ACL2; A2AUN0; P27005; Q3ULL0; F6RX08; P16045; Q8CCC2; A2APZ1; Q9Z211; P50446; Q8BSU1; F8WH42; P07724; Q80XZ4; P31725; P19157; F8VQI7; A2ARV4
GO:0044700	single organism signaling	biological_process	30	83	50	151	0.147169329	0.264755303	1.091566265	Q8CCS3; Q3U7T5; B2RWS6; Q80VP1; Q64446; Q9QWL7; Q9D4N6; Q3V3I1; A0A0A6YWT3; Q8K173; Q3UEK0; Q9CZW2; A2ACL2; A2AUN0; P27005; Q3ULL0; F6RX08; P16045; Q8CCC2; A2APZ1; Q9Z211; P50446; Q8BSU1; F8WH42; P07724; Q80XZ4; P31725; P19157; F8VQI7; A2ARV4
GO:0070887	cellular response to chemical stimulus	biological_process	22	83	36	151	0.148869209	0.264755303	1.111780455	A2A513; B2RWS6; Q3UWC2; Q64446; Q9D4N6; P08730; Q3TIA9; Q3SXH3; Q8K173; Q3UEK0; A2ACL2; P27005; F6RX08; P16045; Q99KL8; Q8CCC2; Q8BSU1; Q3UED7; Q80XZ4; P31725; P19157; A2ARV4
GO:1901360	organic cyclic compound metabolic process	biological_process	22	83	36	151	0.148869209	0.264755303	1.111780455	B2RWS6; Q3UWC2; Q64446; D3YUE8; Q9D4N6; P70354; A0JLR7; Q3V3I1; A0A0A6YWT3; A7YL62; A2ACL2; Q3ULL0; Q62488; F6RX08; G5E8N3; Q80UY3; A0A1B0GSS6; Q8BSU1; F8WH42; Q3UEH2; P07724; A2ARV4
GO:0005515	protein binding	molecular_function	51	83	88	151	0.149651483	0.264755303	1.054353779	Q8CCS3; A2A513; Q3U7T5; B2RWS6; Q9D727; Q80VP1; A8DUK4; Q3UWC2; Q64446; Q9QWL7; Q9D4N6; P08730; P70354; A0JLR7; Q3V3I1; Q07563; Q3TIA9; A2ABP5; A7YL62; Q9Z2K1; Q8K173; Q9CZW2; A2ACL2; Q00898; A2AUN0; P27005; Q3ULL0; Q8C7U1; A0A0N4SUN4; Q62488; F6RX08; Q3UYR9; O55124; Q6ZPG8; P16045; Q99KL8; Q8CCC2; Q8BQN4; Q922U2; A2APZ1; Q9Z211; Q91VB8; Q9CVL5; Q8BSU1; F8WH42; Q80XZ4; E9Q7P0; P31725; P19157; O35…
GO:0016070	RNA metabolic process	biological_process	15	83	24	151	0.150852114	0.264755303	1.137048193	B2RWS6; P70354; A0JLR7; Q3V3I1; A0A0A6YWT3; A2ACL2; Q3ULL0; Q62488; F6RX08; G5E8N3; Q80UY3; A0A1B0GSS6; Q8BSU1; F8WH42; A2ARV4
GO:0035556	intracellular signal transduction	biological_process	15	83	24	151	0.150852114	0.264755303	1.137048193	B2RWS6; Q9D4N6; Q8K173; Q3UEK0; Q9CZW2; A2AUN0; P27005; F6RX08; P16045; Q8CCC2; A2APZ1; Q8BSU1; F8WH42; P31725; P19157
GO:1901362	organic cyclic compound biosynthetic process	biological_process	15	83	24	151	0.150852114	0.264755303	1.137048193	B2RWS6; Q64446; Q9D4N6; P70354; Q3V3I1; A0A0A6YWT3; Q3ULL0; Q62488; F6RX08; G5E8N3; Q80UY3; A0A1B0GSS6; Q8BSU1; F8WH42; A2ARV4
GO:0098609	cell-cell adhesion	biological_process	9	83	14	151	0.154451463	0.264755303	1.169535284	Q8CCS3; Q64446; A0A0A6YWT3; Q3UEK0; P27005; P16045; Q8CCC2; P31725; P19157
GO:0007010	cytoskeleton organization	biological_process	9	83	14	151	0.154451463	0.264755303	1.169535284	A2A513; B2RWS6; Q9QWL7; P08730; Q9Z2K1; F6RX08; O55124; P50446; P31725
GO:0032270	positive regulation of cellular protein metabolic process	biological_process	9	83	14	151	0.154451463	0.264755303	1.169535284	Q3U7T5; B2RWS6; Q9QWL7; Q9CZW2; P27005; Q8CCC2; Q8BSU1; F8WH42; P31725
GO:0043085	positive regulation of catalytic activity	biological_process	9	83	14	151	0.154451463	0.264755303	1.169535284	Q3U7T5; Q64446; Q9D4N6; A7YL62; Q9CZW2; P27005; Q8CCC2; Q8BSU1; P31725
GO:0035295	tube development	biological_process	9	83	14	151	0.154451463	0.264755303	1.169535284	B2RWS6; Q64446; A0A0A6YWT3; Q8K173; A2ACL2; G5E8N3; Q9CVL5; F8WH42; A2ARV4
GO:0048870	cell motility	biological_process	9	83	14	151	0.154451463	0.264755303	1.169535284	Q3UWC2; Q64446; Q9Z2K1; Q8K173; P27005; Q8CCC2; F2Z472; A0A0R4J0G1; P31725
GO:0051674	localization of cell	biological_process	9	83	14	151	0.154451463	0.264755303	1.169535284	Q3UWC2; Q64446; Q9Z2K1; Q8K173; P27005; Q8CCC2; F2Z472; A0A0R4J0G1; P31725
GO:0044430	cytoskeletal part	cellular_component	12	83	19	151	0.155281622	0.264755303	1.149017121	A2A513; Q3U7T5; Q3UWC2; Q9QWL7; P08730; Q9Z2K1; Q3UV17; F6RX08; O55124; Q922U2; P50446; E9Q7P0
GO:0006955	immune response	biological_process	12	83	19	151	0.155281622	0.264755303	1.149017121	Q3U7T5; Q64446; Q3V3I1; A7YL62; Q9Z2K1; Q8K173; Q3UEK0; P27005; P16045; Q8CCC2; F8WH42; P31725
GO:0007154	cell communication	biological_process	31	83	52	151	0.157648207	0.264755303	1.084569045	Q8CCS3; Q3U7T5; B2RWS6; Q80VP1; Q64446; Q9QWL7; Q9D4N6; Q3V3I1; Q3TIA9; A0A0A6YWT3; Q8K173; Q3UEK0; Q9CZW2; A2ACL2; A2AUN0; P27005; Q3ULL0; F6RX08; P16045; Q8CCC2; A2APZ1; Q9Z211; P50446; Q8BSU1; F8WH42; P07724; Q80XZ4; P31725; P19157; F8VQI7; A2ARV4
GO:0051345	positive regulation of hydrolase activity	biological_process	4	83	6	151	0.157958838	0.264755303	1.212851406	Q3U7T5; Q9CZW2; P27005; P31725
GO:0001934	positive regulation of protein phosphorylation	biological_process	4	83	6	151	0.157958838	0.264755303	1.212851406	B2RWS6; Q8CCC2; Q8BSU1; F8WH42
GO:0016569	covalent chromatin modification	biological_process	4	83	6	151	0.157958838	0.264755303	1.212851406	B2RWS6; P70354; G5E8N3; F8WH42
GO:0032870	cellular response to hormone stimulus	biological_process	4	83	6	151	0.157958838	0.264755303	1.212851406	B2RWS6; Q3TIA9; Q3SXH3; P19157
GO:0040008	regulation of growth	biological_process	4	83	6	151	0.157958838	0.264755303	1.212851406	B2RWS6; Q9QWL7; Q8CCC2; P50446
GO:0042327	positive regulation of phosphorylation	biological_process	4	83	6	151	0.157958838	0.264755303	1.212851406	B2RWS6; Q8CCC2; Q8BSU1; F8WH42
GO:0042493	response to drug	biological_process	4	83	6	151	0.157958838	0.264755303	1.212851406	B2RWS6; Q9D4N6; A7YL62; P16045
GO:0043627	response to estrogen	biological_process	4	83	6	151	0.157958838	0.264755303	1.212851406	B2RWS6; A7YL62; Q99KL8; P19157
GO:0043900	regulation of multi-organism process	biological_process	4	83	6	151	0.157958838	0.264755303	1.212851406	B2RWS6; P16045; Q8CCC2; P50446
GO:0043903	regulation of symbiosis, encompassing mutualism through parasitism	biological_process	4	83	6	151	0.157958838	0.264755303	1.212851406	B2RWS6; P16045; Q8CCC2; P50446
GO:0060537	muscle tissue development	biological_process	4	83	6	151	0.157958838	0.264755303	1.212851406	B2RWS6; Q8K173; O55124; A2ARV4
GO:0097193	intrinsic apoptotic signaling pathway	biological_process	4	83	6	151	0.157958838	0.264755303	1.212851406	B2RWS6; Q3UEK0; P27005; P31725
GO:1903827	regulation of cellular protein localization	biological_process	4	83	6	151	0.157958838	0.264755303	1.212851406	B2RWS6; F6RX08; Q9CVL5; F8WH42
GO:0044283	small molecule biosynthetic process	biological_process	4	83	6	151	0.157958838	0.264755303	1.212851406	D3YYG4; D3YUE8; Q3TIA9; A7YL62
GO:0072562	blood microparticle	cellular_component	4	83	6	151	0.157958838	0.264755303	1.212851406	A8DUK4; A7YL62; Q91VB8; A0A0R4J293
GO:0016462	pyrophosphatase activity	molecular_function	4	83	6	151	0.157958838	0.264755303	1.212851406	Q64446; A2APZ1; Q3UED7; E9Q7P0
GO:0016817	hydrolase activity, acting on acid anhydrides	molecular_function	4	83	6	151	0.157958838	0.264755303	1.212851406	Q64446; A2APZ1; Q3UED7; E9Q7P0
GO:0016818	hydrolase activity, acting on acid anhydrides, in phosphorus-containing anhydrides	molecular_function	4	83	6	151	0.157958838	0.264755303	1.212851406	Q64446; A2APZ1; Q3UED7; E9Q7P0
GO:0017111	nucleoside-triphosphatase activity	molecular_function	4	83	6	151	0.157958838	0.264755303	1.212851406	Q64446; A2APZ1; Q3UED7; E9Q7P0
GO:0030217	T cell differentiation	biological_process	4	83	6	151	0.157958838	0.264755303	1.212851406	Q64446; A0A0A6YWT3; Q3UEK0; Q8CCC2
GO:0032409	regulation of transporter activity	biological_process	4	83	6	151	0.157958838	0.264755303	1.212851406	Q64446; A0JLR7; A7YL62; Q8BSU1
GO:2000145	regulation of cell motility	biological_process	4	83	6	151	0.157958838	0.264755303	1.212851406	Q64446; Q9Z2K1; Q8K173; F2Z472
GO:0031400	negative regulation of protein modification process	biological_process	4	83	6	151	0.157958838	0.264755303	1.212851406	P70354; F6RX08; F8WH42; P19157
GO:0045785	positive regulation of cell adhesion	biological_process	4	83	6	151	0.157958838	0.264755303	1.212851406	Q3V3I1; Q3UEK0; P16045; Q8CCC2
GO:0002694	regulation of leukocyte activation	biological_process	4	83	6	151	0.157958838	0.264755303	1.212851406	A0A0A6YWT3; Q3UEK0; P16045; Q8CCC2
GO:0050863	regulation of T cell activation	biological_process	4	83	6	151	0.157958838	0.264755303	1.212851406	A0A0A6YWT3; Q3UEK0; P16045; Q8CCC2
GO:0050865	regulation of cell activation	biological_process	4	83	6	151	0.157958838	0.264755303	1.212851406	A0A0A6YWT3; Q3UEK0; P16045; Q8CCC2
GO:0051249	regulation of lymphocyte activation	biological_process	4	83	6	151	0.157958838	0.264755303	1.212851406	A0A0A6YWT3; Q3UEK0; P16045; Q8CCC2
GO:1902105	regulation of leukocyte differentiation	biological_process	4	83	6	151	0.157958838	0.264755303	1.212851406	A0A0A6YWT3; Q3UEK0; Q8CCC2; F8WH42
GO:1903706	regulation of hemopoiesis	biological_process	4	83	6	151	0.157958838	0.264755303	1.212851406	A0A0A6YWT3; Q3UEK0; Q8CCC2; F8WH42
GO:0019953	sexual reproduction	biological_process	4	83	6	151	0.157958838	0.264755303	1.212851406	Q3UN62; Q62488; F2Z472; P07724
GO:0040013	negative regulation of locomotion	biological_process	4	83	6	151	0.157958838	0.264755303	1.212851406	Q9Z2K1; Q8K173; Q8BSU1; F2Z472
GO:1903047	mitotic cell cycle process	biological_process	4	83	6	151	0.157958838	0.264755303	1.212851406	Q9CZW2; A2ACL2; F6RX08; G5E8N3
GO:0044433	cytoplasmic vesicle part	cellular_component	4	83	6	151	0.157958838	0.264755303	1.212851406	A0A0N4SUN4; Q8CCC2; A2APZ1; A2ARV4
GO:0000165	MAPK cascade	biological_process	4	83	6	151	0.157958838	0.264755303	1.212851406	F6RX08; Q8BSU1; F8WH42; P19157
GO:0048608	reproductive structure development	biological_process	4	83	6	151	0.157958838	0.264755303	1.212851406	Q9CVL5; F8WH42; P07724; A2ARV4
GO:0061458	reproductive system development	biological_process	4	83	6	151	0.157958838	0.264755303	1.212851406	Q9CVL5; F8WH42; P07724; A2ARV4
GO:1901576	organic substance biosynthetic process	biological_process	27	83	45	151	0.161425469	0.264755303	1.091566265	B2RWS6; D3YYG4; Q64446; Q9QWL7; D3YUE8; Q9D4N6; P70354; Q3V3I1; Q3TIA9; A0A0A6YWT3; A7YL62; A2ACL2; Q3ULL0; Q62488; F6RX08; Q3UYR9; Q80UW0; Q8CCC2; G5E8N3; Q80UY3; A0A1B0GSS6; A2AJ14; Q8BSU1; F8WH42; P31725; P19157; A2ARV4
GO:0001906	cell killing	biological_process	2	83	3	151	0.16335126	0.264755303	1.212851406	Q3U7T5; Q8CCC2
GO:0004175	endopeptidase activity	molecular_function	2	83	3	151	0.16335126	0.264755303	1.212851406	Q3U7T5; Q14B74
GO:0019902	phosphatase binding	molecular_function	2	83	3	151	0.16335126	0.264755303	1.212851406	Q3U7T5; Q3V3I1
GO:0061134	peptidase regulator activity	molecular_function	2	83	3	151	0.16335126	0.264755303	1.212851406	Q3U7T5; Q00898
GO:0000785	chromatin	cellular_component	2	83	3	151	0.16335126	0.264755303	1.212851406	B2RWS6; Q62488
GO:0001558	regulation of cell growth	biological_process	2	83	3	151	0.16335126	0.264755303	1.212851406	B2RWS6; Q9QWL7
GO:0003012	muscle system process	biological_process	2	83	3	151	0.16335126	0.264755303	1.212851406	B2RWS6; O55124
GO:0006606	protein import into nucleus	biological_process	2	83	3	151	0.16335126	0.264755303	1.212851406	B2RWS6; F6RX08
GO:0006913	nucleocytoplasmic transport	biological_process	2	83	3	151	0.16335126	0.264755303	1.212851406	B2RWS6; F6RX08
GO:0007519	skeletal muscle tissue development	biological_process	2	83	3	151	0.16335126	0.264755303	1.212851406	B2RWS6; O55124
GO:0007613	memory	biological_process	2	83	3	151	0.16335126	0.264755303	1.212851406	B2RWS6; Q9D4N6
GO:0007623	circadian rhythm	biological_process	2	83	3	151	0.16335126	0.264755303	1.212851406	B2RWS6; Q9D4N6
GO:0008361	regulation of cell size	biological_process	2	83	3	151	0.16335126	0.264755303	1.212851406	B2RWS6; Q64446
GO:0009306	protein secretion	biological_process	2	83	3	151	0.16335126	0.264755303	1.212851406	B2RWS6; A7YL62
GO:0010586	miRNA metabolic process	biological_process	2	83	3	151	0.16335126	0.264755303	1.212851406	B2RWS6; A2ACL2
GO:0030183	B cell differentiation	biological_process	2	83	3	151	0.16335126	0.264755303	1.212851406	B2RWS6; P16045
GO:0030307	positive regulation of cell growth	biological_process	2	83	3	151	0.16335126	0.264755303	1.212851406	B2RWS6; Q9QWL7
GO:0031032	actomyosin structure organization	biological_process	2	83	3	151	0.16335126	0.264755303	1.212851406	B2RWS6; O55124
GO:0034976	response to endoplasmic reticulum stress	biological_process	2	83	3	151	0.16335126	0.264755303	1.212851406	B2RWS6; A2AJ14
GO:0040029	regulation of gene expression, epigenetic	biological_process	2	83	3	151	0.16335126	0.264755303	1.212851406	B2RWS6; A2ACL2
GO:0042306	regulation of protein import into nucleus	biological_process	2	83	3	151	0.16335126	0.264755303	1.212851406	B2RWS6; F6RX08
GO:0042307	positive regulation of protein import into nucleus	biological_process	2	83	3	151	0.16335126	0.264755303	1.212851406	B2RWS6; F6RX08
GO:0043565	sequence-specific DNA binding	molecular_function	2	83	3	151	0.16335126	0.264755303	1.212851406	B2RWS6; P70354
GO:0043902	positive regulation of multi-organism process	biological_process	2	83	3	151	0.16335126	0.264755303	1.212851406	B2RWS6; P16045
GO:0044744	protein targeting to nucleus	biological_process	2	83	3	151	0.16335126	0.264755303	1.212851406	B2RWS6; F6RX08
GO:0045444	fat cell differentiation	biological_process	2	83	3	151	0.16335126	0.264755303	1.212851406	B2RWS6; Q9Z211
GO:0045927	positive regulation of growth	biological_process	2	83	3	151	0.16335126	0.264755303	1.212851406	B2RWS6; Q9QWL7
GO:0046822	regulation of nucleocytoplasmic transport	biological_process	2	83	3	151	0.16335126	0.264755303	1.212851406	B2RWS6; F6RX08
GO:0046824	positive regulation of nucleocytoplasmic transport	biological_process	2	83	3	151	0.16335126	0.264755303	1.212851406	B2RWS6; F6RX08
GO:0048524	positive regulation of viral process	biological_process	2	83	3	151	0.16335126	0.264755303	1.212851406	B2RWS6; P16045
GO:0050708	regulation of protein secretion	biological_process	2	83	3	151	0.16335126	0.264755303	1.212851406	B2RWS6; A7YL62
GO:0051019	mitogen-activated protein kinase binding	molecular_function	2	83	3	151	0.16335126	0.264755303	1.212851406	B2RWS6; F6RX08
GO:0051169	nuclear transport	biological_process	2	83	3	151	0.16335126	0.264755303	1.212851406	B2RWS6; F6RX08
GO:0051170	nuclear import	biological_process	2	83	3	151	0.16335126	0.264755303	1.212851406	B2RWS6; F6RX08
GO:0051216	cartilage development	biological_process	2	83	3	151	0.16335126	0.264755303	1.212851406	B2RWS6; Q64446
GO:0055002	striated muscle cell development	biological_process	2	83	3	151	0.16335126	0.264755303	1.212851406	B2RWS6; O55124
GO:0060538	skeletal muscle organ development	biological_process	2	83	3	151	0.16335126	0.264755303	1.212851406	B2RWS6; O55124
GO:0061448	connective tissue development	biological_process	2	83	3	151	0.16335126	0.264755303	1.212851406	B2RWS6; Q64446
GO:0072594	establishment of protein localization to organelle	biological_process	2	83	3	151	0.16335126	0.264755303	1.212851406	B2RWS6; F6RX08
GO:1902593	single-organism nuclear import	biological_process	2	83	3	151	0.16335126	0.264755303	1.212851406	B2RWS6; F6RX08
GO:1903533	regulation of protein targeting	biological_process	2	83	3	151	0.16335126	0.264755303	1.212851406	B2RWS6; F6RX08
GO:1903902	positive regulation of viral life cycle	biological_process	2	83	3	151	0.16335126	0.264755303	1.212851406	B2RWS6; P16045
GO:1904589	regulation of protein import	biological_process	2	83	3	151	0.16335126	0.264755303	1.212851406	B2RWS6; F6RX08
GO:1904591	positive regulation of protein import	biological_process	2	83	3	151	0.16335126	0.264755303	1.212851406	B2RWS6; F6RX08
GO:0006656	phosphatidylcholine biosynthetic process	biological_process	2	83	3	151	0.16335126	0.264755303	1.212851406	D3YYG4; A7YL62
GO:0008654	phospholipid biosynthetic process	biological_process	2	83	3	151	0.16335126	0.264755303	1.212851406	D3YYG4; A7YL62
GO:0042439	ethanolamine-containing compound metabolic process	biological_process	2	83	3	151	0.16335126	0.264755303	1.212851406	D3YYG4; A7YL62
GO:0045017	glycerolipid biosynthetic process	biological_process	2	83	3	151	0.16335126	0.264755303	1.212851406	D3YYG4; A7YL62
GO:0046165	alcohol biosynthetic process	biological_process	2	83	3	151	0.16335126	0.264755303	1.212851406	D3YYG4; A7YL62
GO:0046470	phosphatidylcholine metabolic process	biological_process	2	83	3	151	0.16335126	0.264755303	1.212851406	D3YYG4; A7YL62
GO:0046474	glycerophospholipid biosynthetic process	biological_process	2	83	3	151	0.16335126	0.264755303	1.212851406	D3YYG4; A7YL62
GO:0042734	presynaptic membrane	cellular_component	2	83	3	151	0.16335126	0.264755303	1.212851406	Q80VP1; Q8BSU1
GO:0098562	cytoplasmic side of membrane	cellular_component	2	83	3	151	0.16335126	0.264755303	1.212851406	Q80VP1; A0A0N4SUN4
GO:0019825	oxygen binding	molecular_function	2	83	3	151	0.16335126	0.264755303	1.212851406	A8DUK4; Q91VB8
GO:0032994	protein-lipid complex	cellular_component	2	83	3	151	0.16335126	0.264755303	1.212851406	Q3UWC2; A7YL62
GO:0034358	plasma lipoprotein particle	cellular_component	2	83	3	151	0.16335126	0.264755303	1.212851406	Q3UWC2; A7YL62
GO:1990777	lipoprotein particle	cellular_component	2	83	3	151	0.16335126	0.264755303	1.212851406	Q3UWC2; A7YL62
GO:0006091	generation of precursor metabolites and energy	biological_process	2	83	3	151	0.16335126	0.264755303	1.212851406	Q64446; D3YUE8
GO:0006873	cellular ion homeostasis	biological_process	2	83	3	151	0.16335126	0.264755303	1.212851406	Q64446; Q8BSU1
GO:0006875	cellular metal ion homeostasis	biological_process	2	83	3	151	0.16335126	0.264755303	1.212851406	Q64446; Q8BSU1
GO:0007626	locomotory behavior	biological_process	2	83	3	151	0.16335126	0.264755303	1.212851406	Q64446; Q8BSU1
GO:0017016	Ras GTPase binding	molecular_function	2	83	3	151	0.16335126	0.264755303	1.212851406	Q64446; A0A0N4SUN4
GO:0030003	cellular cation homeostasis	biological_process	2	83	3	151	0.16335126	0.264755303	1.212851406	Q64446; Q8BSU1
GO:0031267	small GTPase binding	molecular_function	2	83	3	151	0.16335126	0.264755303	1.212851406	Q64446; A0A0N4SUN4
GO:0051020	GTPase binding	molecular_function	2	83	3	151	0.16335126	0.264755303	1.212851406	Q64446; A0A0N4SUN4
GO:0071230	cellular response to amino acid stimulus	biological_process	2	83	3	151	0.16335126	0.264755303	1.212851406	Q64446; Q8K173
GO:1900542	regulation of purine nucleotide metabolic process	biological_process	2	83	3	151	0.16335126	0.264755303	1.212851406	Q64446; Q9D4N6
GO:0006732	coenzyme metabolic process	biological_process	2	83	3	151	0.16335126	0.264755303	1.212851406	D3YUE8; Q3UEK0
GO:0016051	carbohydrate biosynthetic process	biological_process	2	83	3	151	0.16335126	0.264755303	1.212851406	D3YUE8; Q3UYR9
GO:0016791	phosphatase activity	molecular_function	2	83	3	151	0.16335126	0.264755303	1.212851406	D3YUE8; Q9ESY2
GO:0042578	phosphoric ester hydrolase activity	molecular_function	2	83	3	151	0.16335126	0.264755303	1.212851406	D3YUE8; Q9ESY2
GO:0051186	cofactor metabolic process	biological_process	2	83	3	151	0.16335126	0.264755303	1.212851406	D3YUE8; Q3UEK0
GO:0007187	G-protein coupled receptor signaling pathway, coupled to cyclic nucleotide second messenger	biological_process	2	83	3	151	0.16335126	0.264755303	1.212851406	Q9D4N6; Q8BSU1
GO:0007188	adenylate cyclase-modulating G-protein coupled receptor signaling pathway	biological_process	2	83	3	151	0.16335126	0.264755303	1.212851406	Q9D4N6; Q8BSU1
GO:0019932	second-messenger-mediated signaling	biological_process	2	83	3	151	0.16335126	0.264755303	1.212851406	Q9D4N6; Q8BSU1
GO:0005774	vacuolar membrane	cellular_component	2	83	3	151	0.16335126	0.264755303	1.212851406	A0JLR7; A2ARV4
GO:0030016	myofibril	cellular_component	2	83	3	151	0.16335126	0.264755303	1.212851406	A0JLR7; O55124
GO:0043292	contractile fiber	cellular_component	2	83	3	151	0.16335126	0.264755303	1.212851406	A0JLR7; O55124
GO:0044437	vacuolar part	cellular_component	2	83	3	151	0.16335126	0.264755303	1.212851406	A0JLR7; A2ARV4
GO:0044449	contractile fiber part	cellular_component	2	83	3	151	0.16335126	0.264755303	1.212851406	A0JLR7; O55124
GO:0044420	extracellular matrix component	cellular_component	2	83	3	151	0.16335126	0.264755303	1.212851406	Q07563; Q8K173
GO:0031668	cellular response to extracellular stimulus	biological_process	2	83	3	151	0.16335126	0.264755303	1.212851406	Q3TIA9; P19157
GO:0045931	positive regulation of mitotic cell cycle	biological_process	2	83	3	151	0.16335126	0.264755303	1.212851406	Q3TIA9; F6RX08
GO:0071496	cellular response to external stimulus	biological_process	2	83	3	151	0.16335126	0.264755303	1.212851406	Q3TIA9; P19157
GO:0034111	negative regulation of homotypic cell-cell adhesion	biological_process	2	83	3	151	0.16335126	0.264755303	1.212851406	A0A0A6YWT3; P19157
[truncated: 1,356 more rows]
