# Supplementary material for: Sanye Tablet Ameliorates Insulin Resistance and Dysregulated Lipid Metabolism in High-Fat Diet-Induced Obese Mice
Source: Front Pharmacol. 2021 Sep 29;12:713750. doi: 10.3389/fphar.2021.713750 (PMC8511530; doi:10.3389/fphar.2021.713750)
Supplement: Supplementary file 5 [file DataSheet1.ZIP › raw data/raw data figure 7 proteomics-enrichment-kegg analysis.xls]

	term	ListHits	ListTotal	PopHits	PopTotal	pval	padj	Enrichment_score	Gene
mmu05150	Staphylococcus aureus infection	1	47	1	84	0	0	1.787234043	A2A513
mmu04024	cAMP signaling pathway	2	47	2	84	0	0	1.787234043	B2RWS6; Q9D4N6
mmu04066	HIF-1 signaling pathway	2	47	2	84	0	0	1.787234043	B2RWS6; Q9ESY2
mmu04110	Cell cycle	1	47	1	84	0	0	1.787234043	B2RWS6
mmu04330	Notch signaling pathway	1	47	1	84	0	0	1.787234043	B2RWS6
mmu04350	TGF-beta signaling pathway	1	47	1	84	0	0	1.787234043	B2RWS6
mmu04630	JAK-STAT signaling pathway	4	47	4	84	0	0	1.787234043	B2RWS6; Q8CCC2; F8WH42; Q80XZ4
mmu04720	Long-term potentiation	3	47	3	84	0	0	1.787234043	B2RWS6; Q9D4N6; Q8BSU1
mmu04919	Thyroid hormone signaling pathway	1	47	1	84	0	0	1.787234043	B2RWS6
mmu04922	Glucagon signaling pathway	1	47	1	84	0	0	1.787234043	B2RWS6
mmu05164	Influenza A	2	47	2	84	0	0	1.787234043	B2RWS6; Q8CCC2
mmu05169	Epstein-Barr virus infection	1	47	1	84	0	0	1.787234043	B2RWS6
mmu05211	Renal cell carcinoma	1	47	1	84	0	0	1.787234043	B2RWS6
mmu05215	Prostate cancer	2	47	2	84	0	0	1.787234043	B2RWS6; P19157
mmu04144	Endocytosis	2	47	2	84	0	0	1.787234043	Q80VP1; A0A0N4SUN4
mmu05143	African trypanosomiasis	2	47	2	84	0	0	1.787234043	A8DUK4; Q8CCC2
mmu05144	Malaria	1	47	1	84	0	0	1.787234043	A8DUK4
mmu00260	Glycine, serine and threonine metabolism	1	47	1	84	0	0	1.787234043	D3YUE8
mmu04020	Calcium signaling pathway	2	47	2	84	0	0	1.787234043	Q9D4N6; Q8BSU1
mmu04022	cGMP-PKG signaling pathway	1	47	1	84	0	0	1.787234043	Q9D4N6
mmu04211	Longevity regulating pathway	1	47	1	84	0	0	1.787234043	Q9D4N6
mmu04213	Longevity regulating pathway - multiple species	1	47	1	84	0	0	1.787234043	Q9D4N6
mmu04540	Gap junction	2	47	2	84	0	0	1.787234043	Q9D4N6; Q8BSU1
mmu04713	Circadian entrainment	1	47	1	84	0	0	1.787234043	Q9D4N6
mmu04723	Retrograde endocannabinoid signaling	2	47	2	84	0	0	1.787234043	Q9D4N6; Q8BSU1
mmu04725	Cholinergic synapse	1	47	1	84	0	0	1.787234043	Q9D4N6
mmu04727	GABAergic synapse	1	47	1	84	0	0	1.787234043	Q9D4N6
mmu04911	Insulin secretion	1	47	1	84	0	0	1.787234043	Q9D4N6
mmu04914	Progesterone-mediated oocyte maturation	1	47	1	84	0	0	1.787234043	Q9D4N6
mmu04923	Regulation of lipolysis in adipocytes	1	47	1	84	0	0	1.787234043	Q9D4N6
mmu04925	Aldosterone synthesis and secretion	1	47	1	84	0	0	1.787234043	Q9D4N6
mmu04970	Salivary secretion	1	47	1	84	0	0	1.787234043	Q9D4N6
mmu04971	Gastric acid secretion	1	47	1	84	0	0	1.787234043	Q9D4N6
mmu04972	Pancreatic secretion	2	47	2	84	0	0	1.787234043	Q9D4N6; Q7TPZ8
mmu04976	Bile secretion	1	47	1	84	0	0	1.787234043	Q9D4N6
mmu05032	Morphine addiction	1	47	1	84	0	0	1.787234043	Q9D4N6
mmu05142	Chagas disease	2	47	2	84	0	0	1.787234043	Q9D4N6; Q8CCC2
mmu05414	Dilated cardiomyopathy	1	47	1	84	0	0	1.787234043	Q9D4N6
mmu04974	Protein digestion and absorption	3	47	3	84	0	0	1.787234043	Q07563; Q8K173; Q7TPZ8
mmu00250	Alanine, aspartate and glutamate metabolism	1	47	1	84	0	0	1.787234043	Q3TIA9
mmu04360	Axon guidance	2	47	2	84	0	0	1.787234043	A2ABP5; Q6ZPG8
mmu00770	Pantothenate and CoA biosynthesis	1	47	1	84	0	0	1.787234043	Q3UEK0
mmu04064	NF-kappa B signaling pathway	1	47	1	84	0	0	1.787234043	Q9CZW2
mmu01212	Fatty acid metabolism	1	47	1	84	0	0	1.787234043	Q3TUU3
mmu04146	Peroxisome	3	47	3	84	0	0	1.787234043	Q3TUU3; Q8BQN4; Q9Z211
mmu05202	Transcriptional misregulation in cancer	1	47	1	84	0	0	1.787234043	Q3ULL0
mmu03013	RNA transport	1	47	1	84	0	0	1.787234043	F6RX08
mmu00534	Glycosaminoglycan biosynthesis - heparan sulfate / heparin	2	47	2	84	0	0	1.787234043	Q3UYR9; Q80UW0
mmu00130	Ubiquinone and other terpenoid-quinone biosynthesis	2	47	2	84	0	0	1.787234043	Q99KL8; Q3UEH2
mmu04620	Toll-like receptor signaling pathway	1	47	1	84	0	0	1.787234043	Q8CCC2
mmu04622	RIG-I-like receptor signaling pathway	1	47	1	84	0	0	1.787234043	Q8CCC2
mmu04940	Type I diabetes mellitus	1	47	1	84	0	0	1.787234043	Q8CCC2
mmu05140	Leishmaniasis	1	47	1	84	0	0	1.787234043	Q8CCC2
mmu05162	Measles	1	47	1	84	0	0	1.787234043	Q8CCC2
mmu05321	Inflammatory bowel disease	1	47	1	84	0	0	1.787234043	Q8CCC2
mmu05330	Allograft rejection	1	47	1	84	0	0	1.787234043	Q8CCC2
mmu00051	Fructose and mannose metabolism	1	47	1	84	0	0	1.787234043	Q9ESY2
mmu00510	N-Glycan biosynthesis	1	47	1	84	0	0	1.787234043	A2AJ14
mmu04141	Protein processing in endoplasmic reticulum	1	47	1	84	0	0	1.787234043	A2AJ14
mmu04080	Neuroactive ligand-receptor interaction	1	47	1	84	0	0	1.787234043	Q8BSU1
mmu00270	Cysteine and methionine metabolism	1	47	1	84	0	0	1.787234043	Q3UEH2
mmu00350	Tyrosine metabolism	1	47	1	84	0	0	1.787234043	Q3UEH2
mmu00360	Phenylalanine metabolism	1	47	1	84	0	0	1.787234043	Q3UEH2
mmu00400	Phenylalanine, tyrosine and tryptophan biosynthesis	1	47	1	84	0	0	1.787234043	Q3UEH2
mmu01230	Biosynthesis of amino acids	1	47	1	84	0	0	1.787234043	Q3UEH2
mmu04740	Olfactory transduction	1	47	1	84	0	0	1.787234043	F8VQI7
mmu04340	Hedgehog signaling pathway	1	47	1	84	0	0	1.787234043	A2ARV4
mmu05166	Human T-cell leukemia virus 1 infection	3	47	4	84	0.092440999	0.180920241	1.340425532	B2RWS6; Q9D4N6; P70354
mmu05206	MicroRNAs in cancer	3	47	4	84	0.092440999	0.180920241	1.340425532	B2RWS6; A2ACL2; A2AUN0
mmu04060	Cytokine-cytokine receptor interaction	3	47	4	84	0.092440999	0.180920241	1.340425532	Q8CCC2; F8WH42; Q80XZ4
mmu04210	Apoptosis	2	47	3	84	0.170175475	0.291425502	1.191489362	Q3U7T5; Q9CZW2
mmu04916	Melanogenesis	2	47	3	84	0.170175475	0.291425502	1.191489362	B2RWS6; Q9D4N6
mmu05152	Tuberculosis	2	47	3	84	0.170175475	0.291425502	1.191489362	B2RWS6; Q8CCC2
mmu05168	Herpes simplex virus 1 infection	2	47	3	84	0.170175475	0.291425502	1.191489362	B2RWS6; Q8CCC2
mmu04015	Rap1 signaling pathway	2	47	3	84	0.170175475	0.291425502	1.191489362	Q9D4N6; Q3V3I1
mmu04611	Platelet activation	2	47	3	84	0.170175475	0.291425502	1.191489362	Q9D4N6; Q8K173
mmu04724	Glutamatergic synapse	2	47	3	84	0.170175475	0.291425502	1.191489362	Q9D4N6; Q8BSU1
mmu04915	Estrogen signaling pathway	2	47	3	84	0.170175475	0.291425502	1.191489362	Q9D4N6; A2AUN0
mmu04918	Thyroid hormone synthesis	2	47	3	84	0.170175475	0.291425502	1.191489362	Q9D4N6; A2ARV4
mmu04610	Complement and coagulation cascades	2	47	3	84	0.170175475	0.291425502	1.191489362	Q00898; A0A0R4J293
mmu05016	Huntington disease	3	47	5	84	0.263456847	0.357003042	1.072340426	B2RWS6; Q8BSU1; E9Q7P0
mmu04072	Phospholipase D signaling pathway	3	47	5	84	0.263456847	0.357003042	1.072340426	Q9D4N6; A2AUN0; Q8BSU1
mmu05146	Amoebiasis	3	47	5	84	0.263456847	0.357003042	1.072340426	Q9D4N6; Q8K173; Q8CCC2
mmu04068	FoxO signaling pathway	1	47	2	84	0.310097533	0.357003042	0.893617021	B2RWS6
mmu04520	Adherens junction	1	47	2	84	0.310097533	0.357003042	0.893617021	B2RWS6
mmu05161	Hepatitis B	1	47	2	84	0.310097533	0.357003042	0.893617021	B2RWS6
mmu05203	Viral carcinogenesis	1	47	2	84	0.310097533	0.357003042	0.893617021	B2RWS6
mmu00564	Glycerophospholipid metabolism	1	47	2	84	0.310097533	0.357003042	0.893617021	D3YYG4
mmu00565	Ether lipid metabolism	1	47	2	84	0.310097533	0.357003042	0.893617021	D3YYG4
mmu04978	Mineral absorption	1	47	2	84	0.310097533	0.357003042	0.893617021	Q64446
mmu00010	Glycolysis / Gluconeogenesis	1	47	2	84	0.310097533	0.357003042	0.893617021	D3YUE8
mmu00230	Purine metabolism	1	47	2	84	0.310097533	0.357003042	0.893617021	Q9D4N6
mmu04114	Oocyte meiosis	1	47	2	84	0.310097533	0.357003042	0.893617021	Q9D4N6
mmu04261	Adrenergic signaling in cardiomyocytes	1	47	2	84	0.310097533	0.357003042	0.893617021	Q9D4N6
mmu04912	GnRH signaling pathway	1	47	2	84	0.310097533	0.357003042	0.893617021	Q9D4N6
mmu04913	Ovarian steroidogenesis	1	47	2	84	0.310097533	0.357003042	0.893617021	Q9D4N6
mmu04921	Oxytocin signaling pathway	1	47	2	84	0.310097533	0.357003042	0.893617021	Q9D4N6
mmu04933	AGE-RAGE signaling pathway in diabetic complications	1	47	2	84	0.310097533	0.357003042	0.893617021	Q8K173
mmu04115	p53 signaling pathway	1	47	2	84	0.310097533	0.357003042	0.893617021	Q9CZW2
mmu04012	ErbB signaling pathway	1	47	2	84	0.310097533	0.357003042	0.893617021	A2AUN0
mmu04722	Neurotrophin signaling pathway	1	47	2	84	0.310097533	0.357003042	0.893617021	A2AUN0
mmu04910	Insulin signaling pathway	1	47	2	84	0.310097533	0.357003042	0.893617021	A2AUN0
mmu04917	Prolactin signaling pathway	1	47	2	84	0.310097533	0.357003042	0.893617021	A2AUN0
mmu05034	Alcoholism	1	47	2	84	0.310097533	0.357003042	0.893617021	A2AUN0
mmu05214	Glioma	1	47	2	84	0.310097533	0.357003042	0.893617021	A2AUN0
mmu05220	Chronic myeloid leukemia	1	47	2	84	0.310097533	0.357003042	0.893617021	A2AUN0
mmu00280	Valine, leucine and isoleucine degradation	1	47	2	84	0.310097533	0.357003042	0.893617021	Q3TUU3
mmu00592	alpha-Linolenic acid metabolism	1	47	2	84	0.310097533	0.357003042	0.893617021	Q3TUU3
mmu01040	Biosynthesis of unsaturated fatty acids	1	47	2	84	0.310097533	0.357003042	0.893617021	Q3TUU3
mmu05216	Thyroid cancer	1	47	2	84	0.310097533	0.357003042	0.893617021	F6RX08
mmu05133	Pertussis	1	47	2	84	0.310097533	0.357003042	0.893617021	Q8CCC2
mmu05134	Legionellosis	1	47	2	84	0.310097533	0.357003042	0.893617021	Q8CCC2
mmu00310	Lysine degradation	1	47	2	84	0.310097533	0.357003042	0.893617021	G5E8N3
mmu04152	AMPK signaling pathway	1	47	2	84	0.310097533	0.357003042	0.893617021	Q9ESY2
mmu04550	Signaling pathways regulating pluripotency of stem cells	1	47	2	84	0.310097533	0.357003042	0.893617021	F8WH42
mmu04668	TNF signaling pathway	1	47	2	84	0.310097533	0.357003042	0.893617021	F8WH42
mmu00480	Glutathione metabolism	1	47	2	84	0.310097533	0.357003042	0.893617021	P19157
mmu00980	Metabolism of xenobiotics by cytochrome P450	1	47	2	84	0.310097533	0.357003042	0.893617021	P19157
mmu00982	Drug metabolism - cytochrome P450	1	47	2	84	0.310097533	0.357003042	0.893617021	P19157
mmu04062	Chemokine signaling pathway	2	47	4	84	0.403378905	0.46052425	0.893617021	Q9D4N6; A2AUN0
mmu04142	Lysosome	1	47	3	84	0.589941648	0.626527177	0.595744681	Q3U7T5
mmu04270	Vascular smooth muscle contraction	1	47	3	84	0.589941648	0.626527177	0.595744681	Q9D4N6
mmu04014	Ras signaling pathway	1	47	3	84	0.589941648	0.626527177	0.595744681	A2AUN0
mmu04510	Focal adhesion	1	47	3	84	0.589941648	0.626527177	0.595744681	A2AUN0
mmu04650	Natural killer cell mediated cytotoxicity	1	47	3	84	0.589941648	0.626527177	0.595744681	A2AUN0
mmu00071	Fatty acid degradation	1	47	3	84	0.589941648	0.626527177	0.595744681	Q3TUU3
mmu00983	Drug metabolism - other enzymes	1	47	3	84	0.589941648	0.626527177	0.595744681	Q91WG0
mmu05145	Toxoplasmosis	1	47	3	84	0.589941648	0.626527177	0.595744681	Q8CCC2
mmu04390	Hippo signaling pathway	1	47	3	84	0.589941648	0.626527177	0.595744681	P07724
mmu05200	Pathways in cancer	3	47	7	84	0.633130832	0.667222493	0.765957447	B2RWS6; Q9D4N6; F6RX08
mmu03320	PPAR signaling pathway	2	47	6	84	0.768238954	0.78800816	0.595744681	A7YL62; Q3TUU3
mmu04310	Wnt signaling pathway	1	47	4	84	0.776504392	0.78800816	0.446808511	B2RWS6
mmu04750	Inflammatory mediator regulation of TRP channels	1	47	4	84	0.776504392	0.78800816	0.446808511	Q9D4N6
mmu05100	Bacterial invasion of epithelial cells	1	47	4	84	0.776504392	0.78800816	0.446808511	A2AUN0
mmu05205	Proteoglycans in cancer	1	47	4	84	0.776504392	0.78800816	0.446808511	Q8CCC2
mmu05204	Chemical carcinogenesis	1	47	5	84	0.885332659	0.891842458	0.357446809	P19157
mmu01100	Metabolic pathways	7	47	20	84	0.971445344	0.971445344	0.625531915	D3YYG4; D3YUE8; Q3TIA9; Q3TUU3; Q3UYR9; A2AJ14; Q3UEH2
