# Supplementary material for: Sanye Tablet Ameliorates Insulin Resistance and Dysregulated Lipid Metabolism in High-Fat Diet-Induced Obese Mice
Source: Front Pharmacol. 2021 Sep 29;12:713750. doi: 10.3389/fphar.2021.713750 (PMC8511530; doi:10.3389/fphar.2021.713750)
Supplement: Supplementary file 5 [file DataSheet1.ZIP › raw data/raw data figure2-6.xlsx]

## Sheet: figure2.ABCDEFGHI
bodyweight（g）												Food intake(g/mouse/day)						Caloric intake(kcal)							Liver weight(g)							Subcutaneous fat weight(g)						Epididymis fat(g)							SFW/BW(%)
Con												Con	HFD	MET	SYTL	SYTH		Con	HFD	MET	SYTL	SYTH			Con	HFD	MET	SYTL	SYTH			Con	HFD	MET	SYTL	SYTH		Con	HFD	MET	SYTL	SYTH			Con	HFD	MET	SYTL	SYTH
0 week	18.4	18.7	19.2	15.4	19.6	20.5	18.8	19	16.7	18.8		4.33	2.75	3	3.25	2.08		12.99	14.41	15.72	17.03	10.8992			1.547	2.364	1.44	1.894	1.458			0.33	3.54	1.99	1.3	0.65		0.422	1.933	1.984	1.44	1.135			1.11	7.64	5.74	3.55	1.93
2 w	23.1	19.1	21.8	24.9	24.9	22.1	18.3	22	21.4	23		4.25	3.4	3.19	3.4	2.63		12.75	17.816	16.7156	17.816	13.7812			1.121	2.033	1.453	1.542	1.52			0.3	2.35	2.24	2.12	0.41		0.32	1.879	1.785	1.55	0.695			1.26	5.21	6.28	5.44	2.53
4 w	25.4	24.1	24.2	24.1	23.2	22.1	26.4	25.2	24.1	26.8		2.75	2.58	3.6	3.08	3.33		8.25	13.5192	18.864	16.1392	17.4492			1.479	2.19	1.459	1.494	1.373			0.35	1.99	1.6	2.25	0.86		0.572	2.223	1.478	1.807	1.749			1.24	4.85	4.55	3.32	2.2
6 w	27.3	25.8	25.1	25.8	25	24.6	27.2	27	25.8	27.7		3.58	2.75	3.63	3.13	3.5		10.74	14.41	19.0212	16.4012	18.34			1.412	2.109	1.327	1.404	1.182			0.18	2.34	1.72	1.26	1.46		0.251	1.71	1.442	1.894	1.955			0.856	4.71	4.2	5.3	4.03
8 w	27.9	26.5	26.1	26.5	21.9	28	28	28	26	28.7		4.67	3.7	2.75	3.92	3.13		14.01	19.388	14.41	20.5408	16.4012			1.781	1.993	1.53	1.499	1.406			0.43	1.66	1.07	2.01	1.38		0.472	1.619	1.544	1.805	2.025			1.25	4.28	3.498	6.55	4.42
10 w	27.8	28.8	24.4	28.8	21.8	27	29.4	30	28.5	26.1		3.92	2.75	3.5	3.9	3.38		11.76	14.41	18.34	20.436	17.7112			1.276	2.037	1.515	1.167	1.676			0.15	2.48	1.5	2.36	1.36		0.305	2.451	2.226	1.743	2.248			1.278	6.33	4.22	6.64	4.96
12 w	29.2	27	26.9	27	22.7	25	28.3	28.5	27.3	30		3.25	3.1	2.5	3.25	3.17		9.75	16.244	13.1	17.03	16.6108			1.68	2.105	1.251	1.702	1.683			0.19	1.64	2.3	2.16	1.74		0.294	2.083	1.868	1.865	1.79			0.869	4.81	5.4	3.53	4.94
14 w	29.9	28.1	27	28.1	23.6	26.3	29.4	30.1	28.6	30.5		4.42	2.5	3	3.38	2.88		13.26	13.1	15.72	17.7112	15.0912			1.522	2.104	1.183	1.242	1.368			0.29	2.77	2.41	1.46	2.05		0.383	2.323	2.524	1.657	1.833			0.829	6.75	5.76	3.7	3.78
16 w	29.4	30.1	27.9	30.1	24	26.5	27.6	30.1	28.8	31.5		3.88	3.38	3.08	3.05	3.17		11.64	17.7112	16.1392	15.982	16.6108			1.493	2.359	1.85	1.736	1.585			0.2	2.19	2.03	1.44	2.4		0.292	1.889	1.207	1.744	0.842			1.022	5.03	3.98	4.6	3.99
18 w	29.8	29.4	27.3	29.4	23.9	25.9	30.1	30.4	28.7	28.1		3.9	3.5	3.5	2.63	3.33		11.7	18.34	18.34	13.7812	17.4492			1.209	2.557	1.21	1.879	1.633			0.29	2.49	2.03	2	1.04		0.302	1.877	2.029	1.272	0.926			1.27	5.4	4.86	3.9	3.58
20 w	29.7	31.2	26.7	31.2	23.3	27.4	31.3	30.7	29.8	29.9
HFD
0 week	18.7	18.6	19.3	19.9	19.2	18.4	17	18.7	19.6	18.8
2 w	22	22.5	22.9	25.6	24.2	22.9	20.5	23.9	22	22.9
4 w	23.9	25.6	25.7	30.8	28.5	26	23.5	27.3	25.8	26.3
6 w	26.5	28.7	25.9	34.7	31.3	27.9	26.2	30.4	26.3	28.6
8 w	28.9	28.8	27	38.9	33.5	30.1	28.6	33.8	27.7	30.8
10 w	30	30.6	27.6	38.2	31.2	31.7	32	31.5	29.6	31.3
12 w	34.5	34.5	31.7	44.1	28.7	32.9	34.6	35.7	32.5	34.3
14 w	37.2	35.6	33.6	45.9	32.7	34.7	37.4	39.5	35.5	36.9
16 w	38	37.6	34.6	48.7	36.9	37.1	39.4	43.5	39.2	39.4
18 w	42.1	38.6	38.5	48.6	38.2	38.5	42.1	41.2	41.3	41
20 w	46.3	42	41.1	49.6	41	43.6	46.1	43.2	44	44.9
MET
0 week	19.2	19.7	18.1	18.7	18.7	18.3	18.5	19.5	18	19.8
2 w	21.6	22.5	19.7	22.5	20.9	25.3	23.2	20.3	23.2	21.3
4 w	24.1	24.7	24.4	24.8	24.8	27.1	25.2	24.4	25.5	23.1
6 w	25.1	28	25.6	26.1	24.6	29.2	27.1	26.7	28.2	24.8
8 w	27	28.7	28.2	29.5	28.6	28.6	28	30	31.7	26.8
10 w	25.8	29.2	27	30.6	30.1	30.3	28.5	30	32.6	27.8
12 w	29.3	30.5	31.1	29.5	30.1	32	30.4	32.6	35.1	28.5
14 w	29.3	29	32.3	33.1	32.4	31.9	30.6	33.3	35	28.1
16 w	30.9	31.4	34	34.7	35.2	32	31.2	34.2	37.7	29.4
18 w	32.1	35.6	38.1	38.7	39.1	36.1	31.6	38.5	38.8	33
20 w	34.6	37.6	40.9	42.5	41.8	41.7	34	38	42.6	34.6
SYTL
0 week	19.6	19.5	19	17.8	18.7	19.7	19.5	18.9	17.9	18.9
2 w	20.7	21.8	21	23.9	22.8	23.3	23.4	25.1	22	22.6
4 w	23.3	26.3	26	26.6	24.5	25	24.8	29.9	26.5	25.8
6 w	24.3	28.5	28.7	29.3	26.3	25.5	28.3	32.9	28.4	28
8 w	27.8	30.2	31	31.1	27	27.4	30.6	37.5	32	30.5
10 w	28.9	31	31.4	32.2	27.8	28.2	31.2	38.7	31.7	31.2
12 w	31.9	31.8	30.8	32.4	29.4	29.8	33.8	42.1	33.9	32.8
14 w	31.4	32.5	30.2	33.9	29.3	31.2	33.1	41	33.3	32.8
16 w	31.2	33.8	32.4	38.3	29.5	32.6	35.3	41.5	35.1	34.4
18 w	27.7	35.5	35	38.4	31	34.6	36	38.4	43.4	35.5
20 w	26.6	36.7	38.7	41.3	30.8	37.8	38.9	42.1	40.1	37
SYTH
0 week	18	19.6	18	19	19	20.2	19.1	18.5	20.1	19
2 w	21.7	23.2	20.7	20.1	22.1	24	21.6	23.3	23.2	22.2
4 w	23.7	26.4	24.7	22.6	24.1	25.6	23.6	25.9	25.1	24.6
6 w	25.2	26.6	29.6	25.8	24	26.5	27	30.9	27.5	27
8 w	27.8	32.1	28.5	28.8	25.4	28.1	25.3	27.9	28.4	28
10 w	27.4	33.2	29.5	29.6	25.5	29.2	26	27.4	29.8	28.6
12 w	29.9	36.7	32.9	31.5	26.3	30.9	27	29.9	31.1	30.6
14 w	28.9	36.3	33.1	31.5	27.8	30.6	27	29.6	32.1	30.7
16 w	30.7	38.4	34.6	32.1	29.4	31.2	28.4	32.2	33.7	32.3
18 w	31.9	39	34.6	33.6	32.8	35.1	31.2	34.5	38.7	34.6
20 w	31.3	39.2	33.7	36.1	34	38.1	35.3	35.5	40.7	35.9

## Sheet: figure3.ABCDEFGHI
																					GTT AUC						Insulin(ng/mL)						HOMA-IR index							Blood glucose (ITT,mM)
	FBG(mmol/L)								Blood glucose (OGTT,mM)												Con	HFD	MET	SYTL	SYTH		Con	HFD	MET	SYTL	SYTH		Con	HFD	MET	SYTL	SYTH			Con
	Con	HFD	MET	SYTL	SYTH				Con												23.4	51.38	24.1	34.43	31.53		0.3031	1.04228	1.10754	0.79004	0.72359		3.63134	16.7839	6.27784	5.96583	5.90304		0 min	7	10.1	9.3	9.4	8.4	7.8	5.5	8.2	10.8	9
	8.1	12.5	6.9	8	5.6			0 min	8.6	8.1	8.4	8.2	6.8	8.3	6.5	8	8.3	5.9			23.69	51.68	27.95	30.23	27.4		0.30645	1.50852	1.28187	1.46036	0.80303		3.19774	23.3201	7.92654	5.48285	9.21838		15 min	3.9	8.5	4.9	6.2	4.6	4.4	3.7	3.4	5.9	4.4
	8.8	12	8	10.7	5.9			15 min	16.3	19.1	14	15.1	14.2	18.1	18	17.3	18.3	18.9			21.89	49.84	33.11	32.16	18.7		0.61763	2.04111	1.98491	1.69339	0.83553		7.0018	29.1869	17.1322	6.99639	12.4346		30 min	3.5	8.2	4.3	4.2	3.8	4.1	2.6	3.4	3.8	4
	8.2	11.1	7.4	6.9	6.3			30 min	18	15.6	14.9	10	10.2	12	9.7	13.4	12.5	14.8			19.7	44.88	24.43	30.66	29.56		0.67201	2.3585	2.19407	1.74915	1.7032		7.09885	21.8759	18.0896	12.2872	11.9427		60 min	3.2	6.3	3.6	3.8	2.6	2.2	2.5	2.9	3.8	3.6
	6.8	8.3	6.4	9.6	10.2			60 min	11	11.5	10.8	9.9	6.7	11	8.6	10.7	10.1	8.6			17.88	39.73	34.45	36.78	37.94		0.77739	3.65833	2.54224	2.14428	2.2333		6.80999	32.5185	15.0651	16.9745	19.889		90 min	3.3	9.1	3.8	3.7	3.2	2.9	3.4	2.5	5	3.4
	8.7	12.5	6.7	8.5	10			90 min	8	7.2	9.2	8.6	8.5	7.9	8.2	7.8	8	8.4			21.64	28.29	25.64	33.8	27.83		0.82854	3.7156	2.57046	2.26148	3.1986		9.28605	39.7288	11.2587	25.9597	17.48		120 min	3.2	7.9	5	3.2	3.3	3.8	4.7	3.4	4.7	3.4
	6.5	10	8.2	7.9	8.7			120 min	8	10.8	7	7.6	8.2	8.5	8	7	6.7	7.3			19.35	42.84	35.71	36.66	31.16		0.88243	3.98123	2.63482	2.73449	4.17209		7.38911	64.11	17.6503	54.8217	19.7271
	8.9	10	7.9	10.4	9.9																21.35	33.85	34.48	34.71	31.11		1.23037	4.25305	2.89388	4.36141	4.24392		14.1067	54.7897	18.6401	41.5508	40.4537
	8.3	8.8	5.2	8.2	7.5																21.03	38.74	31.76	31.8	35.33		1.39594	5.17138	4.89807	4.41573	4.50719		14.926	66.62	40.3834	64.4506	60.8674
	5.9	8.8	7.4	10.6	7.5																21.34	46.49	43.08	37.14	29.98		1.49228	5.37786	1.231	1.12	0.534		11.3423	53.3456	10.6251	3.64599	15.0055
	5.3	7.9	7.4	8.7	7.6
																																								HFD
									HFD																														0 min	12.6	10.9	11.3	12	11.3	11.4	11.5	8.5	12.1	11.5
								0 min	10	9	11.1	7.2	6.9	8.3	11	10	10	7.7																					15 min	7.4	7.5	10.1	8	7.7	6.4	8.8	5.2	8.3	8.3
								15 min	30	29	30	20	22.9	18.3	28.9	29	27.4	23.8																					30 min	6.4	5.3	5.5	6.5	5.6	4.8	6	3.9	5.9	6.9
								30 min	33	33	40	35	24.1	21	33.3	30.2	28.9	32.2																					60 min	5.3	3.7	4.3	4.9	4.7	3.8	5.7	3.8	6.1	5.4
								60 min	27	26	25.1	27	23.1	13.2	25.6	13.7	18.7	28																					90 min	4.6	3.7	5.9	3.7	5	3.9	6.5	4.3	6.5	6.2
								90 min	24	25.6	20.3	18.5	19	11.8	12.9	10.1	14.9	19																					120 min	5.6	5.9	7.3	4.3	6	5	7.4	3.7	7.4	7.6
								120 min	19	20.5	13	12.4	12.2	9.2	10	8.5	12	16
																																								MET
									MET																														0 min	8.2	9.9	7.1	11.3	7.4	8.4	5.4	8.2	8	8.4
								0 min	4.4	4.8	6.7	6.4	4.6	5.5	5.2	5	6.4	6.7																					15 min	5	4.5	3.7	9.3	7	6.5	3.7	5.6	5.8	5.4
								15 min	21	21.4	24.3	21	24.3	19.3	24.9	23.8	27.5	21.3																					30 min	3.9	4	3.8	5.3	5.2	5.8	3.3	4.5	4.7	4.3
								30 min	20	22	26.4	19	26	19	26.3	25.4	25.1	20.9																					60 min	3.4	3.4	2.6	5.8	5.4	5.3	2.7	4.1	3.9	4.3
								60 min	10.8	12	17.6	11.2	20.3	13.9	22	18.7	13.7	25.1																					90 min	4.2	3.6	3.8	7.5	5.5	5.4	3.2	4.7	4.9	4.5
								90 min	7.5	12	10.7	7.9	11.4	8.5	11.7	13	11.1	23.1																					120 min	3.4	4	3.6	7.8	5.8	7.7	3.8	5.2	5.4	5
								120 min	6.6	7	8.6	6.8	8.8	7.2	8.5	10.1	9.1	19.9
																																								SYTL
									SYTL																														0 min	9	9.4	9.9	9.8	9.9	7.4	11.8	6.6	13	9.6
								0 min	5.8	6	5.7	5.7	7.2	6	5.6	7.2	10.7	10.4																					15 min	6.5	6	4.7	5.6	5.6	4.7	8.4	3.6	7.4	5.8
								15 min	25	22.9	24.4	24	28.4	22.8	27.1	25	24.4	23.5																					30 min	3.9	4.5	4.2	4.1	4.2	3.1	6.7	3.2	5.3	4.3
								30 min	24	21.6	26.2	22	29.2	25	29.3	24.3	21.1	24.3																					60 min	3.2	3.8	3.8	3.4	3.7	3.8	3.4	3.1	4.2	3.6
								60 min	18.9	17.5	16.7	15.8	18.2	17.9	18	18.5	16.8	18.6																					90 min	2.9	3.6	3.3	3.2	3.2	3.2	3.2	3.3	4.4	3.4
								90 min	13.1	9.2	10	10.4	12.5	11.7	14	12.8	10.9	15.6																					120 min	3.9	3.7	3.4	4.1	4.1	2.8	4.4	4.6	4.2	3.9
								120 min	9.8	9.2	8.7	10.4	9.9	12.7	8.8	11.2	10.4	15
																																								SYTH
									SYTH																														0 min	10.1	9	8.3	8.9	9.3	10.1	9.5	9.5	7	10
								0 min	6.4	5.3	6.5	5.6	5.9	6.3	10.2	7.6	11.1	7.2																					15 min	6.5	4.5	5.5	6.7	5.9	4.9	4	5.1	4.2	7.6
								15 min	21.5	22.9	16.5	15.6	24.9	18.1	19	20	23.8	20.2																					30 min	3.2	4	4.5	4.1	4.3	4.3	4.5	3.9	3.3	6.7
								30 min	24	19.9	12.1	18.9	28.4	18.5	21.3	22.1	22.1	20.8																					60 min	2.9	3.5	3.2	3.5	4.1	4	3.7	3.5	3	3.5
								60 min	16.8	11.8	7.6	18.5	20.8	14.3	14.7	16.8	16.9	15.3																					90 min	3.2	3.1	3	3.1	3.3	3.7	3.2	2.9	3.2	3.2
								90 min	11	11.2	7.3	13.1	14.2	11.6	13.4	11.7	15.9	12.1																					120 min	4.2	4.1	3.5	4.1	3.5	3.4	4.1	3.7	4.1	4.2
								120 min	9.8	8.2	7.1	8.3	11.3	10.5	12.4	10.5	13.2	10.1

## Sheet: figure4.BCD
	ALT(U/L)							LPS(ng/L)							IL-1α(pg/mL)
	Con	HFD	MET	SYTL	SYTH			Con	HFD	MET	SYTL	SYTH			Con	HFD	SYTL	SYTH
	29	29	19	35	24			264.99	265.8	414.16	457.64	312.22			122.95	190.6	273.43	97.8
	20	91	52	25	28			220	363.46	243.48	249.64	213.84			98.94	184.25	250.57	85.29
	46	185	26	29	38			191.7	208.57	218.57	250.26	440.28			98.37	172.01	202.21	76.32
	36	105	26	50	27			117.7	791.86	619.93	251.96	224.02			94.91	170.76	174.08	57.75
	30	20	20	20	34			179.11	666.17	222.95	208.66	218.75			93.15	156.64	146.81	56.18
	17	37	23	30	34			167.15	315.61	188.67	209.56	268.56			81.52	128.9	106.2	52.96
	67	54	70	20	40			277.4	215.54	335.69	250.17	222.41			34.6	107.29	69.53	49.62
	28	35	14	50	40			211.61	286.42	553.16	353.82	198.93			25.43	101.77	46.14	13.57
	37	34	24	17	37			556.81	577.44	348.33	515.13	293.29			9.54	94.91	25.43	3.95
	16	89	42	18	24			214.47	224.02	350.12	269.1	266.65			73.25	79.59	15.34	13.57

## Sheet: figure5.ABDE
																									Cer(peak area）						ceramide												SM
	Con												Con												Con	HFD	MET	SYT			Con												Con
	LPA	429.643	82477.2	96566.5	130057	103641	80140.2	74309.2	81942.3	96219.1	103066		CE	7.16599e+06	1.90477e+07	1.52204e+07	2.14458e+07	1.37583e+07	1.54987e+07	1.22745e+07	1.14103e+07	1.06343e+07	1.67425e+07		272569	414358	760204	321652			total CER	272569	274764	245807	292578	270476	272876	200447	248269	271657	555606		SM(16:0)	247858809	231112516	229457343	257409393	203336675	230365287
	PA	23331.3	3.39988e+07	2.81756e+07	4.01513e+07	3.2259e+07	2.50988e+07	3.06745e+07	1.77452e+07	3.3158e+07	2.79881e+07		DCER	109220	183745	136575	213560	144404	102920	88345.4	123701	142411	534226		274764	336605	280087	305641			CER14:0	5289.92	1110.7	4424.41	6009.01	3611.47	6565.21	2862.3	7644.26	2159.5	5760		SM(18:0)	17010573	20598307	15997086	17011876	14905799	17703341
	LPC	5771.34	1.00934e+07	9.45152e+06	1.33426e+07	1.74198e+07	8.63842e+06	1.49416e+07	1.24545e+07	1.0215e+07	1.33984e+07		HCER	301519	282988	271386	287055	190018	317955	163727	306519	416545	924330		245807	470216	348399	315658			CER16:0	144556	36191.6	33960.9	40348	23896.9	139306	19771	169113	86479.7	422560		SM(18:1)	5161517	5684286	5450748	5670509	4703361	5294537
	PC	23299.8	4.71628e+06	3.97604e+06	9.04076e+06	4.57343e+06	3.40123e+06	3.62331e+06	2.80872e+06	3.67543e+06	4.63989e+06		HexCer	118020	112899	102640	124265	104641	137142	109612	100424	112296	194307		292578	269030	464503	233577			CER18:0	9722	4350.4	9509.39	11094.6	2934.91	2787.45	5181.59	7419.55	15005.4	54656.7		SM(22:1)	567815244	499355512	506801540	596002766	534400284	576422522
	LPE	17583.8	1.18008e+08	1.27011e+08	1.73113e+08	1.23847e+08	1.07095e+08	1.05925e+08	8.4731e+07	1.47828e+08	1.07335e+08		LacCer	68976.8	65633.9	52578.6	63993.9	72609.2	50787	32704.6	59348.2	53319.7	132386		270476	437984	336300	439934			CER20:0	26217.3	24000.6	24859.1	30590.9	21750.9	24772.5	15841.7	17993.5	21113.6	46002.3
	PE	59430.4	1.80465e+08	138647168	2.19469e+08	1.67056e+08	1.42008e+08	1.8548e+08	1.05669e+08	1.69511e+08	1.44295e+08		LCER	79371.6	77379	85244.2	122365	74167.7	76315.4	72125.3	76901.9	68718.1	93772.3		272876	494349	560707	344260			CER22:0	79180.9	107005	87842.9	167532	79034.6	67115.5	55609.4	86215.7	136765	243906
	PG	25256.4	5.17635e+07	3.96652e+07	6.17333e+07	5.3057e+07	4.21749e+07	5.87617e+07	2.91898e+07	4.61497e+07	4.4434e+07		GluCer	313107	356218	346411	366829	414243	304599	217797	323658	376143	696867		200447	443254					CER24:0	53227.2	97588.2	86872	100528	71790.4	42256.6	39723.7	46010.7	97224.7	234822		HFD
	LPI	3960.05	3.97521e+06	4.35503e+06	6.25455e+06	4.36417e+06	2.47969e+06	2.93465e+06	2.91442e+06	4.75341e+06	6.62214e+06		DAG	2.41608e+06	1.63925e+06	833846	1.50145e+06	1.04805e+06	1.73574e+06	638021	1.58753e+06	1.31589e+06	1.9857e+06		248269	378830					CER24:1	53076.8	119621	132462	139580	98397.2	64510.2	68016.1	86003.1	97695.4	205822		SM(16:0)	404271772	259552175	406441378	292389521	461051816	444070039
	PI	19663.7	1.47265e+07	1.14408e+07	2.1421e+07	1.45643e+07	1.05956e+07	1.32757e+07	9.2786e+06	1.31925e+07	1.36331e+07		S-1-P	87.2222	284.528	287.986	518.689	279.774	68.8675	86.0392	681.04	268.019	684.985		271657	408604																	SM(18:0)	59196376	29167807	53458608	31854789	52100258	54294861
	FFA	7.5294e+06	3354606546	2579469628	2792201327	2532587316	3003980116	2427292594	3134128696	4021663551	3811890450		SM	2775561990	2278225641	2104518278	2581916836	2213351255	2350777392	2007135208	2334857311	2327677964	2682026685		555606																		SM(18:1)	15984462	9219679	14293756	9281327	17826966	17044939
													TAG	5.65157e+08	4.53056e+08	4.91662e+08	3.10024e+08	3.84946e+08	3.38028e+08	1.84012e+08	5.56933e+08	4.66221e+08	3.56374e+08								HFD												SM(22:1)	571285381	559077381	624705732	586576874	681900545	676459884
																															total CER	414358	336605	470216	269030	437984	494349	443254	378830	408604
	HFD												HFD																		CER14:0	7158.65	4405.93	7334.99	7334.95	2556.68	6684.72	8105.18	4273.48	5630
	LPA	98671.6	96744.6	77073.3	136485	65611.2	140560	123478	78984	95979.8			CE	6.63568e+07	1.72619e+07	4.08976e+07	2.77633e+07	6.46146e+07	4.1566e+07	2.53009e+07	2.62565e+07	3.76251e+07									CER16:0	78808	230951	344721	293209	398083	418301	477340	358143	223572			MET
	PA	3.2026e+07	3.66142e+07	2.80307e+07	4.25758e+07	2.72537e+07	3.85189e+07	4.23742e+07	3.21093e+07	3.54e+07			DCER	281022	225163	369808	322801	355557	493958	407367	288267	399532									CER18:0	32818.3	15852	49294.2	14700.1	37011.2	27507	36888.7	28892.4	12144.6			SM(16:0)	494554522	267652027	434489013	453245384	335169431	456624961
	LPC	5.59562e+06	1.38026e+07	8.0502e+06	1.17838e+07	6.22971e+06	1.36215e+07	1.18568e+07	7.68937e+06	1.44173e+07			HCER	449357	529752	1.05179e+06	579463	929251	853961	1.20249e+06	716237	752143									CER20:0	116000	34883.4	150294	61330.4	163407	200822	85535.8	67532.8	87946.2			SM(18:0)	100319202	24433661	80032187	51307003	39551820	62452938
	PC	5.6329e+06	4.99689e+06	2.7655e+06	4.88049e+06	3.60701e+06	7.08396e+06	8.49432e+06	4.16439e+06	3.11876e+06			HexCer	96524.2	73808.9	95573	56076.6	88484.1	84287.5	79658.7	62125.1	97259.4									CER22:0	189577	152011	321849	195634	281225	278618	486360	280874	432741			SM(18:1)	25344779	8908234	25176187	17482881	12819303	16895197
	LPE	1.48366e+08	1.25809e+08	9.65042e+07	1.71372e+08	111728145	1.70836e+08	2.17358e+08	1.04881e+08	1.2123e+08			LacCer	165969	147792	188750	89295.7	156358	210170	165908	167097	143916									CER24:0	64475.8	54477	151124	82606.2	118031	105210	119848	78928.8	114758			SM(22:1)	665711949	499000087	472165441	491407146	398313476	569747677
	PE	2.10062e+08	2.27649e+08	1.66294e+08	2.762e+08	1.71878e+08	2.15815e+08	2.77189e+08	1.99826e+08	1.83441e+08			LCER	126025	85298.6	127043	85913	147987	175937	159590	124883	134193									CER24:1	120556	172839	244238	140082	178827	185825	317949	128377	158577
	PG	6.73194e+07	6.37662e+07	5.57015e+07	8.84177e+07	5.24059e+07	8.05471e+07	8.76762e+07	5.80272e+07	6.41397e+07			GluCer	563488	314906	397874	289166	516193	510323	351629	388444	421905
	LPI	3.42793e+06	2.78243e+06	1.75902e+06	4.38739e+06	2.9332e+06	9.12102e+06	5.7564e+06	2.96167e+06	4.43669e+06			DAG	719936	1.43447e+06	906834	914379	934761	872175	709728	811755	530366																					SYT
	PI	1.55347e+07	1.66471e+07	8.90164e+06	1.83805e+07	1.00164e+07	2.37105e+07	2.59973e+07	1.32542e+07	1.74282e+07			S-1-P	161.99	552.51	45.1639	664.186	2230.13	52.5112	325.894	634.02	282.732									MET												SM(16:0)	246307314	314432098	293748746	239938344	379746794	303791660
	FFA	3127076185	2037606865	2369863732	2394059821	2108688995	3184527554	3055404884	2451112569	2538712887			SM	2884031535	2376726319	2845186499	2481627978	3047349274	3014123681	2711748728	2704423758	2578530708									total CER	760204	280087	348399	464503	336300	560707						SM(18:0)	33902474	44742435	41935789	35462358	42401191	38056425
													TAG	8.5292e+07	4.09547e+08	183087265	3.9704e+08	1.282e+08	1.16063e+08	6.72166e+07	1.5451e+08	7.02892e+07									CER14:0	14242.3	3416.55	5040.6	6273.45	3975.23	6830						SM(18:1)	10358416	13262629	12555681	12856589	13601999	10315851
	MET																														CER16:0	235448	335875	199951	74744.6	666378	439973						SM(22:1)	497091556	504027222	482823917	302567312	588325666	557215323
	LPA	105868	91884.4	59007.5	56722.8	56122.6	88397.6						MET																		CER18:0	96768.5	38527.4	52114.1	27635.2	35031.4	50410.2
	PA	3.77743e+07	3.52913e+07	3.2369e+07	2.05769e+07	3.18413e+07	3.12864e+07						CE	2.40979e+07	8.33026e+06	3.29824e+07	4.08307e+07	1.42339e+07	6.62477e+07												CER20:0	212323	81850.8	73001.6	87165.4	95378.3	200850
	LPC	1.12941e+07	1.05954e+07	1.22685e+07	6.44388e+06	7.77132e+06	1.2139e+07						DCER	128709	297025	128437	235859	330060	435256												CER22:0	433634	127789	152365	193238	289639	302985
	PC	5.56875e+06	5.01406e+06		1.74967e+06	7.17543e+06	4.34126e+06						HCER	1.39441e+06	638771	642196	642607	1.19661e+06	1.14605e+06												CER24:0	86505.6	102726	42740.6	116468	141577	175700
	LPE	1.75416e+08	9.81892e+07	1.66881e+08	7.22679e+07	7.02803e+07	1.24895e+08						HexCer	187070	67513.1	91863	85126.9	68172.2	72264.9												CER24:1	287572	178950	138976	296925	166911	217724
	PE	2.25882e+08	1.94263e+08	5.13656e+08	1.13217e+08	2.24415e+08	1.79874e+08						LacCer	401873	91582	127755	194601	93246.4	222410
	PG	7.71519e+07	6.47619e+07	1.1124e+08	3.61078e+07	6.07544e+07	5.68329e+07						LCER	94870.1	68645.8	115993	152486	70869.7	190746
	LPI	3.94733e+06	3.40392e+06	2.51643e+06	2.4353e+06	1.48427e+06	3.63064e+06						GluCer	255010	261020	384264	692039	292274	828527												SYT
	PI	1.77856e+07	1.55465e+07	2.81815e+07	9.23507e+06	1.46979e+07	1.57242e+07						DAG		745098	1.11964e+06	516037	662893	675701												total CER	321652	305641	315658	233577	439934	344260
	FFA	2752376427	2678484381	3840436029	1697114390	2811064705	2516451538						S-1-P	53.31	295.441	277.334	390.251	212.856	139.807												CER14:0	4469.76	1423.91	4577.64	4341.95	4721.69	1620
													SM	3440360542	2282184621	2800598252	2694932235	2148924203	2830900706												CER16:0	140160	207039	228393	228443	260600	118390
													TAG	9.24994e+08	1.41888e+08	1.29859e+08	4.65038e+07	1.32062e+08	7.47064e+07												CER18:0	12709.3	30193.5	12781.6	17259.9	28583.1	17246
	SYT																														CER20:0	47103.1	57513.6	90444.8	18944.2	79907	78533.2
	LPA	76663.1	99594.2	50781	77819.9	2790.78	74615.4						SYT																		CER22:0	152145	207616	132693	80212.6	236061	223503
	PA	2.84733e+07	3.6653e+07	2.62355e+07	2.81335e+07	14721.6	2.94611e+07						CE	1.13562e+07	1.96117e+07	1.54235e+07	5.02537e+06	1.25837e+07	1.63984e+07												CER24:0	72398.7	54438.8	64834.1	45694.4	87001.3	71933.4
	LPC	8.58553e+06	1.33213e+07	4.89981e+06	1.10763e+07	7947.09	1.07316e+07						DCER	242616	168834	232783	179844	247334	213245												CER24:1	91815	155272	117356	84217.4	123595	148360
	PC	3.09689e+06	5.68825e+06	2.08901e+06	3.02434e+06	12170.9	3.56171e+06						HCER	385915	708410	577185	454464	671214	558304
	LPE	9.1009e+07	1.67147e+08	6.77501e+07	8.52896e+07	14402.4	1.01818e+08						HexCer	44685.5	12190.4	61511.5	50456	75161.6	38664
	PE	164051457	2.38965e+08	1.65188e+08	1.46799e+08	92499.7	1.77723e+08						LacCer	159536	157557	133275	83116.8	211763	173480
	PG	4.96268e+07	7.06553e+07	4.5273e+07	4.91842e+07	43151.8	5.13345e+07						LCER	78590.9	106655	99968.4	49099	146516	106984
	LPI	2.60375e+06	3.85344e+06	1.51008e+06	3.19158e+06	3538.65	2.95698e+06						GluCer	409526	377313	315308	301376	449781	412337
	PI	1.12361e+07	1.57843e+07	6.47212e+06	1.05854e+07	2350.25	1.26126e+07						DAG	531700	507744	411116	374595	509153	518607
	FFA	2152587173	2786356319	1809505433	2203054967	1.7029e+08	2431347130						S-1-P	166.892	99.2383	598.245	144.308	150.273	217.603
													SM	2224558026	2322633732	2216145390	1733031016	2690449529	2438563061
													TAG	2.09601e+08	1.93701e+08	9.23093e+07	5.48334e+07	118006889	1.59796e+08
[truncated: 4 more columns]

## Sheet: figure6.ABDE
	SREBP-1/β-Actin						ACC/β-Actin
	Con	HFD	MET	SYTL	SYTH		Con	HFD	MET	SYTL	SYTH
	48.93	150	47.88	114.42	45.21		7.3	847.23	370.12	349.25	136.66
	163.11	278.75	21.2	82.71	15.8		45.36	351.68	186.74	343.96	37.36
	47.99	107.07	73.85	58.6	66.16		55.02	965.95	360.26	978.94	265.25
	139.97	150.1	27.43	55.01	43.85		292.31	409.93	358.49	370.54	255.07
